# Supplementary material for: Comprehension of Procedural Visual Business Process Models
Source: Springer Nature journal article supplement (doi:10.1007/s12599-016-0460-2), 2017-01-02
Supplement: MOESM1 [file 11969316]

# **Comprehension of Procedural Visual Business Process Models – A Literature Review**

**Kathrin Figl**

Bus Inf Syst Eng 59(1) (2017)

**Appendix (available online via <http://link.springer.com>)**

## Appendix A

**Table 1** Statistical methods used in empirical studies

| Type of Data          | Type of Question | Number of Samples | Parametric (P)/<br>Non-Parametric<br>(NP) Test | Statistical Test                                                                    | Count | Percentages |
|-----------------------|------------------|-------------------|------------------------------------------------|-------------------------------------------------------------------------------------|-------|-------------|
|                       | Description      |                   |                                                | Descriptive statistics only, no inferential statistics                              | 11    | 8%          |
| Discrete, categorical |                  |                   |                                                | Chi-Square test                                                                     | 1     | 1%          |
| Continuous            | Relationships    |                   |                                                | Regression analysis                                                                 | 22    | 15%         |
|                       |                  |                   | P                                              | Correlation analysis (Pearson's r)                                                  | 11    | 8%          |
|                       |                  |                   | NP                                             | Correlation analysis (Spearman's rank correlation)                                  | 14    | 10%         |
|                       | Differences      | 2 samples         | P                                              | Unpaired/paired Student's t-test                                                    | 5     | 3%          |
|                       |                  |                   | NP                                             | Wilcoxon rank-sum test, Mann-Whitney U-test                                         | 10    | 7%          |
|                       |                  | > 2 samples       | P                                              | ANOVA                                                                               | 49    | 34%         |
|                       |                  |                   | NP                                             | Kruskal-Wallis test/Sheirer-Ray-Hare test (for more than one independent variables) | 8     | 6%          |
|                       |                  |                   | P                                              | MANCOVA (Multivariate)                                                              | 8     | 6%          |
|                       |                  |                   |                                                | SEM (Structural equation modeling)                                                  | 4     | 3%          |
|                       |                  |                   |                                                | Information missing                                                                 | 4     |             |
|                       |                  |                   |                                                | Total                                                                               | 141   | 100%        |

**Table 2** Categorization of sample sizes for all empirical studies

| Quartile | n       | Label      |
|----------|---------|------------|
| 1        | 0-42    | Small      |
| 2        | 43-70   | Medium     |
| 3        | 71-113  | Large      |
| 4        | 114-273 | Very large |

**Table 3** Categorization of empirical studies' level of evidence of effects

| Level of Evidence       | Statistical Results                                                                                                                                                                                                                                                                                                                                                                                                                     |
|-------------------------|-----------------------------------------------------------------------------------------------------------------------------------------------------------------------------------------------------------------------------------------------------------------------------------------------------------------------------------------------------------------------------------------------------------------------------------------|
| -                       | <ul style="list-style-type: none"> <li>Effect was not investigated or not reported. (E.g., in a variety of cases, subjective comprehension was measured as a control variable, but not all effects of independent variables on subjective comprehension were reported.)</li> </ul>                                                                                                                                                      |
| No evidence (of effect) | <ul style="list-style-type: none"> <li>Effect was reported to be statistically not significant.</li> </ul>                                                                                                                                                                                                                                                                                                                              |
| Conflicting             | <ul style="list-style-type: none"> <li>Effect was reported to be both negative and positive in a study. (E.g., a factor led to lower comprehension in one model but higher comprehension in another.)</li> </ul>                                                                                                                                                                                                                        |
| Weak                    | <ul style="list-style-type: none"> <li>Effect was reported based on descriptive statistics only, with no inferential statistics.</li> <li>Effect was reported as a trend (<math>0.05 \leq p &lt; 0.01</math>).</li> <li>Effect was not calculated directly for measurement of comprehension accuracy but only for derived measures (e.g., efficiency, score time ratio).</li> </ul>                                                     |
| Moderate                | <ul style="list-style-type: none"> <li>Effect was significant in some but not all cases. For example: <ul style="list-style-type: none"> <li>“reached significance on a 0.05 level in at least two of five sub-samples”</li> <li>significance for model 1 but not for model 2</li> <li>significance for experts but not for novices</li> </ul> </li> <li>Statistical significant test results were reported, but no numbers.</li> </ul> |
| Strong                  | <ul style="list-style-type: none"> <li>Significance was reported in all cases (e.g., models). Numbers were reported.</li> </ul>                                                                                                                                                                                                                                                                                                         |

## Appendix B: Empirical Articles on Comprehension – Article-Based Overview

Table 4 Studies' characteristics and variables measured

| Source Reference       | # of Participants | Type of Participants                                                                                 | # of Models | Notation of Models | Measurement of Objective Comprehension                                                                                                                                                                              | Measurement of Time    | Measurement of Subjective Comprehension and User Preferences                                                 | Independent Variables [Category: Medium/Notation/Secondary Notation/Label/Model/Task/User; Research Design: Between/Within/Mixed]                                                                                                                                                                                                                                                                                                                                                                                                                                                                                                                                                                                                                                                                                                                   |
|------------------------|-------------------|------------------------------------------------------------------------------------------------------|-------------|--------------------|---------------------------------------------------------------------------------------------------------------------------------------------------------------------------------------------------------------------|------------------------|--------------------------------------------------------------------------------------------------------------|-----------------------------------------------------------------------------------------------------------------------------------------------------------------------------------------------------------------------------------------------------------------------------------------------------------------------------------------------------------------------------------------------------------------------------------------------------------------------------------------------------------------------------------------------------------------------------------------------------------------------------------------------------------------------------------------------------------------------------------------------------------------------------------------------------------------------------------------------------|
| (Aguilar et al. 2008)  | 110 (large)       | students (5 samples, mostly master's and PhD students in information systems or software technology) | 10          | BPMN               | six comprehension tasks – efficiency (ratio between the number of right answers and time) used as dependent variable                                                                                                | time taken             | -                                                                                                            | sixty defined measures – forty-six base measures that count significant elements of the model and fourteen derived measures (proportions between elements); nonsignificant measures are not mentioned in the results sections—only those that yielded significance in at least two of five sub-samples are mentioned as relevant influence factors: <ul style="list-style-type: none"> <li>• number of end message events [Model, Within]</li> <li>• number of events of the model [Model, Within]</li> <li>• number of exclusive decision data-based [Model, Within]</li> <li>• number of intermediate events of the model [Model, Within]</li> <li>• number of intermediate message events [Model, Within]</li> <li>• number of sequence flows from events [Model, Within]</li> <li>• number of looping sequence flows [Model, Within]</li> </ul> |
| (Bera 2012)            | 51 (medium)       | students (undergraduate MIS, novice modelers)                                                        | 2           | BPMN               | <ul style="list-style-type: none"> <li>• nine comprehension tasks (yes/no)</li> <li>• three open-ended problem-solving tasks (transfer tasks) - coded by two coders</li> </ul>                                      | time taken             | -                                                                                                            | <ul style="list-style-type: none"> <li>• with/without swim lanes [Secondary Notation, Between]</li> <li>• domain knowledge [User, Within]</li> <li>• modeling knowledge [User, Within]</li> </ul>                                                                                                                                                                                                                                                                                                                                                                                                                                                                                                                                                                                                                                                   |
| (Döhring et al. 2014)  | 14 (small)        | users familiar with process modeling: BPM researchers and practitioners                              | 2           | C-YAWL and vBPMN   | comprehension tasks (yes/no) on order, concurrency, exclusiveness (8 for a simple travel-booking model, 12 for a complex municipality-name registration model); results analyzed in combination with modeling tasks | time taken             | items on self-confidence and ease of answering (on a 5-point scale) for each task                            | <ul style="list-style-type: none"> <li>• C-YAWL and vBPMN (process variant management notations with differing configuration and adaptation mechanisms; C-YAWL without, v-BPMN with modularization support, in an execution tool; also included modeling tasks) [Notation, Within]</li> <li>• simple and complex model [Model, Within]</li> <li>• professional level: senior: post-docs and industry employees, student-level: students up to PhD [User, Between]</li> </ul>                                                                                                                                                                                                                                                                                                                                                                        |
| (Dumas et al. 2012)    | 55 (medium)       | students attending business process modeling courses                                                 | 8           | BPMN               | six comprehension tasks per model                                                                                                                                                                                   | -                      | rating of model complexity on a 5-point scale                                                                | <ul style="list-style-type: none"> <li>• structuredness (4 groups: structuredness (structured and unstructured) × cyclicity (cyclic, acyclic)) [Model, Mixed]</li> <li>• theoretical knowledge on process modeling [User, Between]</li> </ul>                                                                                                                                                                                                                                                                                                                                                                                                                                                                                                                                                                                                       |
| (Figl and Laue 2011)   | 199 (very large)  | students (business)                                                                                  | 4           | BPMN-like          | eight comprehension tasks per model (on concurrency, exclusiveness, order, repetition)                                                                                                                              | time taken (per model) | subjective cognitive load (7-point scale per comprehension task)                                             | <ul style="list-style-type: none"> <li>• item wording: concurrency, exclusiveness, order, repetition [Task→Model, Within]</li> <li>• element interactivity (PST-distance, cut vertex) per task [Task→Model, Within]</li> </ul>                                                                                                                                                                                                                                                                                                                                                                                                                                                                                                                                                                                                                      |
| (Figl and Laue 2015)   | 156 (very large)  | students (business)                                                                                  | 4           | BPMN               | eight comprehension tasks per model (on concurrency, exclusiveness, order, repetition)                                                                                                                              | time taken (per model) | subjective cognitive load (7-point scale per comprehension task)                                             | <ul style="list-style-type: none"> <li>• modeling knowledge (low, high) [User, Between]</li> <li>• control-flow pattern (sequence, AND, XOR, loop, compound) [Task→Model, Within]</li> <li>• element interactivity: process structure tree distance [Task→Model, Within]</li> <li>• element interactivity: cut-vertex [Task→Model, Within]</li> <li>• validity of conclusion (valid, wrong) [Task, Within]</li> </ul>                                                                                                                                                                                                                                                                                                                                                                                                                               |
| (Figl and Recker 2016) | 120 (very large)  | students (business, undergraduate)                                                                   | 1           | BPMN               | - [empirical article on subjective comprehension and user preferences]                                                                                                                                              | -                      | preference for process model representation for comprehension tasks [scores from 0 to 100 in sliding scales] | <ul style="list-style-type: none"> <li>• process model representation (text, structured text, diagram (BPMN)) [Notation, Within]</li> <li>• use of icons (with/without icons) [Notation, Within]</li> <li>• participants' cognitive style (verbal, spatial visual, object visual) [User, Between]</li> <li>• knowledge on conceptual modeling [User, Between]</li> </ul>                                                                                                                                                                                                                                                                                                                                                                                                                                                                            |

| Source Reference          | # of Participants                           | Type of Participants                                                             | # of Models                            | Notation of Models                                                       | Measurement of Objective Comprehension                                                                    | Measurement of Time    | Measurement of Subjective Comprehension and User Preferences                                                                                                                              | Independent Variables [Category: Medium/Notation/Secondary Notation/Label/Model/Task/User; Research Design: Between/Within/Mixed]                                                                                                                                                                                                                                                         |
|---------------------------|---------------------------------------------|----------------------------------------------------------------------------------|----------------------------------------|--------------------------------------------------------------------------|-----------------------------------------------------------------------------------------------------------|------------------------|-------------------------------------------------------------------------------------------------------------------------------------------------------------------------------------------|-------------------------------------------------------------------------------------------------------------------------------------------------------------------------------------------------------------------------------------------------------------------------------------------------------------------------------------------------------------------------------------------|
| (Figl et al. 2013a)       | 136 (very large)                            | students (business)                                                              | 3                                      | BPMN, UML AD, EPC, YAWL                                                  | comprehension tasks (yes/no) on order, concurrency, repetition, exclusiveness; model text comparison task | time taken (per model) | subjective cognitive load (7-point scale per comprehension task)                                                                                                                          | <ul style="list-style-type: none"> <li>modeling competencies: training on modeling basics, work experience, process modeling knowledge test [User, Between]</li> <li>perceptual discriminability deficiencies [Notation, Between]</li> <li>semiotic clarity deficiencies [Notation, Between]</li> </ul>                                                                                   |
| (Figl et al. 2013b)       | 154 (very large)                            | students (information systems and business)                                      | 4                                      | BPMN-like with differing routing symbols (BPMN, UML AD, and EPC)         | eight comprehension tasks per model (on concurrency, exclusiveness, order, repetition)                    | time taken (per model) | subjective cognitive load (7-point scale per comprehension task), scale on perceived control flow comprehension (self-developed, 4 items on a 5-point Likert scale)                       | <ul style="list-style-type: none"> <li>symbol quality (aesthetics) [Notation, Between]</li> <li>symbol quality (perceptual pop-out) [Notation, Between]</li> <li>symbol quality (semantic transparency) [Notation, Between]</li> <li>symbol quality (visual discriminability) [Notation, Between]</li> <li>process modeling knowledge [User, Between]</li> </ul>                          |
| (Figl and Strembeck 2015) | 44 (medium)                                 | students                                                                         | 2                                      | BPMN                                                                     | sixteen (2*8) true/false comprehension tasks                                                              | time taken             | perceived ease of use                                                                                                                                                                     | <ul style="list-style-type: none"> <li>flow direction (left-to-right, right-to-left, top-to-bottom, bottom-to-top) [Secondary Notation, Between]</li> <li>abstract and concrete labels [Label, Between]</li> <li>process modeling knowledge [User, Between]</li> </ul>                                                                                                                    |
| (Heggset et al. 2015)     | 18 (small)                                  | students and employees                                                           | 2                                      | BPMN                                                                     | fifteen and ten questions                                                                                 | -                      | -                                                                                                                                                                                         | <ul style="list-style-type: none"> <li>models before and after revising syntactic quality according to a guideline [Model, Mixed]</li> </ul>                                                                                                                                                                                                                                              |
| (Hipp et al. 2014)        | 22 (small)                                  | students, academics, industry participants                                       | 1                                      | new visualizations                                                       | - [empirical article on subjective comprehension and user preferences]                                    | -                      | <ul style="list-style-type: none"> <li>perceived comprehensibility</li> <li>perceived comprehensibility of sequence flow</li> <li>perceived clarity and overview</li> </ul> 5-point scale | <ul style="list-style-type: none"> <li>new visualizations (bubble visualization concept, BPMN3D, network visualization concepts, thin line concept) [Notation, Within]</li> </ul>                                                                                                                                                                                                         |
| (Jeyaraj and Sauter 2014) | 142 in study 1, 131 in study 2 (very large) | students (business)                                                              | 1                                      | similar to UML AD                                                        | identification of activities and internal/external actors                                                 | time taken             | -                                                                                                                                                                                         | <ul style="list-style-type: none"> <li>swim lanes versus no swim lanes [Secondary Notation, Between]</li> </ul>                                                                                                                                                                                                                                                                           |
| (Johannsen et al. 2014a)  | 53 (medium)                                 | students attending a process modeling course (bachelor level)                    | 1 with 3 levels and 8-10 sub-processes | eEPC                                                                     | open questions, fill-in-the-blank test                                                                    | -                      | perceived ease of understanding with four items on a 7-point scale                                                                                                                        | <ul style="list-style-type: none"> <li>domain knowledge [User, Between]</li> <li>decomposition: full compliance versus moderate violation (minimality, determinism, losslessness violated) versus strong violation (minimality, determinism, losslessness, minimum coupling, strong cohesion violated) [Secondary Notation, Between]</li> <li>personal factors [User, Between]</li> </ul> |
| (Jošt et al. 2016)        | 103 (large)                                 | students (undergraduate, no prior training in modeling)                          | 4                                      | BPMN, UML AD, EPC                                                        | questions on the semantics of the process; no other details found                                         | time taken             | -                                                                                                                                                                                         | <ul style="list-style-type: none"> <li>BPMN, UML AD, EPC [Notation, Mixed]</li> <li>complexity [Model, Mixed]</li> </ul>                                                                                                                                                                                                                                                                  |
| (Kock et al. 2008)        | 210 (very large)                            | students                                                                         | 1 (self-modeled)                       | flow diagram                                                             | - [empirical article on subjective comprehension and user preferences]                                    | -                      | perceived ease of understanding (2 Likert-type scale items, 7-point scale)                                                                                                                | <ul style="list-style-type: none"> <li>activity flow representation versus communication flow representation [Notation, Within]</li> </ul>                                                                                                                                                                                                                                                |
| (Kock et al. 2009)        | 78 (large)                                  | employees of 18 organizations (participants in business process redesign groups) | 1 (self-modeled)                       | communication flow diagrams versus functional flowcharts with swim lanes | - [empirical article on subjective comprehension and user preferences]                                    | -                      | perceived ease of understanding (3 items, 7-point scale)                                                                                                                                  | <ul style="list-style-type: none"> <li>modeling notation (high versus low communication flow orientation) [Notation, Within]</li> <li>ease of generating the models [Task, Within]</li> </ul>                                                                                                                                                                                             |
| (Koschmider et al. 2015b) | 49 (medium)                                 | process modeling beginners (graduates) and experts                               | 2                                      | no particular process modeling notation                                  | - [empirical article on subjective comprehension and user preferences]                                    | -                      | perceived ease of understanding on a 5-point scale                                                                                                                                        | <ul style="list-style-type: none"> <li>naming conventions for labels (unrevised versus revised activity labels from a linguistic perspective) [Label, Mixed]</li> </ul>                                                                                                                                                                                                                   |
| (Kummer et al. 2016)      | 127 (very large)                            | students (postgraduate, business)                                                | 2                                      | BPMN                                                                     | eight comprehension tasks per model                                                                       | time taken             | six-item Likert scale adopted from the ease of understanding measure                                                                                                                      | <ul style="list-style-type: none"> <li>culture (Germanic – Germany and Austria, Confucian – China) [User, Between]</li> <li>theoretical knowledge on process modeling [User, Between]</li> </ul>                                                                                                                                                                                          |

| Source Reference              | # of Participants | Type of Participants                                                                                                                                                                  | # of Models | Notation of Models                                                   | Measurement of Objective Comprehension                                                                                                                                         | Measurement of Time       | Measurement of Subjective Comprehension and User Preferences | Independent Variables [Category: Medium/Notation/Secondary Notation/Label/Model/Task/User; Research Design: Between/Within/Mixed]                                                                                                                                                                                                                                                                                                                                                                                                                                                                                                                                                                                                                                                                                                                                                                          |
|-------------------------------|-------------------|---------------------------------------------------------------------------------------------------------------------------------------------------------------------------------------|-------------|----------------------------------------------------------------------|--------------------------------------------------------------------------------------------------------------------------------------------------------------------------------|---------------------------|--------------------------------------------------------------|------------------------------------------------------------------------------------------------------------------------------------------------------------------------------------------------------------------------------------------------------------------------------------------------------------------------------------------------------------------------------------------------------------------------------------------------------------------------------------------------------------------------------------------------------------------------------------------------------------------------------------------------------------------------------------------------------------------------------------------------------------------------------------------------------------------------------------------------------------------------------------------------------------|
|                               |                   |                                                                                                                                                                                       |             |                                                                      |                                                                                                                                                                                |                           | (Burton-Jones and Meso 2008)                                 | <ul style="list-style-type: none"> <li>familiarity with BPMN [User, Between]</li> <li>color (black/white versus bright colors with high contrast based on Asian preferences) [Secondary Notation, Between]</li> </ul>                                                                                                                                                                                                                                                                                                                                                                                                                                                                                                                                                                                                                                                                                      |
| (Laue and Gadatsch 2011)      | 22 (small)        | students (business)                                                                                                                                                                   | 1           | EPC-like, without intermediary events                                | sixteen comprehension tasks on concurrency, nineteen on exclusiveness, thirty on order, six on forward dependency/response, and six on backward dependency/precedence          | -                         | -                                                            | <ul style="list-style-type: none"> <li>question type (concurrency, exclusiveness and order) [Task→Model, Within]</li> <li>question wording (style 1 and style 2 questions) [Task, Between]</li> </ul>                                                                                                                                                                                                                                                                                                                                                                                                                                                                                                                                                                                                                                                                                                      |
| (Melcher and Seese 2008)      | 18 (small)        | students attending a workflow management course                                                                                                                                       | 1           | BPMN-like (routing symbols labelled with XOR and AND)                | comprehension tasks on order, repetition, concurrency, and exclusiveness                                                                                                       | -                         | -                                                            | <ul style="list-style-type: none"> <li>comprehension tasks (group A: questions about order and repetition; group B: questions about concurrency and exclusiveness) [Task→Model, Between]</li> </ul>                                                                                                                                                                                                                                                                                                                                                                                                                                                                                                                                                                                                                                                                                                        |
| (Melcher et al. 2010)         | 178 (very large)  | students attending workflow management courses                                                                                                                                        | 1           | BPMN-like (routing symbols labelled with XOR and AND)                | 276 comprehension tasks on order, repetition, concurrency, exclusiveness distributed over nine groups                                                                          | -                         | -                                                            | <ul style="list-style-type: none"> <li>control flow element (order, repetition, concurrency, exclusiveness) [Task→Model, Between]</li> </ul>                                                                                                                                                                                                                                                                                                                                                                                                                                                                                                                                                                                                                                                                                                                                                               |
| (Mendling and Strembeck 2008) | 42 (small)        | German mailing lists EMISA and WI, as well as students attending courses on process modeling at the Vienna University of Economics and Business Administration                        | 6           | EPC-like, without events                                             | six yes/no comprehension tasks per model                                                                                                                                       | time taken                | -                                                            | <ul style="list-style-type: none"> <li>abstract activity labels (e.g., A, B, C) versus illustrative, textual labels (e.g., "check credit limit") [Label, Between]</li> <li>diameter (length of the longest path from a start node to an end node in the process model) [Model, Within]</li> <li>heterogeneity of gateways [Model, Within]</li> <li>number of nodes [Model, Within]</li> <li>separability [Model, Within]</li> <li>soundness [Model, Within]</li> <li>string length of all textual activity labels [Label, Within]</li> <li>structuredness of the process graph [Model, Within]</li> <li>token split [Model, Within]</li> <li>theoretical knowledge on process modeling [User, Between]</li> <li>intensity of work with process models (how often they work with process models) [User, Between]</li> <li>duration of involvement with business process modeling [User, Between]</li> </ul> |
| (Mendling et al. 2010c)       | 29 (small)        | students (after attending a course on process modeling)                                                                                                                               | 1           | EPC                                                                  | - [empirical article on subjective comprehension and user preferences]                                                                                                         | -                         | perceived usefulness for each label on a 7-point scale       | <ul style="list-style-type: none"> <li>labels of various styles (verb-object style, action-noun style, other styles) [Label, Within]</li> <li>perceived ambiguity of labels [Label, Within]</li> </ul>                                                                                                                                                                                                                                                                                                                                                                                                                                                                                                                                                                                                                                                                                                     |
| (Mendling et al. 2012b)       | 113 (very large)  | academics and practitioners with interest in modeling (EMISA and WI mailing list), graduate students (modeling courses, system analysis and design course)                            | 6           | EPC-like, without events (routing symbols labelled with XOR and AND) | six comprehension tasks per model                                                                                                                                              | time taken (per question) | -                                                            | <ul style="list-style-type: none"> <li>label semantics (abstract versus concrete labels) [Label, Between]</li> <li>modeling expertise [User, Between]</li> <li>modeling intensity [User, Between]</li> <li>formal theoretical process knowledge [User, Between]</li> <li>paper versus computer [Medium, Between]</li> </ul>                                                                                                                                                                                                                                                                                                                                                                                                                                                                                                                                                                                |
| (Natschläger 2011)            | 22 (small)        | post-graduate computer scientists                                                                                                                                                     | 2*4         | BPMN, deontic BPMN                                                   | thirty-four (2*17) comprehension tasks on exclusiveness and order of tasks                                                                                                     | -                         | -                                                            | <ul style="list-style-type: none"> <li>modeling notation (BPMN, deontic BPMN) [Notation, Between]</li> </ul>                                                                                                                                                                                                                                                                                                                                                                                                                                                                                                                                                                                                                                                                                                                                                                                               |
| (Ottensouser et al. 2012)     | 196 (very large)  | <ul style="list-style-type: none"> <li>users trained in process models (students who had received explicit training in business process modeling and flow-chart notations)</li> </ul> | 6           | BPMN notation versus written use cases                               | six multiple-choice comprehension tasks answered three times (increase in domain understanding measured); for example "What happens if stakeholders change the project scope?" | -                         | -                                                            | <ul style="list-style-type: none"> <li>BPMN notation (graphical) vs. written use cases (textual) [Notation, Within]</li> <li>comfort with flow charts [User, Between]</li> <li>frequency of use of flow charts [User, Between]</li> </ul>                                                                                                                                                                                                                                                                                                                                                                                                                                                                                                                                                                                                                                                                  |

| Source Reference           | # of Participants | Type of Participants                                                                                                                                                                                                                                                                                                                                                      | # of Models | Notation of Models | Measurement of Objective Comprehension                                                                                                                                                                                                                                                                                                                                                                                                                                                       | Measurement of Time | Measurement of Subjective Comprehension and User Preferences | Independent Variables [Category: Medium/Notation/Secondary Notation/Label/Model/Task/User; Research Design: Between/Within/Mixed]                                                                                                                                                                                                                                                  |
|----------------------------|-------------------|---------------------------------------------------------------------------------------------------------------------------------------------------------------------------------------------------------------------------------------------------------------------------------------------------------------------------------------------------------------------------|-------------|--------------------|----------------------------------------------------------------------------------------------------------------------------------------------------------------------------------------------------------------------------------------------------------------------------------------------------------------------------------------------------------------------------------------------------------------------------------------------------------------------------------------------|---------------------|--------------------------------------------------------------|------------------------------------------------------------------------------------------------------------------------------------------------------------------------------------------------------------------------------------------------------------------------------------------------------------------------------------------------------------------------------------|
|                            |                   | as business analyst proxies: <ul style="list-style-type: none"> <li>○ 129 (post-graduate industrial engineering)</li> <li>○ 26 (post-graduate BPM and enterprise systems)</li> </ul> <ul style="list-style-type: none"> <li>• users not trained in process models (without training in flow-charts, 41 students as business-user proxies from varying courses)</li> </ul> |             |                    |                                                                                                                                                                                                                                                                                                                                                                                                                                                                                              |                     |                                                              |                                                                                                                                                                                                                                                                                                                                                                                    |
| (Petrusel et al. 2016)     | 75 (large)        | experienced modelers from industry and academia                                                                                                                                                                                                                                                                                                                           | 16          | BPMN               | sixteen comprehension tasks (yes, no), eye-tracking                                                                                                                                                                                                                                                                                                                                                                                                                                          | time taken          | confidence rating (5-point scale)                            | <ul style="list-style-type: none"> <li>• color highlighting of gateways for task-relevant region [Secondary Notation, Within]</li> <li>• task-specific layout [Secondary Notation, Within]</li> </ul>                                                                                                                                                                              |
| (Pichler et al. 2012)      | 27 (small)        | students (Berlin, Innsbruck)                                                                                                                                                                                                                                                                                                                                              | 4           | BPMN versus ConDec | thirty-two (4*2*4) tasks: <ul style="list-style-type: none"> <li>• four sequential tasks (how input conditions lead to a certain outcome; e.g., "Activity X must be directly preceded by activity Y")</li> <li>• four circumstantial tasks (e.g., what (combination of) circumstances will cause/lead to/follow from a particular outcome? "If activity X or Y has been executed, is it possible to terminate a process instance by executing at least one additional activity?")</li> </ul> | time taken          | -                                                            | <ul style="list-style-type: none"> <li>• sequential and circumstantial tasks [Task, Within]</li> <li>• modeling paradigms: declarative versus imperative models [Notation, Between]</li> </ul>                                                                                                                                                                                     |
| (Recker and Dreiling 2007) | 69 (medium)       | students (postgraduate, information systems)                                                                                                                                                                                                                                                                                                                              | 2           | EPC versus BPMN    | multiple-choice comprehension tasks (yes, no, undecided), problem-solving task, cloze test filling in missing words in a textual process description                                                                                                                                                                                                                                                                                                                                         | time taken          | perceived ease of use scale (Moore, Benbasat 1991)           | <ul style="list-style-type: none"> <li>• business domain knowledge [User, Between]</li> <li>• modeling competencies: level of EPC competency [User, Between]</li> <li>• modeling notation (EPC versus BPMN; participants were familiar with EPC but not with BPMN) [Notation, Between]</li> </ul>                                                                                  |
| (Recker and Dreiling 2011) | 68 (medium)       | students (postgraduate, information systems)                                                                                                                                                                                                                                                                                                                              | 2           | EPC versus BPMN    | <ul style="list-style-type: none"> <li>• multiple-choice comprehension tasks (yes, no, unknown)</li> <li>• inferential problem-solving task (surface understanding; retention ability)</li> <li>• cloze test filling in missing words in a textual process description (deep understanding; transferability test) [without process models]</li> </ul>                                                                                                                                        | time taken          | perceived ease of use scale (Moore, Benbasat 1991)           | <ul style="list-style-type: none"> <li>• modeling notation (EPC versus BPMN; participants were familiar with EPC but not with BPMN) [Notation, Between]</li> <li>• English as a second language (ESL) [User, Between]</li> <li>• modeling experience with EPC (number of models created or read) [User, Between]</li> <li>• working experience with BPM [User, Between]</li> </ul> |

| Source Reference               | # of Participants                        | Type of Participants                                                                                                                                                                                                                          | # of Models                                                          | Notation of Models                    | Measurement of Objective Comprehension                                                                                                                                                                                                                                                   | Measurement of Time | Measurement of Subjective Comprehension and User Preferences          | Independent Variables [Category: Medium/Notation/Secondary Notation/Label/Model/Task/User; Research Design: Between/Within/Mixed]                                                                                                                                                                                                                                                                                                                                                                                                                                                                                                                                                                         |
|--------------------------------|------------------------------------------|-----------------------------------------------------------------------------------------------------------------------------------------------------------------------------------------------------------------------------------------------|----------------------------------------------------------------------|---------------------------------------|------------------------------------------------------------------------------------------------------------------------------------------------------------------------------------------------------------------------------------------------------------------------------------------|---------------------|-----------------------------------------------------------------------|-----------------------------------------------------------------------------------------------------------------------------------------------------------------------------------------------------------------------------------------------------------------------------------------------------------------------------------------------------------------------------------------------------------------------------------------------------------------------------------------------------------------------------------------------------------------------------------------------------------------------------------------------------------------------------------------------------------|
| (Recker et al. 2005)           | 16 (small)                               | students (postgraduate, information technology)                                                                                                                                                                                               | 2                                                                    | C-EPCs versus EPC                     | -<br>[empirical article on subjective comprehension and user preferences]                                                                                                                                                                                                                | -                   | perceived usefulness and perceived ease for various tasks             | <ul style="list-style-type: none"> <li>configurable EPCs (C-EPCs) versus EPC [Notation, Within]</li> </ul>                                                                                                                                                                                                                                                                                                                                                                                                                                                                                                                                                                                                |
| (Recker 2013)                  | 98 (large)                               | students (information systems)                                                                                                                                                                                                                | 3                                                                    | BPMN with/without gateway constructs  | four comprehension tasks per model measure participants' understanding of four fundamental aspects of the control flow logic of the models presented, viz., reachability, deadlocks, liveness, and option to complete                                                                    | -                   | perceived ease of understanding with four items (Maes and Poels 2007) | <ul style="list-style-type: none"> <li>number of arcs and nodes [Model, Within]</li> <li>implicit/explicit representation of parallel split and simple merge scenarios (with/without BPMN gateway constructs, perceptual discriminability effect through use of gateways) [Notation, Between]</li> <li>knowledge of control flow logic [User, Between]</li> <li>self-reported knowledge of BPMN grammar [User, Between]</li> </ul>                                                                                                                                                                                                                                                                        |
| (Recker et al. 2014)           | 92 (large)                               | three groups: domain experts (35 staff members from a government agency), method experts (22 postgraduate students enrolled in a business process management course), control group (35 mixed, without high domain or method knowledge score) | 2                                                                    | unknown                               | <ul style="list-style-type: none"> <li>multiple-choice tasks (domain surface understanding)</li> <li>comprehension test about the domain modeled</li> <li>ability to understand the models (modularity, concurrency, exclusiveness, and repetition of the control flow logic)</li> </ul> | -                   | -                                                                     | <ul style="list-style-type: none"> <li>selection ability [User, Between]</li> <li>abstraction ability [User, Between]</li> <li>users' surface learning motive and strategy [User, Between]</li> <li>users' deep learning motive and strategy [User, Between]</li> <li>prior domain knowledge [User, Between]</li> <li>method knowledge [User, Between]</li> <li>self-efficacy [User, Between]</li> <li>sensing versus intuitive learning style [User, Between]</li> <li>paper versus computer [Medium, Between]</li> </ul>                                                                                                                                                                                |
| (Reijers and Mendling 2011)    | 73 (large)                               | students from three universities, trained in Petrinets, EPCs, or both                                                                                                                                                                         | 12 (6 versions of the questionnaire, 847 complete model evaluations) | EPC-like                              | seven multiple-choice comprehension tasks related to execution order, exclusiveness, concurrency and repeatability issues (yes/no/I don't know) and one open question to describe problems with this process (0-2 points)                                                                | -                   | perceived ease of understanding the model (one question)              | <ul style="list-style-type: none"> <li>approximately twenty-four model-based metrics; only those correlations are reported that "displayed the direction of the influence that we hypothesized upon" [Model, Within]: <ul style="list-style-type: none"> <li>average gateway degree</li> <li>gateway heterogeneity</li> <li>cross-connectivity</li> <li>density</li> <li>gateway mismatch</li> <li>number of OR joins</li> </ul> </li> <li>educational background (undergraduate versus graduate students with higher level of knowledge of workflow concepts) [User, Between]</li> <li>modeling experience [User, Between]</li> <li>theoretical knowledge of process modeling [User, Between]</li> </ul> |
| (Reijers et al. 2011a)         | 70 (103 data sets, 33 excluded) (medium) | 62 experienced modelers (from industry and academia) and 41 students (from a business process management course)                                                                                                                              | 1                                                                    | workflow net                          | closed comprehension tasks on concurrency, exclusiveness, order, repetition; adapted from (Mendling et al. 2007); response options: yes, no, I don't know                                                                                                                                | time taken          | -                                                                     | <ul style="list-style-type: none"> <li>syntax highlighting (evaluated overall and separately for novices and experts) [Secondary Notation, Between]</li> </ul>                                                                                                                                                                                                                                                                                                                                                                                                                                                                                                                                            |
| (Reijers et al. 2011b)         | 28 (small)                               | experienced consultants                                                                                                                                                                                                                       | 2                                                                    | workflow net modeled with Protos tool | twelve comprehension tasks per model                                                                                                                                                                                                                                                     | time taken          | -                                                                     | <ul style="list-style-type: none"> <li>modularization (model with subprocesses, flattened model without subprocesses) [Secondary Notation, Mixed]</li> </ul>                                                                                                                                                                                                                                                                                                                                                                                                                                                                                                                                              |
| (Rodrigues et al. 2015)        | 73 (large)                               | students and practitioners from various IT companies (experienced and inexperienced subjects)                                                                                                                                                 | 1                                                                    | BPMN, textual process description     | ten multiple-choice questions                                                                                                                                                                                                                                                            | -                   | -                                                                     | <ul style="list-style-type: none"> <li>BPMN, textual process description modeling notation [Notation, Between]</li> </ul>                                                                                                                                                                                                                                                                                                                                                                                                                                                                                                                                                                                 |
| (Sánchez-González et al. 2010) | 22+40+9=71 (large)                       | students (in three computer engineering/information systems courses, analyzed separately, 9-40 students each)                                                                                                                                 | 15                                                                   | BPMN                                  | unclear                                                                                                                                                                                                                                                                                  | time taken          | -                                                                     | <ul style="list-style-type: none"> <li>coefficient of connectivity [Model, Within]</li> <li>depth [Model, Within]</li> <li>diameter [Model, Within]</li> <li>gateway heterogeneity [Model, Within]</li> <li>gateway mismatch [Model, Within]</li> <li>number of nodes [Model, Within]</li> </ul>                                                                                                                                                                                                                                                                                                                                                                                                          |

| Source Reference               | # of Participants | Type of Participants                                                                                                           | # of Models | Notation of Models                                                          | Measurement of Objective Comprehension                                                                                                                                                                                                                                                                                             | Measurement of Time | Measurement of Subjective Comprehension and User Preferences                                                                      | Independent Variables [Category: Medium/Notation/Secondary Notation/Label/Model/Task/User; Research Design: Between/Within/Mixed]                                                                                                                                                                                                                                                                                                                                                                                                                                                               |
|--------------------------------|-------------------|--------------------------------------------------------------------------------------------------------------------------------|-------------|-----------------------------------------------------------------------------|------------------------------------------------------------------------------------------------------------------------------------------------------------------------------------------------------------------------------------------------------------------------------------------------------------------------------------|---------------------|-----------------------------------------------------------------------------------------------------------------------------------|-------------------------------------------------------------------------------------------------------------------------------------------------------------------------------------------------------------------------------------------------------------------------------------------------------------------------------------------------------------------------------------------------------------------------------------------------------------------------------------------------------------------------------------------------------------------------------------------------|
|                                |                   |                                                                                                                                |             |                                                                             |                                                                                                                                                                                                                                                                                                                                    |                     |                                                                                                                                   | <ul style="list-style-type: none"> <li>• sequentiality [Model, Within]</li> </ul>                                                                                                                                                                                                                                                                                                                                                                                                                                                                                                               |
| (Sánchez-González et al. 2012) | 28 + 23 (medium)  | students (three courses, pre- and postgraduates)                                                                               | 15          | BPMN                                                                        | “a set of comprehension tasks”                                                                                                                                                                                                                                                                                                     | -                   | personal opinion on difficulty of completing comprehension tasks (1=very easy, 5=very difficult)                                  | no factorial design, but ten models cover a wide range of these measures; six independent variables [Model, Within]: <ul style="list-style-type: none"> <li>• average gateway degree: average number of both incoming and outgoing arcs of the gateway nodes</li> <li>• control-flow complexity (CFC): complexity of split gateways</li> <li>• gateway heterogeneity</li> <li>• gateway mismatch: sum of gateway pairs that do not match each other</li> <li>• maximum gateway degree: maximum number of incoming and outgoing arcs of a decision node</li> <li>• number of gateways</li> </ul> |
| (Sandkuhl and Wiebring 2015)   | 113 (large)       | employees of a company who may work with process models                                                                        | 1           | flow diagrams, eEPC, UML AD, BPMN                                           | seventeen true/false questions (identifying and counting elements in the process)                                                                                                                                                                                                                                                  | -                   | five Likert-scale items for perception of notation (e.g., illustration of roles and relationship to process tasks)                | <ul style="list-style-type: none"> <li>• flow diagrams, eEPC, UML AD, BPMN [Notation, Between]</li> </ul>                                                                                                                                                                                                                                                                                                                                                                                                                                                                                       |
| (Sarshar and Loos 2005)        | 50 (medium)       | students with business and economy backgrounds                                                                                 | 1           | EPC versus Petrinet                                                         | multiple-choice tasks                                                                                                                                                                                                                                                                                                              | -                   | perceived ease of use of model and of control flow                                                                                | <ul style="list-style-type: none"> <li>• questions for AND, XOR, OR, and multilevel AND/XOR situations [Task→Model, Within]</li> <li>• EPC versus Petrinet notation [Notation, Between]</li> </ul>                                                                                                                                                                                                                                                                                                                                                                                              |
| (Soffer et al. 2015)           | 54 (medium)       | students (in information systems attending a course on enterprise resource planning (ERP) systems and business process design) | 5           | EPC-like, with routing symbols left blank and a textual process description | assigning rules: <ul style="list-style-type: none"> <li>• identifying the specific case from the catalog for each gateway</li> <li>• providing a logical expression that specifies the behavior of the process; five true/false questions related to the possible process behavior</li> </ul>                                      | -                   | -                                                                                                                                 | <ul style="list-style-type: none"> <li>• provision of a catalog of routing possibilities or a catalog of workflow patterns [Task, Between]</li> </ul>                                                                                                                                                                                                                                                                                                                                                                                                                                           |
| (Stitzlein et al. 2013)        | 16 (small)        | professionals (healthcare or engineering)                                                                                      | 2           | BPMN, health process notation (HPN)                                         | twenty-eight (2*14) items (multiple-choice and open questions with short answers)                                                                                                                                                                                                                                                  | time taken          | perceived ease of use, perceived usefulness                                                                                       | <ul style="list-style-type: none"> <li>• BPMN, health process notation (HPN) [Notation, Mixed]</li> <li>• professional background - healthcare or engineering [User, Between]</li> </ul>                                                                                                                                                                                                                                                                                                                                                                                                        |
| (Turetken et al. 2016)         | 60 (medium)       | company representatives (majority with engineering university degree, 26 domain experts)                                       | 2           | BPMN                                                                        | nine comprehension tasks per model: <ul style="list-style-type: none"> <li>• three local tasks: can be answered based on single sub-process</li> <li>• three global tasks: can be answered based on modularized model</li> <li>• three global-local tasks: require information from modularized model and a sub-process</li> </ul> | time taken          | <ul style="list-style-type: none"> <li>• perceived ease of use (4 items)</li> <li>• perceived usefulness use (4 items)</li> </ul> | <ul style="list-style-type: none"> <li>• modularity [Secondary Notation, Mixed – balanced block design]</li> <li>• paper versus computer [Medium, Mixed – balanced block design]</li> <li>• experience and knowledge in process modeling and BPMN [User, Between]</li> <li>• familiarity with process and domain [User, Between]</li> </ul>                                                                                                                                                                                                                                                     |
| (Weitlaner et al. 2013)        | 77 (large)        | employees from companies in an Austrian group                                                                                  | 4           | UML, BPMN, EPC, SBD (storyboard design)                                     | six comprehension tasks: <ul style="list-style-type: none"> <li>• single-choice dichotomous (true/false) questions</li> <li>• multiple-choice (4 possible answers)</li> </ul>                                                                                                                                                      | -                   | -                                                                                                                                 | <ul style="list-style-type: none"> <li>• previous knowledge [User, Between]</li> <li>• level of education [User, Between]</li> <li>• control flow element (order, repetition, concurrency) [Task→Model, Within]</li> <li>• modeling notation (UML AD, BPMN, EPC, SBD (storyboard design)) [Notation, Between]</li> </ul>                                                                                                                                                                                                                                                                        |
| (Wiebring and Sandkuhl 2015)   | 113 (large)       | employees of a medium-sized organization from the utility industry                                                             | 1           | BPMN                                                                        | sixteen comprehension tasks (e.g., identifying and counting elements of the process, such as the roles                                                                                                                                                                                                                             | -                   | perception of process models (e.g., connection between tasks and roles)                                                           | <ul style="list-style-type: none"> <li>• modeling notation (flow Diagram, BPMN, UML AD, eEPC) [Notation, Between]</li> </ul>                                                                                                                                                                                                                                                                                                                                                                                                                                                                    |



| Source Reference | # of Participants | Type of Participants | # of Models | Notation of Models | Measurement of Objective Comprehension                                                           | Measurement of Time | Measurement of Subjective Comprehension and User Preferences | Independent Variables [Category: Medium/Notation/Secondary Notation/Label/Model/Task/User; Research Design: Between/Within/Mixed] |
|------------------|-------------------|----------------------|-------------|--------------------|--------------------------------------------------------------------------------------------------|---------------------|--------------------------------------------------------------|-----------------------------------------------------------------------------------------------------------------------------------|
|                  |                   |                      |             |                    | involved; yes/ no-questions on, e.g., mutual exclusion, interpreting the process flow correctly) |                     |                                                              |                                                                                                                                   |

## Appendix C: Empirical Articles on Comprehension – Variable-Based Overview

**Table 5** Main results of empirical articles

| Source Reference           | Category                          | Independent Variable                                         | Measurement of Independent Variable                 | Results                                                                                                                                                                                                                                                                                                                                                                                                                                                                           | Analysis Method        | Statistical Significance and Level of Evidence of Effect on Comprehension                                                                                                                                                                                                                                                   |                                                                                                                                                                                                                                                                                | # of Participants | # of Models |
|----------------------------|-----------------------------------|--------------------------------------------------------------|-----------------------------------------------------|-----------------------------------------------------------------------------------------------------------------------------------------------------------------------------------------------------------------------------------------------------------------------------------------------------------------------------------------------------------------------------------------------------------------------------------------------------------------------------------|------------------------|-----------------------------------------------------------------------------------------------------------------------------------------------------------------------------------------------------------------------------------------------------------------------------------------------------------------------------|--------------------------------------------------------------------------------------------------------------------------------------------------------------------------------------------------------------------------------------------------------------------------------|-------------------|-------------|
|                            |                                   |                                                              |                                                     |                                                                                                                                                                                                                                                                                                                                                                                                                                                                                   |                        | Objective                                                                                                                                                                                                                                                                                                                   | Subjective                                                                                                                                                                                                                                                                     |                   |             |
| <b>Presentation Medium</b> |                                   |                                                              |                                                     |                                                                                                                                                                                                                                                                                                                                                                                                                                                                                   |                        |                                                                                                                                                                                                                                                                                                                             |                                                                                                                                                                                                                                                                                |                   |             |
| (Mendling et al. 2012b)    | presentation medium               | paper versus computer                                        | computer: online questionnaire                      | no significant effect                                                                                                                                                                                                                                                                                                                                                                                                                                                             | ANOVA                  | not significant<br>→ no evidence                                                                                                                                                                                                                                                                                            | -                                                                                                                                                                                                                                                                              | 113 (very large)  | 6           |
| (Recker et al. 2014)       | presentation medium               | paper versus computer                                        | computer: online questionnaire                      | no significant effect                                                                                                                                                                                                                                                                                                                                                                                                                                                             | ANOVA                  | not significant<br>→ no evidence                                                                                                                                                                                                                                                                                            | -                                                                                                                                                                                                                                                                              | 92 (large)        | 2           |
| (Turetken et al. 2016)     | presentation medium               | paper versus computer                                        | computer: interactive web-based visualizations      | no significant differences between comprehension accuracy and efficiency (accuracy/time spent) for computer and paper versions                                                                                                                                                                                                                                                                                                                                                    | ANOVA                  | not significant<br>→ no evidence                                                                                                                                                                                                                                                                                            | <ul style="list-style-type: none"> <li>perceived usefulness: <math>F=9.54</math>, <math>p=0.002</math></li> <li>perceived ease of understanding: <math>F=4.32</math>, <math>p=0.038</math></li> </ul> → strong                                                                 | 60 (medium)       | 2           |
| <b>Notation</b>            |                                   |                                                              |                                                     |                                                                                                                                                                                                                                                                                                                                                                                                                                                                                   |                        |                                                                                                                                                                                                                                                                                                                             |                                                                                                                                                                                                                                                                                |                   |             |
| (Ottensosser et al. 2012)  | notation: representation paradigm | BPMN notation (graphical) versus written use cases (textual) | manipulated factor constituting experimental groups | <ul style="list-style-type: none"> <li>Reading a BPM model increased comprehension accuracy for users trained in process modeling but not significantly for users not trained in process modeling (H2).</li> <li>A BPM model increased comprehension accuracy more than a written use case did (H4).</li> <li>Reading a process model in written use case notation, followed by a BPM model, increases comprehension accuracy more than a written use case alone (H5).</li> </ul> | Wilcoxon rank-sum test | <ul style="list-style-type: none"> <li>H2: users trained in process modeling (<math>p&lt;0.001</math>), users not trained in process modeling (<math>p=0.15</math>)</li> <li>H4: users trained in process modeling (<math>p=0.05</math>), users not trained in process modeling (<math>p=0.77</math>)</li> </ul> → moderate | -                                                                                                                                                                                                                                                                              | 196 (very large)  | 6           |
| (Rodrigues et al. 2015)    | notation: representation paradigm | BPMN versus textual process-description modeling notation    | manipulated factor constituting experimental groups | <ul style="list-style-type: none"> <li>experienced group: BPM increases comprehension accuracy more than text does.</li> <li>inexperienced group: no significant difference</li> </ul>                                                                                                                                                                                                                                                                                            | Mann-Whitney test      | <ul style="list-style-type: none"> <li>experienced group: BPM leads to higher comprehension accuracy than text (79.2% versus 71.6%, <math>p=0.049</math>)</li> <li>inexperienced group: not significant</li> </ul> → moderate                                                                                               | -                                                                                                                                                                                                                                                                              | 73 (large)        | 1           |
| (Figl and Recker 2016)     | notation: representation paradigm | text, structured text, diagram (BPMN)                        | manipulated factor                                  | Users preferred BPMN over structured text and text (least preferred option).                                                                                                                                                                                                                                                                                                                                                                                                      | descriptive statistics | [empirical article on subjective comprehension and user preferences]                                                                                                                                                                                                                                                        | user preferences [scores from 0 to 100; scores > 50 indicate preference for the first option] <ul style="list-style-type: none"> <li>diagrammatic representations over text (<math>M=80.05</math>, <math>SD=2.71</math>)</li> <li>diagrammatic representations over</li> </ul> | 120 (very large)  | 1           |

| Source Reference       | Category                          | Independent Variable                                                                                         | Measurement of Independent Variable                                                                                                                                                                                                                                                                                                                            | Results                                                                                                                                                                                                                                                                                                                                                                                                                                                  | Analysis Method                                                      | Statistical Significance and Level of Evidence of Effect on Comprehension                                                       |                                                                                                                                                                                  | # of Participants | # of Models    |
|------------------------|-----------------------------------|--------------------------------------------------------------------------------------------------------------|----------------------------------------------------------------------------------------------------------------------------------------------------------------------------------------------------------------------------------------------------------------------------------------------------------------------------------------------------------------|----------------------------------------------------------------------------------------------------------------------------------------------------------------------------------------------------------------------------------------------------------------------------------------------------------------------------------------------------------------------------------------------------------------------------------------------------------|----------------------------------------------------------------------|---------------------------------------------------------------------------------------------------------------------------------|----------------------------------------------------------------------------------------------------------------------------------------------------------------------------------|-------------------|----------------|
|                        |                                   |                                                                                                              |                                                                                                                                                                                                                                                                                                                                                                |                                                                                                                                                                                                                                                                                                                                                                                                                                                          |                                                                      | Objective                                                                                                                       | Subjective                                                                                                                                                                       |                   |                |
|                        |                                   |                                                                                                              |                                                                                                                                                                                                                                                                                                                                                                |                                                                                                                                                                                                                                                                                                                                                                                                                                                          |                                                                      |                                                                                                                                 | structured text (M=74.42, SD=3.07)<br>• structured text over text (M=70.24, SD=3.42)<br>→ weak                                                                                   |                   |                |
| (Pichler et al. 2012)  | notation: representation paradigm | declarative versus imperative models                                                                         | manipulated factor constituting experimental groups                                                                                                                                                                                                                                                                                                            | Higher comprehension accuracy was achieved and less time was taken for imperative models than for declarative models.                                                                                                                                                                                                                                                                                                                                    | Sheirer-Ray-Hare test                                                | • comprehension accuracy: p=0.001<br>• [time taken: p=0.002]<br>→ strong                                                        | -                                                                                                                                                                                | 27 (small)        | 4              |
| (Figl and Recker 2016) | notation: representation paradigm | use of icons (with/without icons)                                                                            | manipulated factor                                                                                                                                                                                                                                                                                                                                             | weak preference for icons over no icons                                                                                                                                                                                                                                                                                                                                                                                                                  | descriptive statistics                                               | [empirical article on subjective comprehension and user preferences]                                                            | user preferences [scores from 0 to 100; scores > 50 indicate preference for the first option]<br>• icons over no icons (M=62.99, SD=3.50)<br>→ weak                              | 120 (very large)  | 1              |
| (Hipp et al. 2014)     | notation: representation paradigm | new visualizations (bubble visualization concept, BPMN3D, network visualization concepts, thin line concept) | manipulated factor:<br>• bubble visualization concept: activities as bubbles<br>• BPMN3D: BPMN, but data objects are outsourced in a third dimension<br>• network visualization concepts: one activity of interest is dynamically emphasized; others are grayed out<br>• thin line concept: sequence flow of process activities is separated from data objects | BPMN3D was evaluated best for all three dimensions, followed by Bubble, thin line, and finally network visualization.                                                                                                                                                                                                                                                                                                                                    | unclear                                                              | [empirical article on subjective comprehension and user preferences]                                                            | • perceived comprehensibility (p=0.04)<br>• perceived comprehensibility of sequence flow (p=0.012)<br>• perceived clarity and overview (p=0.011)<br>→ strong (BPMN3D rated best) | 22 (small)        | 1              |
| (Döhring et al. 2014)  | notation: primary notation        | C-YAWL and vBPMN                                                                                             | manipulated factor constituting experimental groups;<br>process-variant management notations with differing configuration and adaptation mechanisms; C-YAWL without modularization support, v-BPMN with modularization support in an execution                                                                                                                 | • There was a significant effect on task success (combination of comprehension and modeling tasks), time taken—although there was also an interaction effect with modeling versus the understanding task type, as modeling in the tool is especially time-consuming in C-YAWL—and easiness of tasks.<br>• There was no significant effect on task confidence.<br>• vBPMN easier to comprehend and participants took less time than they did with C-YAWL. | Mann-Whitney U-test, Wilcoxon rank-sum test, t-tests (paired), ANOVA | • task success: Wilcoxon-test: p=0.048 (after Bonferroni)<br>• [processing time: ANOVA: $F_{1,12}=19.94$ , p<0.001]<br>→ strong | easiness of tasks: Wilcoxon-test: p=0.025 (after Bonferroni)<br>→ strong                                                                                                         | 14 (small)        | 2 (1 per tool) |

| Source Reference             | Category                   | Independent Variable                                                                       | Measurement of Independent Variable                                                                                                       | Results                                                                                                                                                                                                                                                                                                                                                                                                                                                                                                                                                                                                                                                                        | Analysis Method             | Statistical Significance and Level of Evidence of Effect on Comprehension                                                                                                                                                                                                                                                                                                                |                                                                                                                                                                   | # of Participants | # of Models |
|------------------------------|----------------------------|--------------------------------------------------------------------------------------------|-------------------------------------------------------------------------------------------------------------------------------------------|--------------------------------------------------------------------------------------------------------------------------------------------------------------------------------------------------------------------------------------------------------------------------------------------------------------------------------------------------------------------------------------------------------------------------------------------------------------------------------------------------------------------------------------------------------------------------------------------------------------------------------------------------------------------------------|-----------------------------|------------------------------------------------------------------------------------------------------------------------------------------------------------------------------------------------------------------------------------------------------------------------------------------------------------------------------------------------------------------------------------------|-------------------------------------------------------------------------------------------------------------------------------------------------------------------|-------------------|-------------|
|                              |                            |                                                                                            |                                                                                                                                           |                                                                                                                                                                                                                                                                                                                                                                                                                                                                                                                                                                                                                                                                                |                             | Objective                                                                                                                                                                                                                                                                                                                                                                                | Subjective                                                                                                                                                        |                   |             |
|                              |                            |                                                                                            | tool; also included modeling tasks                                                                                                        |                                                                                                                                                                                                                                                                                                                                                                                                                                                                                                                                                                                                                                                                                |                             |                                                                                                                                                                                                                                                                                                                                                                                          |                                                                                                                                                                   |                   |             |
| (Sarshar and Loos 2005)      | notation: primary notation | EPC versus Petrinet                                                                        | manipulated factor constituting experimental groups                                                                                       | <ul style="list-style-type: none"> <li>There was higher comprehension accuracy for EPC than for Petrinets. (XOR situations were understood better in EPC, and AND was understood equally well.)</li> <li>Perceived ease-of-use of the EPC notation was higher (tendency).</li> <li>There was no significant difference concerning perceived ease-of-use of control flow.</li> </ul>                                                                                                                                                                                                                                                                                            | information missing         | no numbers<br>→ weak                                                                                                                                                                                                                                                                                                                                                                     | <ul style="list-style-type: none"> <li>perceived ease of use: statistical trend</li> <li>perceived ease of use of control flow: not significant</li> </ul> → weak | 50 (medium)       | 1           |
| (Recker and Dreiling 2007)   | notation: primary notation | modeling notation (EPC versus BPMN; participants were familiar with EPC but not with BPMN) | informationally equivalent experimental groups; higher number of semantically different language constructs used in BPMN than in EPC      | There was no significant effect; although BPMN was unfamiliar to participants, it received higher (though not significantly higher) comprehension accuracy.                                                                                                                                                                                                                                                                                                                                                                                                                                                                                                                    | ANCOVA                      | not significant<br>→ no evidence                                                                                                                                                                                                                                                                                                                                                         | not significant<br>→ no evidence (numbers available for only one of two models)                                                                                   | 69 (medium)       | 2           |
| (Recker and Dreiling 2011)   | notation: primary notation | modeling notation (EPC versus BPMN; participants were familiar with EPC but not with BPMN) | informationally equivalent experimental groups; higher number of semantically different language constructs used in BPMN than in EPC      | <ul style="list-style-type: none"> <li>BPMN had a positive effect on model-based transferability test scores. (Previous knowledge of a modeling notation assists users in understanding the business context as depicted in this model; however, it does not assist in developing deep transfer abilities.)</li> </ul> There was no significant effect on: <ul style="list-style-type: none"> <li>comprehension accuracy (model comprehension, inferential transfer ability test scores, retention test scores);</li> <li>task completion times (model comprehension, transfer ability test scores, retention ability test scores);</li> <li>ease of understanding.</li> </ul> | MANCOVA                     | <ul style="list-style-type: none"> <li>no effect on comprehension accuracy</li> <li>effect on model-based transfer ability test scores:               <ul style="list-style-type: none"> <li>goods receipt task: <math>F_{1,11}=2.76</math>, <math>p=0.01</math></li> <li>claims handling task: <math>F_{1,11}=3.69</math>, <math>p&lt;0.001</math></li> </ul> </li> </ul> → no evidence | not significant<br>→ no evidence                                                                                                                                  | 68 (medium)       | 2           |
| (Recker et al. 2005)         | notation: primary notation | C-EPC versus EPC                                                                           | manipulated factor; configurable EPC (C-EPC) versus EPC                                                                                   | <ul style="list-style-type: none"> <li>C-EPC was found to be more useful than EPC.</li> <li>Some visualizations should be improved (e.g., definitions for configurable gateways).</li> </ul>                                                                                                                                                                                                                                                                                                                                                                                                                                                                                   | descriptive statistics only | [empirical article on subjective comprehension and user preferences]                                                                                                                                                                                                                                                                                                                     | no numbers (only a subset of numbers for results were in the paper)<br>→ weak                                                                                     | 16 (small)        | 2           |
| (Weitlaner et al. 2013)      | notation: primary notation | UML AD, BPMN, EPC, SBD (storyboard design)                                                 | <ul style="list-style-type: none"> <li>manipulated factor constituting experimental groups</li> <li>informationally equivalent</li> </ul> | Accuracy was highest for SBD and lowest for EPC.                                                                                                                                                                                                                                                                                                                                                                                                                                                                                                                                                                                                                               | descriptive statistics only | no numbers<br>→ weak                                                                                                                                                                                                                                                                                                                                                                     | -                                                                                                                                                                 | 77 (large)        | 4           |
| (Sandkuhl and Wiebring 2015) | notation: primary notation | flow diagrams, eEPC, UML AD, BPMN                                                          | manipulated factor constituting experimental groups                                                                                       | <ul style="list-style-type: none"> <li>Comprehension accuracy: highest accuracy for UML AD (<math>M=11.93</math>), followed by eEPC (<math>M=11.50</math>), flow diagram (<math>M=11.32</math>), and finally BPMN (<math>M=11.29</math>).</li> <li>Perception of notation: highest performance for eEPC (<math>M=2.70</math>), UML AD (<math>M=2.29</math>), followed by</li> </ul>                                                                                                                                                                                                                                                                                            | descriptive statistics only | descriptive statistics only<br>→ weak                                                                                                                                                                                                                                                                                                                                                    | “perception”: descriptive statistics only<br>→ weak                                                                                                               | 113 (large)       | 1           |

| Source Reference        | Category                   | Independent Variable                                                  | Measurement of Independent Variable                                                                                                                                                                                                                                                                                                                     | Results                                                                                                                                                                                                                                                                                                                                                                                                                                          | Analysis Method                                        | Statistical Significance and Level of Evidence of Effect on Comprehension                                                                                                                                                                                                                                                                                                                                                                       |                                  | # of Participants | # of Models |
|-------------------------|----------------------------|-----------------------------------------------------------------------|---------------------------------------------------------------------------------------------------------------------------------------------------------------------------------------------------------------------------------------------------------------------------------------------------------------------------------------------------------|--------------------------------------------------------------------------------------------------------------------------------------------------------------------------------------------------------------------------------------------------------------------------------------------------------------------------------------------------------------------------------------------------------------------------------------------------|--------------------------------------------------------|-------------------------------------------------------------------------------------------------------------------------------------------------------------------------------------------------------------------------------------------------------------------------------------------------------------------------------------------------------------------------------------------------------------------------------------------------|----------------------------------|-------------------|-------------|
|                         |                            |                                                                       |                                                                                                                                                                                                                                                                                                                                                         |                                                                                                                                                                                                                                                                                                                                                                                                                                                  |                                                        | Objective                                                                                                                                                                                                                                                                                                                                                                                                                                       | Subjective                       |                   |             |
|                         |                            |                                                                       |                                                                                                                                                                                                                                                                                                                                                         | BPMN (M=2.19), and finally flow diagram (M=2.14).                                                                                                                                                                                                                                                                                                                                                                                                |                                                        |                                                                                                                                                                                                                                                                                                                                                                                                                                                 |                                  |                   |             |
| (Natschläger 2011)      | notation: primary notation | BPMN, deontic BPMN                                                    | deontic BPMN: highlights mandatory and optional activities with color and uses textual decisions and deontic constructs in the corresponding activity symbols (e.g., "O" for obligatory activities, P) for permissive activities, (A B) for preconditions). For instance, optionality is not expressed through gateways, but through textual decisions. | Deontic BPMN could reduce comprehension errors (higher comprehension accuracy); however, preconditions were difficult to understand in deontic BPMN.                                                                                                                                                                                                                                                                                             | descriptive statistics only                            | 204 versus 176 comprehension errors in BPMN compared to deontic BPMN (-13.7%)<br>→ weak                                                                                                                                                                                                                                                                                                                                                         | -                                | 22 (small)        | 2*4 models  |
| (Jošt et al. 2016)      | notation: primary notation | BPMN, UML AD, EPC                                                     | manipulated factor constituting experimental groups                                                                                                                                                                                                                                                                                                     | <ul style="list-style-type: none"> <li>Model 1: Comprehension accuracy was higher for UML AD than for EPC or BPMN.</li> <li>Model 2: Time taken was lower for EPC than for BPMN.</li> <li>Model 3: Comprehension accuracy was higher for UML AD than for EPC.</li> <li>Model 4: no significant differences</li> </ul>                                                                                                                            | Mann Whitney post hoc tests with Bonferroni correction | <ul style="list-style-type: none"> <li>Model 1: comprehension accuracy was higher for UML AD than for EPC (std. test statistics=3.052, p=0.007) and BPMN (std. test statistics=2.708, p=0.02)</li> <li>[Model 2: time taken was lower for EPC than for BPMN (std. test statistics=-2.602, p=0.028)]</li> <li>Model 3: comprehension accuracy was higher for UML AD than for EPC (std. test statistics=3.511, p=0.001)<br/>→ moderate</li> </ul> | -                                | 103 (large)       | 4           |
| (Stitzlein et al. 2013) | notation: primary notation | BPMN, health process notation (HPN)                                   | manipulated factor constituting experimental groups                                                                                                                                                                                                                                                                                                     | <ul style="list-style-type: none"> <li>There was no significant overall effect on comprehension accuracy but there was a trendwise effect on comprehension efficiency (accuracy/time taken).</li> <li>BPMN models increased comprehension accuracy for simple tasks; HPN models increased it for complex tasks.</li> <li>There were statistically significant differences for neither perceived ease of use nor perceived usefulness.</li> </ul> | ANOVA                                                  | <p>comprehension accuracy:</p> <ul style="list-style-type: none"> <li>overall effect: not significant</li> <li>simple tasks: <math>F_{1,12}=14.11</math>, <math>p=0.003</math></li> <li>complex tasks: <math>F_{1,12}=8.90</math>, <math>p=0.01</math></li> </ul> <p>[comprehension efficiency: <math>F_{1,12}=10.73</math>, <math>p=0.007</math>]<br/>→ conflicting</p>                                                                        | not significant<br>→ no evidence | 16 (small)        | 2           |
| (Kock et al. 2008)      | notation: primary notation | activity flow representation versus communication flow representation | activity flow representation versus communication flow representation                                                                                                                                                                                                                                                                                   | Communication-flow orientation was not perceived as significantly more difficult to understand than activity-flow representation. (No information was offered on whether it was easier.)                                                                                                                                                                                                                                                         | unclear                                                | [empirical article on subjective comprehension and user preferences]                                                                                                                                                                                                                                                                                                                                                                            | not significant<br>→ no evidence | 210 (very large)  | 1           |

| Source Reference    | Category                                               | Independent Variable                                                          | Measurement of Independent Variable                                                                                                                                                                                                                          | Results                                                                                                                                                                                                                                                                                                                                                                                                                                                                                                                                                                                               | Analysis Method     | Statistical Significance and Level of Evidence of Effect on Comprehension                                                                                                                                                                                                                                                                 |                                                                                                                                                                                               | # of Participants | # of Models |
|---------------------|--------------------------------------------------------|-------------------------------------------------------------------------------|--------------------------------------------------------------------------------------------------------------------------------------------------------------------------------------------------------------------------------------------------------------|-------------------------------------------------------------------------------------------------------------------------------------------------------------------------------------------------------------------------------------------------------------------------------------------------------------------------------------------------------------------------------------------------------------------------------------------------------------------------------------------------------------------------------------------------------------------------------------------------------|---------------------|-------------------------------------------------------------------------------------------------------------------------------------------------------------------------------------------------------------------------------------------------------------------------------------------------------------------------------------------|-----------------------------------------------------------------------------------------------------------------------------------------------------------------------------------------------|-------------------|-------------|
|                     |                                                        |                                                                               |                                                                                                                                                                                                                                                              |                                                                                                                                                                                                                                                                                                                                                                                                                                                                                                                                                                                                       |                     | Objective                                                                                                                                                                                                                                                                                                                                 | Subjective                                                                                                                                                                                    |                   |             |
| (Kock et al. 2009)  | notation: primary notation                             | high versus low communication-flow orientation                                | <ul style="list-style-type: none"> <li>high communication-flow orientation: communication-flow diagrams</li> <li>low communication-flow orientation: functional flowcharts with swim lanes</li> </ul>                                                        | Comprehension accuracy was higher for models with a greater communication-flow orientation.                                                                                                                                                                                                                                                                                                                                                                                                                                                                                                           | SEM                 | [empirical article on subjective comprehension and user preferences]                                                                                                                                                                                                                                                                      | $\beta=0.269, p<0.01$<br>→ strong                                                                                                                                                             | 78 (large)        | 1           |
| (Figl et al. 2013a) | notation: primary notation/ notational characteristics | perceptual discriminability deficiencies                                      | notation with perceptual discriminability deficiencies (YAWL), and two notations without global deficiencies (UML AD, BPMN) as a reference value                                                                                                             | <ul style="list-style-type: none"> <li>Perceptual discriminability deficiencies significantly influenced comprehension accuracy of the large model and tended to influence comprehension accuracy of the small model, but not the accuracy in the text-model comparison task.</li> <li>There was a significant effect for time taken with the large model and the text-model comparison (average increase of 1 minute).</li> <li>There was a significant effect of perceptual discriminability deficiencies on cognitive load for the tasks with both the small model and the large model.</li> </ul> | ANCOVA              | comprehension accuracy: <ul style="list-style-type: none"> <li>small model (F=4.53, p=0.06)</li> <li>large model (F=6.69, p=0.01)</li> <li>text-model comparison: not significant</li> </ul> [time taken: <ul style="list-style-type: none"> <li>large model (F=7.02, p=0.01)</li> <li>text-model comparison (F=5.17, p=0.03)] </li></ul> | cognitive load: <ul style="list-style-type: none"> <li>small model (F=3.97, p=0.05)</li> <li>large model (F=5.26, p=0.02)</li> <li>text-model comparison: not significant</li> </ul> → strong | 136 (very large)  | 3           |
| (Figl et al. 2013a) | notation: primary notation/ notational characteristics | semiotic clarity deficiencies                                                 | notation with semiotic clarity deficiencies (EPC) and 2 notations without global deficiencies (UML AD, BPMN) as reference values                                                                                                                             | <ul style="list-style-type: none"> <li>Semiotic clarity deficiencies had a statistically significant influence on comprehension accuracy of the large model but not on comprehension accuracy of the small model or the text-model comparison task.</li> <li>Semiotic clarity deficiencies were found to have a trendwise influence on time taken in only one of three tasks (text-model comparison).</li> <li>Symbol sets with semiotic clarity deficiencies imposed a higher cognitive load (trendwise).</li> </ul>                                                                                 | ANCOVA              | comprehension accuracy: <ul style="list-style-type: none"> <li>small model: not significant</li> <li>large model (F=7.03, p=0.01)</li> <li>text-model comparison: not significant</li> </ul> [time taken for text-model comparison (F=3.47, p= 0.07)]                                                                                     | cognitive load: <ul style="list-style-type: none"> <li>small model: F=2.89, p=0.09</li> <li>large model: F=5.01, p=0.07</li> <li>text-model comparison: F=2.89, p=0.09</li> </ul> → weak      | 136 (very large)  | 3           |
| (Recker 2013)       | notation: notational characteristics                   | implicit/explicit representation of parallel split and simple merge scenarios | manipulated factor constituting experimental groups; <ul style="list-style-type: none"> <li>explicit: with BPMN gateway constructs; perceptual discriminability effect through use of gateways</li> <li>implicit: without BPMN gateway constructs</li> </ul> | <ul style="list-style-type: none"> <li>The use (versus non-use) of gateway constructs had a consistently significant effect on comprehension accuracy: in all cases, comprehension accuracy increased when gateway constructs were used in the model.</li> <li>The effects on time taken and perceived ease of understanding were not significant.</li> </ul>                                                                                                                                                                                                                                         | ANCOVA              | F=3.78, p=0.005, $\eta^2=0.03$<br>→ strong                                                                                                                                                                                                                                                                                                | not significant<br>→ no evidence                                                                                                                                                              | 98 (large)        | 2*3 models  |
| (Figl et al. 2013b) | notation: notational characteristics                   | symbol aesthetics                                                             | self-developed user evaluation of symbols questionnaire on four dimensions: semantic transparency, perceptual discriminability, pop-out, and aesthetics with 3-4                                                                                             | The aesthetic design of symbols lowered the perceived cognitive load but did not significantly affect comprehension accuracy.                                                                                                                                                                                                                                                                                                                                                                                                                                                                         | regression analysis | not significant<br>→ no evidence                                                                                                                                                                                                                                                                                                          | perceived cognitive load: aesthetic design of symbols ( $\beta=0.09, p\leq 0.05$ )<br>→ strong                                                                                                | 154 (very large)  | 4           |

| Source Reference          | Category                             | Independent Variable                                                             | Measurement of Independent Variable                                                                                                                                                                                                                                       | Results                                                                                                                                                                                                                                    | Analysis Method                                                 | Statistical Significance and Level of Evidence of Effect on Comprehension                                                                                                                           |                                                                                                                                                                                                                     | # of Participants | # of Models |
|---------------------------|--------------------------------------|----------------------------------------------------------------------------------|---------------------------------------------------------------------------------------------------------------------------------------------------------------------------------------------------------------------------------------------------------------------------|--------------------------------------------------------------------------------------------------------------------------------------------------------------------------------------------------------------------------------------------|-----------------------------------------------------------------|-----------------------------------------------------------------------------------------------------------------------------------------------------------------------------------------------------|---------------------------------------------------------------------------------------------------------------------------------------------------------------------------------------------------------------------|-------------------|-------------|
|                           |                                      |                                                                                  |                                                                                                                                                                                                                                                                           |                                                                                                                                                                                                                                            |                                                                 | Objective                                                                                                                                                                                           | Subjective                                                                                                                                                                                                          |                   |             |
|                           |                                      |                                                                                  | items on each dimension (and a 5-point Likert scale)                                                                                                                                                                                                                      |                                                                                                                                                                                                                                            |                                                                 |                                                                                                                                                                                                     |                                                                                                                                                                                                                     |                   |             |
| (Figl et al. 2013b)       | notation: notational characteristics | perceptual pop-out of symbols                                                    | self-developed user evaluation of symbols questionnaire on four dimensions: semantic transparency, perceptual discriminability, pop-out, and aesthetics with 3-4 items on each dimension (and a 5-point Likert scale)                                                     | Pop-out improved comprehension accuracy and perceived control flow comprehension and lowered the perceived cognitive load.                                                                                                                 | regression analysis                                             | comprehension accuracy: $\beta=0.09, p \leq 0.05$<br>→ strong                                                                                                                                       | <ul style="list-style-type: none"> <li>perceived control flow comprehension: <math>\beta=0.13, p \leq 0.001</math></li> <li>perceived cognitive load: <math>\beta=0.13, p \leq 0.001</math></li> </ul> → strong     | 154 (very large)  | 4           |
| (Figl et al. 2013b)       | notation: notational characteristics | semantic transparency of symbols                                                 | self-developed user evaluation of symbols questionnaire on four dimensions: semantic transparency, perceptual discriminability, pop-out, and aesthetics with 3-4 items on each dimension (and a 5-point Likert scale)                                                     | Semantic transparency lowered the perceived cognitive load but did not significantly affect comprehension accuracy.                                                                                                                        | regression analysis                                             | not significant<br>→ no evidence                                                                                                                                                                    | perceived cognitive load: semantic transparency ( $\beta=0.11, p \leq 0.001$ )<br>→ strong                                                                                                                          | 154 (very large)  | 4           |
| (Figl et al. 2013b)       | notation: notational characteristics | perceptual discriminability of symbols                                           | self-developed user evaluation of symbols questionnaire on four dimensions: semantic transparency, perceptual discriminability, pop-out, and aesthetics with 3-4 items on each dimension (and a 5-point Likert scale)                                                     | Perceptual discriminability improved comprehension accuracy and perceived control flow comprehension and lowered the perceived cognitive load.                                                                                             | regression analysis                                             | comprehension accuracy: $\beta=0.09, p \leq 0.05$<br>→ strong                                                                                                                                       | <ul style="list-style-type: none"> <li>perceived control flow comprehension: <math>\beta=0.10, p \leq 0.05</math></li> <li>perceived cognitive load: <math>\beta=0.14, p \leq 0.00</math></li> </ul> → strong       | 154 (very large)  | 4           |
| (Kock et al. 2009)        | notation: notational characteristics | ease of generating the models                                                    | <ul style="list-style-type: none"> <li>experimental task: redesigning a process in groups, with two modeling approaches</li> <li>ease of generating the models (4 items on a 7-point scale (e.g. "It is easy to conceptualize a process using this approach"))</li> </ul> | A model that is perceived as easier to generate was also perceived as easier to understand.                                                                                                                                                | SEM                                                             | [empirical article on subjective comprehension and user preferences]                                                                                                                                | $\beta=0.503, p < 0.01$<br>→ strong                                                                                                                                                                                 | 78 (large)        | 1           |
| <b>Secondary Notation</b> |                                      |                                                                                  |                                                                                                                                                                                                                                                                           |                                                                                                                                                                                                                                            |                                                                 |                                                                                                                                                                                                     |                                                                                                                                                                                                                     |                   |             |
| (Johannsen et al. 2014a)  | secondary notation: decomposition    | decomposition: full compliance versus moderate violation versus strong violation | three groups: 0/3/5 conditions violated; <ul style="list-style-type: none"> <li>moderate violation: minimality, determinism, losslessness violated</li> <li>strong violation: minimality,</li> </ul>                                                                      | Full compliance and moderate violation increased comprehension accuracy and the models were perceived to be easier to understand than in the strong-violation group; there was no significant effect (unclear result) for problem-solving. | regression analysis (with strong-violation group as base level) | comprehension accuracy: <ul style="list-style-type: none"> <li>no-violation group: <math>t=3.68, p=0.001</math></li> <li>moderate-violation group: <math>t=3.45, p=0.001</math></li> </ul> → strong | perceived ease of understanding: <ul style="list-style-type: none"> <li>no-violation group: <math>t=3.698, p=0.001</math></li> <li>moderate-violation group: <math>t=9.994, p &lt; 0.001</math></li> </ul> → strong | 51-53 (medium)    | 1           |

| Source Reference          | Category                           | Independent Variable                      | Measurement of Independent Variable                                                                                                                                                                                                                                                                                                               | Results                                                                                                                                                                                                                                                                                                                                                                                                                                                                                                                                                                                          | Analysis Method                           | Statistical Significance and Level of Evidence of Effect on Comprehension                                                                                                                                                                                                                                                                                                                                                                                                                             |                                                                                                                                                                                                                      | # of Participants                           | # of Models                                                 |
|---------------------------|------------------------------------|-------------------------------------------|---------------------------------------------------------------------------------------------------------------------------------------------------------------------------------------------------------------------------------------------------------------------------------------------------------------------------------------------------|--------------------------------------------------------------------------------------------------------------------------------------------------------------------------------------------------------------------------------------------------------------------------------------------------------------------------------------------------------------------------------------------------------------------------------------------------------------------------------------------------------------------------------------------------------------------------------------------------|-------------------------------------------|-------------------------------------------------------------------------------------------------------------------------------------------------------------------------------------------------------------------------------------------------------------------------------------------------------------------------------------------------------------------------------------------------------------------------------------------------------------------------------------------------------|----------------------------------------------------------------------------------------------------------------------------------------------------------------------------------------------------------------------|---------------------------------------------|-------------------------------------------------------------|
|                           |                                    |                                           |                                                                                                                                                                                                                                                                                                                                                   |                                                                                                                                                                                                                                                                                                                                                                                                                                                                                                                                                                                                  |                                           | Objective                                                                                                                                                                                                                                                                                                                                                                                                                                                                                             | Subjective                                                                                                                                                                                                           |                                             |                                                             |
|                           |                                    |                                           | determinism, losslessness, minimum coupling, strong cohesion violated                                                                                                                                                                                                                                                                             |                                                                                                                                                                                                                                                                                                                                                                                                                                                                                                                                                                                                  |                                           |                                                                                                                                                                                                                                                                                                                                                                                                                                                                                                       |                                                                                                                                                                                                                      |                                             |                                                             |
| (Reijers et al. 2011b)    | secondary notation: decomposition  | modularization                            | manipulated factor constituting experimental groups; model with sub-processes versus flattened model without sub-processes                                                                                                                                                                                                                        | There was a significant difference for one of the models: Modularity was positively connected with comprehension accuracy. (This model had a higher fan in-out metric and a higher number of subprocesses, so the difference between flattened and modular version was larger.)                                                                                                                                                                                                                                                                                                                  | t-test (based on a median-split variable) | one of the models: $p=0.001$<br>→ moderate                                                                                                                                                                                                                                                                                                                                                                                                                                                            | -                                                                                                                                                                                                                    | 28 (small)                                  | 2                                                           |
| (Tureken et al. 2016)     | secondary notation: decomposition  | modularity presentation                   | manipulated factor constituting experimental groups; fully flattened model versus flattened view with visual “groups” for expanded sub-processes versus models with sub-processes (sub-processes collapsed and shown in separate models)                                                                                                          | There was a significant effect of modularity on <ul style="list-style-type: none"> <li>comprehension accuracy—both flattened models increase comprehension accuracy more than the use of collapsed sub-processes, the largest difference for scores of local questions, which involve information about sub-processes—</li> <li>perceived usefulness—the difference between fully flattened models versus sub-processes collapsed was significant—</li> <li>perceived ease of understanding—the difference between fully flattened models versus both other versions was significant.</li> </ul> | Kruskal-Wallis test                       | comprehension accuracy: $H=8.49$ , $p=0.001$<br>[comprehension efficiency: not significant]<br>→ strong                                                                                                                                                                                                                                                                                                                                                                                               | <ul style="list-style-type: none"> <li>perceived usefulness: <math>F=13.12</math>, <math>p=0.001</math></li> <li>perceived ease of understanding: <math>F=13.59</math>, <math>p=0.001</math><br/>→ strong</li> </ul> | 60 (medium)                                 | 2                                                           |
| (Bera 2012)               | secondary notation: Gestalt theory | with swim lanes versus without swim lanes | with swim lanes versus without swim lanes (lanes were cut, but actors were left on the side of the models)                                                                                                                                                                                                                                        | <ul style="list-style-type: none"> <li>Swim lanes reduced the time taken for answering comprehension tasks but did not significantly affect comprehension accuracy.</li> <li>Performance in problem-solving tasks was higher, but there was no significant effect on time taken.</li> </ul>                                                                                                                                                                                                                                                                                                      | ANCOVA                                    | comprehension accuracy: not significant <ul style="list-style-type: none"> <li>[time taken: <ul style="list-style-type: none"> <li>Model 1: 11.00, <math>p&lt;0.01</math></li> <li>Model 2: 11.29, <math>p&lt;0.01</math></li> </ul> </li> <li>problem-solving tasks: <ul style="list-style-type: none"> <li>Model 1: 8.40, <math>p=0.01</math></li> <li>Model 2: 10.15, <math>p&lt;0.01</math></li> </ul> </li> </ul> → no evidence                                                                  | -                                                                                                                                                                                                                    | 51 (medium)                                 | 2                                                           |
| (Jeyaraj and Sauter 2014) | secondary notation: Gestalt theory | with swim lanes versus without swim lanes | <ul style="list-style-type: none"> <li>without swim lanes: names of actors shown as first words in the activity labels</li> <li>study 1: similar physical position of activities, decisions, and arrows</li> <li>study 2: different physical position of activities, decisions and arrows</li> <li>identification of internal/external</li> </ul> | <ul style="list-style-type: none"> <li>higher comprehension of non-swim lane diagrams for selected information</li> <li>study 1: no significant differences, with the exception of identification of external actors</li> <li>study 2: no significant differences, with the exception of identification of external actors and external activities and time taken identifying activities (participants took longer for non-swim lane diagrams)</li> </ul>                                                                                                                                        | t-test                                    | comprehension accuracy: not significant <ul style="list-style-type: none"> <li>[identification of external actors: <math>t=-3.70</math>, <math>p&lt;0.001</math> (study 1)</li> <li>identification of external actors: <math>t=-2.34</math>, <math>p&lt;0.05</math> (study 2)</li> <li>identification of external activities: <math>t=-3.48</math>, <math>p&lt;0.001</math> (study 2)</li> <li>time taken identifying activities: <math>t=-3.47</math>, <math>p&lt;0.001</math> (study 2)]</li> </ul> | -                                                                                                                                                                                                                    | 142 in study 1, 131 in study 2 (very large) | 1 model on a manufacturing process (with/without swim lane) |



| Source Reference          | Category                            | Independent Variable                   | Measurement of Independent Variable                                                                                            | Results                                                                                                                                                                                                                                                                                                                                             | Analysis Method               | Statistical Significance and Level of Evidence of Effect on Comprehension                                                                                                                                            |                                                                                                                                                                                                                                                                                                 | # of Participants | # of Models |
|---------------------------|-------------------------------------|----------------------------------------|--------------------------------------------------------------------------------------------------------------------------------|-----------------------------------------------------------------------------------------------------------------------------------------------------------------------------------------------------------------------------------------------------------------------------------------------------------------------------------------------------|-------------------------------|----------------------------------------------------------------------------------------------------------------------------------------------------------------------------------------------------------------------|-------------------------------------------------------------------------------------------------------------------------------------------------------------------------------------------------------------------------------------------------------------------------------------------------|-------------------|-------------|
|                           |                                     |                                        |                                                                                                                                |                                                                                                                                                                                                                                                                                                                                                     |                               | Objective                                                                                                                                                                                                            | Subjective                                                                                                                                                                                                                                                                                      |                   |             |
|                           |                                     |                                        | actors as well as activities                                                                                                   |                                                                                                                                                                                                                                                                                                                                                     |                               | → moderate                                                                                                                                                                                                           |                                                                                                                                                                                                                                                                                                 |                   | version     |
| (Kummer et al. 2016)      | secondary notation: Gestalt theory  | different colors for different symbols | black/white versus bright colors with high contrast based on Asian preferences                                                 | <ul style="list-style-type: none"> <li>Color had no significant main effect on comprehension accuracy.</li> <li>Members of Confucian cultures perceived colored models as less difficult than uncolored models.</li> <li>Members of Confucian cultures perceived colored models as less difficult than members of Germanic cultures did.</li> </ul> | MANCOVA                       | not significant<br>→ no evidence                                                                                                                                                                                     | perceived difficulty: <ul style="list-style-type: none"> <li>Model 1: interaction effect between culture and color: <math>F_{1, 115}=9.22, p &lt; 0.001</math></li> <li>Model 2: interaction effect between culture and color: <math>F_{1, 115}= 4.90, p &lt; 0.05</math></li> </ul> → moderate | 127 (very large)  | 2           |
| (Reijers et al. 2011a)    | secondary notation: Gestalt theory  | syntax highlighting                    | highlighting of matching operator pairs in different colors (e.g., AND-split/AND-join pair)                                    | <ul style="list-style-type: none"> <li>overall: higher comprehension accuracy with highlighting</li> <li>novices: higher comprehension accuracy; no significant difference in time taken</li> <li>experts: significant difference in neither comprehension accuracy nor time taken</li> </ul>                                                       | Mann-Whitney test, two-tailed | effect of highlighting on comprehension accuracy <ul style="list-style-type: none"> <li>overall: <math>p=0.049</math></li> <li>novices: <math>p=0.017</math></li> <li>experts: not significant</li> </ul> → moderate | -                                                                                                                                                                                                                                                                                               | 70 (medium)       | 1           |
| (Petrusel et al. 2016)    | secondary notation: Gestalt theory  | color highlighting                     | model elements in the task-relevant region are colored red                                                                     | <ul style="list-style-type: none"> <li>Colored relevant model elements did not significantly affect comprehension accuracy but lowered time taken.</li> <li>"Mental effort," measured by fixations and fixation durations, decreased significantly.</li> </ul>                                                                                      | Wilcoxon test                 | comprehension accuracy: not significant<br>[time taken: $Z=3.039, p=0.002$ ]<br>→ no evidence                                                                                                                        | -                                                                                                                                                                                                                                                                                               | 75 (large)        | 16          |
| (Petrusel et al. 2016)    | secondary notation: layout          | task-specific layout                   | model elements in the task-relevant region are larger-sized than the rest of the gateways and repositioned close to each other | <ul style="list-style-type: none"> <li>Task-specific layout of relevant model elements significantly affected neither comprehension accuracy nor time taken.</li> <li>"Mental effort," measured by fixations and fixation durations, decreased significantly.</li> </ul>                                                                            | Wilcoxon test                 | comprehension accuracy: not significant<br>→ no evidence                                                                                                                                                             | -                                                                                                                                                                                                                                                                                               | 75 (large)        | 16          |
| (Figl and Strembeck 2015) | secondary notation: layout          | flow direction                         | manipulated factor constituting experimental groups, left-to-right, right-to-left, top-to-bottom, bottom-to-top                | There was no significant main effect of flow direction on comprehension accuracy, perceived ease of use of model, or time taken.                                                                                                                                                                                                                    | ANCOVA                        | not significant<br>→ no evidence                                                                                                                                                                                     | not significant<br>→ no evidence                                                                                                                                                                                                                                                                | 44 (medium)       | 2           |
| <b>Label</b>              |                                     |                                        |                                                                                                                                |                                                                                                                                                                                                                                                                                                                                                     |                               |                                                                                                                                                                                                                      |                                                                                                                                                                                                                                                                                                 |                   |             |
| (Mendling et al. 2010c)   | label: syntactic naming conventions | labels of various styles               | <ul style="list-style-type: none"> <li>verb-object style</li> <li>action-noun style</li> <li>other styles</li> </ul>           | There was a significant effect of label style on perceived usefulness. (Verb-object label style was rated highest in perceived usefulness, followed by action-noun label style, and finally the rest of the labels.)                                                                                                                                | ANOVA                         | [empirical article on subjective comprehension and user preferences]                                                                                                                                                 | perceived usefulness: $F=18.495, p<0.001$ (analysis based on labels: 6 labels×29 participants=174 data points)<br>→ strong                                                                                                                                                                      | 29 (small)        | 1           |
| (Mendling et al. 2010c)   | label:                              | perceived ambiguity of labels          | participants were asked to identify the three most ambiguous labels                                                            | Usefulness was rated higher for unambiguous labels than for ambiguous labels.                                                                                                                                                                                                                                                                       | ANOVA                         | [empirical article on subjective comprehension and user preferences]                                                                                                                                                 | usefulness: $F=31.553, p<0.001$                                                                                                                                                                                                                                                                 | 29 (small)        | 1           |

| Source Reference              | Category                             | Independent Variable                                                | Measurement of Independent Variable                                                                                                                                                                                      | Results                                                                                                                                                                                                                                                                                                                                                                                                                                      | Analysis Method                | Statistical Significance and Level of Evidence of Effect on Comprehension                                                                                                                                                                     |                                                                                        | # of Participants | # of Models |
|-------------------------------|--------------------------------------|---------------------------------------------------------------------|--------------------------------------------------------------------------------------------------------------------------------------------------------------------------------------------------------------------------|----------------------------------------------------------------------------------------------------------------------------------------------------------------------------------------------------------------------------------------------------------------------------------------------------------------------------------------------------------------------------------------------------------------------------------------------|--------------------------------|-----------------------------------------------------------------------------------------------------------------------------------------------------------------------------------------------------------------------------------------------|----------------------------------------------------------------------------------------|-------------------|-------------|
|                               |                                      |                                                                     |                                                                                                                                                                                                                          |                                                                                                                                                                                                                                                                                                                                                                                                                                              |                                | Objective                                                                                                                                                                                                                                     | Subjective                                                                             |                   |             |
|                               | semantic naming conventions          |                                                                     |                                                                                                                                                                                                                          |                                                                                                                                                                                                                                                                                                                                                                                                                                              |                                |                                                                                                                                                                                                                                               | (analysis based on labels: 6 labels×29 participants=174 data points)<br>→ strong       |                   |             |
| (Koschmider et al. 2015b)     | label: semantic naming conventions   | unrevised and revised activity labels from a linguistic perspective | unrevised versus revised activity labels: revised by students of German linguistics (e.g., using the most frequent words, considering labels in the neighborhood, replacement if synonyms are used in the process model) | <ul style="list-style-type: none"> <li>For the model that did not use domain-specific vocabulary, users rated linguistically superior labels easier to understand (based on a standard language dictionary).</li> <li>For the model with domain-specific vocabulary, the unrevised version was rated easier to understand. (It is hypothesized that a domain glossary or ontology would be better suited to revising the labels.)</li> </ul> | t-tests                        | [empirical article on subjective comprehension and user preferences]                                                                                                                                                                          | p<0.001 for all models and orders, but different directions of effect<br>→ conflicting | 49 (medium)       | 2           |
| (Mendling and Strembeck 2008) | label: semantic naming conventions   | abstract versus concrete labels                                     | manipulated factor constituting experimental groups; abstract activity labels (e.g., A, B, C) versus illustrative, textual labels (e.g., “check credit limit”)                                                           | Both groups had similar comprehension accuracy.                                                                                                                                                                                                                                                                                                                                                                                              | descriptive statistics only    | not significant<br>→ no evidence                                                                                                                                                                                                              | -                                                                                      | 42 (small)        | 6           |
| (Mendling et al. 2012b)       | label: semantic naming conventions   | abstract versus concrete labels                                     | <ul style="list-style-type: none"> <li>abstract: capital letters</li> <li>concrete: verb-object style</li> </ul>                                                                                                         | Comprehension accuracy was higher for abstract labels; time taken was lower for abstract labels.                                                                                                                                                                                                                                                                                                                                             | ANOVA                          | <ul style="list-style-type: none"> <li>comprehension accuracy: F=5.05, p=0.03</li> <li>[time taken: F=3.90, p=0.05]</li> </ul> → strong                                                                                                       | -                                                                                      | 113 (very large)  | 6           |
| (Figl and Strembeck 2015)     | label: semantic naming conventions   | abstract versus concrete labels                                     | <ul style="list-style-type: none"> <li>abstract: capital letters</li> <li>concrete: verb-object style</li> </ul>                                                                                                         | <ul style="list-style-type: none"> <li>There was no significant effect on comprehension accuracy.</li> <li>Participants took more time to answer questions on the model with concrete labels than the model with abstract labels.</li> <li>There was no significant effect on perceived ease of use of the model.</li> </ul>                                                                                                                 | ANCOVA                         | [time taken: F <sub>1,29</sub> =6.39, p=0.02]<br>→ no evidence                                                                                                                                                                                | not significant<br>→ no evidence                                                       | 44 (medium)       | 2           |
| (Mendling and Strembeck 2008) | label: label design                  | length of textual labels                                            | string length of all textual activity labels                                                                                                                                                                             | Longer text labels reduced comprehension accuracy.                                                                                                                                                                                                                                                                                                                                                                                           | correlation analysis (Pearson) | r=0.84, p=0.01<br>→ strong                                                                                                                                                                                                                    | -                                                                                      | 42 (small)        | 6           |
| <b>Model Characteristics</b>  |                                      |                                                                     |                                                                                                                                                                                                                          |                                                                                                                                                                                                                                                                                                                                                                                                                                              |                                |                                                                                                                                                                                                                                               |                                                                                        |                   |             |
| (Recker 2013)                 | model characteristics: size measures | arcs and nodes                                                      | based on arcs and nodes: <ul style="list-style-type: none"> <li>“low complexity” model (10 arcs, 7 nodes)</li> <li>“average complexity” model (17 arcs, 13 nodes)</li> </ul>                                             | <ul style="list-style-type: none"> <li>More complex models reduced comprehension accuracy.</li> <li>Significant differences were also found when comparing time taken for the pair-average-versus-high-complexity models, but not for the pair-low-versus-average-complexity model.</li> </ul>                                                                                                                                               | t-test (paired), ANCOVA        | <ul style="list-style-type: none"> <li>comprehension accuracy: F=22.76, p=0.00; t-test p&lt;0.01 for both comparisons (low/average, average/high)</li> <li>[time taken: overall test not significant; t-test p=0.01 for comparison</li> </ul> | -                                                                                      | 98 (large)        | 2*3 models  |

| Source Reference               | Category                             | Independent Variable                     | Measurement of Independent Variable                                                           | Results                                                                                                                     | Analysis Method                                                                                       | Statistical Significance and Level of Evidence of Effect on Comprehension                                        |            | # of Participants                                             | # of Models |
|--------------------------------|--------------------------------------|------------------------------------------|-----------------------------------------------------------------------------------------------|-----------------------------------------------------------------------------------------------------------------------------|-------------------------------------------------------------------------------------------------------|------------------------------------------------------------------------------------------------------------------|------------|---------------------------------------------------------------|-------------|
|                                |                                      |                                          |                                                                                               |                                                                                                                             |                                                                                                       | Objective                                                                                                        | Subjective |                                                               |             |
|                                |                                      |                                          | <ul style="list-style-type: none"> <li>“high complexity” model (61 arcs, 50 nodes)</li> </ul> |                                                                                                                             |                                                                                                       | (average/high), but not significant for comparison (low/average)]<br>→ strong                                    |            |                                                               |             |
| (Mendling and Strembeck 2008)  | model characteristics: size measures | number of nodes                          | number of nodes                                                                               | no correlation (but positive)                                                                                               | correlation analysis (Spearman)                                                                       | not significant<br>→ no evidence                                                                                 | -          | 42 (small)                                                    | 6           |
| (Sánchez-González et al. 2010) | model characteristics: size measures | number of nodes                          | number of activities and routing elements                                                     | The higher the nodes are, the lower the comprehension accuracy.                                                             | correlation and regression analysis                                                                   | r=-0.70, p=0.003<br>→ strong                                                                                     |            | 71 (large)                                                    | 15          |
| (Mendling and Strembeck 2008)  | model characteristics: size measures | diameter                                 | length of the longest path in the process model from a start node to an end node              | There was no significant correlation with comprehension accuracy (but a negative sign).                                     | correlation analysis (Spearman)                                                                       | not significant<br>→ no evidence                                                                                 | -          | 42 (small)                                                    | 6           |
| (Sánchez-González et al. 2010) | model characteristics: size measures | diameter                                 | length of the longest path in the process model from a start node to an end node              | Higher diameter led to lower comprehension accuracy.                                                                        | correlation and regression analysis                                                                   | r=-0.70, p=0.004<br>→ strong                                                                                     | -          | 71 (large)                                                    | 15          |
| (Aguilar et al., 2008)         | model characteristics: size measures | number of exclusive data-based decisions | number of exclusive data-based decisions                                                      | There was a negative correlation with time taken to answer tasks and comprehension efficiency (score/time ratio).           | correlation analysis (Spearman)                                                                       | reached significance on a 0.05 level in at least two of five sub-samples<br>→ weak                               | -          | 110 participants in 5 samples (large)                         | 10          |
| (Sánchez-González et al. 2012) | model characteristics: size measures | number of gateways                       | number of gateways                                                                            | fairly easy $\leq 9 \leq$ easy $\leq 12 \leq$ moderately difficult $\leq 16 \leq$ difficult $\leq 18 \leq$ fairly difficult | ANOVA tests (significant) between models were used to identify “thresholds” between different models. | no numbers<br>→ weak                                                                                             | -          | 28 for obtaining thresholds, 23 for cross-validation (medium) | 10          |
| (Reijers and Mendling 2011)    | model characteristics: size measures | number of OR joins                       | number of OR joins                                                                            | no significant correlation                                                                                                  | correlation analysis (Pearson)                                                                        | not significant<br>→ no evidence                                                                                 | -          | 73 (large)                                                    | 12          |
| (Aguilar et al. 2008)          | model characteristics: size measures | number of end message events             | number of end message events                                                                  | There was a correlation with comprehension efficiency (score/time ratio) (direction unclear).                               | correlation analysis (Spearman)                                                                       | reached significance on a 0.05 level in at least two of five sub-samples<br>→ weak (direction of effect unclear) | -          | 110 (large)                                                   | 10          |
| (Aguilar et al. 2008)          | model characteristics: size measures | number of events in the model            | number of events in the model                                                                 | There were negative correlations with time taken to answer tasks and comprehension efficiency (score/time ratio).           | correlation analysis (Spearman)                                                                       | reached significance on a 0.05 level in at least two of five sub-samples<br>→ weak                               | -          | 110 (large)                                                   | 10          |

| Source Reference               | Category                                         | Independent Variable                                                         | Measurement of Independent Variable                                                                                          | Results                                                                                                                                                                                                                                                                                                                                                                                                         | Analysis Method                     | Statistical Significance and Level of Evidence of Effect on Comprehension                                                                                                                                                                                                                                                                                                                       |                                                                    | # of Participants | # of Models |
|--------------------------------|--------------------------------------------------|------------------------------------------------------------------------------|------------------------------------------------------------------------------------------------------------------------------|-----------------------------------------------------------------------------------------------------------------------------------------------------------------------------------------------------------------------------------------------------------------------------------------------------------------------------------------------------------------------------------------------------------------|-------------------------------------|-------------------------------------------------------------------------------------------------------------------------------------------------------------------------------------------------------------------------------------------------------------------------------------------------------------------------------------------------------------------------------------------------|--------------------------------------------------------------------|-------------------|-------------|
|                                |                                                  |                                                                              |                                                                                                                              |                                                                                                                                                                                                                                                                                                                                                                                                                 |                                     | Objective                                                                                                                                                                                                                                                                                                                                                                                       | Subjective                                                         |                   |             |
| (Aguilar et al. 2008)          | model characteristics: size measures             | number of intermediate events in the model                                   | number of intermediate events in the model                                                                                   | There was a negative correlation with time taken to answer tasks.                                                                                                                                                                                                                                                                                                                                               | correlation analysis (Spearman)     | reached significance on a 0.05 level in at least two of five sub-samples<br>→ weak                                                                                                                                                                                                                                                                                                              | -                                                                  | 110 (large)       | 10          |
| (Aguilar et al. 2008)          | model characteristics: size measures             | number of intermediate message events                                        | number of intermediate message events                                                                                        | There were correlations with time taken to answer tasks and comprehension efficiency (score/time ratio) (direction unclear)                                                                                                                                                                                                                                                                                     | correlation analysis (Spearman)     | reached significance on a 0.05 level in at least two of five sub-samples<br>→ weak (direction of effect unclear)                                                                                                                                                                                                                                                                                | -                                                                  | 110 (large)       | 10          |
| (Aguilar et al. 2008)          | model characteristics: size measures             | number of sequence flows from events                                         | number of sequence flows from events                                                                                         | There were negative correlations with time taken to answer tasks and comprehension efficiency (score/time ratio).                                                                                                                                                                                                                                                                                               | correlation analysis (Spearman)     | reached significance on a 0.05 level in at least two of five sub-samples<br>→ weak                                                                                                                                                                                                                                                                                                              | -                                                                  | 110 (large)       | 10          |
| (Dumas et al. 2012)            | model characteristics: modularity/structuredness | structuredness                                                               | four groups of models: structuredness (structured and unstructured) × cyclicity (cyclic, acyclic)                            | <ul style="list-style-type: none"> <li>There was no overall effect, but in two models the structured version increased comprehension accuracy, and in two other models it reduced comprehension accuracy.</li> <li>There were no significant differences in the other four models; the authors hypothesized that structuring may be preferred only when it does not increase the number of gateways.</li> </ul> | ANOVA                               | <p>higher comprehension effectiveness for structured models:</p> <ul style="list-style-type: none"> <li>eff. size = 0.18, p = 0.009</li> <li>eff. size = 0.17, p = 0.011</li> </ul> <p>higher comprehension effectiveness for unstructured models:</p> <ul style="list-style-type: none"> <li>eff. size = 0.12, p = 0.0032</li> <li>eff. size = 0.14, p = 0.023</li> </ul> <p>→ conflicting</p> | -                                                                  | 55 (medium)       | 8           |
| (Mendling and Strembeck 2008)  | model characteristics: modularity/structuredness | structuredness of the process graph                                          | “one minus the number of nodes in structured blocks divided by the number of nodes”                                          | no significant effect                                                                                                                                                                                                                                                                                                                                                                                           | correlation analysis (Spearman)     | not significant<br>→ no evidence                                                                                                                                                                                                                                                                                                                                                                | -                                                                  | 42 (small)        | 6           |
| (Sánchez-González et al. 2010) | model characteristics: modularity/structuredness | maximum nesting depth                                                        | maximum nesting of structured blocks in a process model [“depth”]                                                            | higher depth negatively related to comprehension accuracy                                                                                                                                                                                                                                                                                                                                                       | correlation and regression analysis | no numbers<br>→ weak                                                                                                                                                                                                                                                                                                                                                                            | -                                                                  | 71 (large)        | 15          |
| (Figl and Laue 2011)           | model characteristics: modularity/structuredness | process structure tree (PST) distance (measured for each comprehension task) | process structure tree (PST) distance between two elements A and B = the number of arcs between A and B in the PST minus one | The higher the PST distance is, the lower the comprehension accuracy and the higher the perceived difficulty.                                                                                                                                                                                                                                                                                                   | ANCOVA                              | comprehension accuracy: ( $F_{1,55} = 4.32, p = 0.042$ )<br>→ strong                                                                                                                                                                                                                                                                                                                            | perceived difficulty ( $F_{1,55} = 22.04, p < 0.001$ )<br>→ strong | 199 (very large)  | 4           |
| (Figl and Laue 2015)           | model characteristics: modularity/structuredness | PST distance (measured for each comprehension task)                          | PST distance between two elements A and B = the number of arcs between A and B in the PST minus one                          | The higher the PST distance is, the lower the comprehension accuracy and the higher the perceived difficulty.                                                                                                                                                                                                                                                                                                   | ANCOVA                              | comprehension accuracy: ( $F_{1,53} = 22.08, p < 0.001$ )<br>→ strong                                                                                                                                                                                                                                                                                                                           | perceived difficulty ( $F_{1,53} = 17.79, p < 0.001$ )<br>→ strong | 155 (very large)  | 4           |

| Source Reference               | Category                                                    | Independent Variable                              | Measurement of Independent Variable                                                                                                                                                                       | Results                                                                                                                                                                                                                                                                                                                                                          | Analysis Method                                                      | Statistical Significance and Level of Evidence of Effect on Comprehension                                                                                                                                                                                           |                                                                      | # of Participants             | # of Models          |
|--------------------------------|-------------------------------------------------------------|---------------------------------------------------|-----------------------------------------------------------------------------------------------------------------------------------------------------------------------------------------------------------|------------------------------------------------------------------------------------------------------------------------------------------------------------------------------------------------------------------------------------------------------------------------------------------------------------------------------------------------------------------|----------------------------------------------------------------------|---------------------------------------------------------------------------------------------------------------------------------------------------------------------------------------------------------------------------------------------------------------------|----------------------------------------------------------------------|-------------------------------|----------------------|
|                                |                                                             |                                                   |                                                                                                                                                                                                           |                                                                                                                                                                                                                                                                                                                                                                  |                                                                      | Objective                                                                                                                                                                                                                                                           | Subjective                                                           |                               |                      |
| (Mendling and Strembeck 2008)  | model characteristics: modularity/structuredness            | separability                                      | relates the number of cut-vertices to the number of nodes                                                                                                                                                 | Higher separability is associated with higher comprehension accuracy.                                                                                                                                                                                                                                                                                            | correlation analysis (Spearman)                                      | $r=0.89$ , $p=0.019$ (n=6 models)<br>→ strong                                                                                                                                                                                                                       | -                                                                    | 42 (small)                    | 6                    |
| (Figl and Laue 2011)           | model characteristics: modularity/structuredness            | cut-vertex (measured for each comprehension task) | cut vertex: presence of a single arc in the BPM separates the BPM into two disjointed parts                                                                                                               | no significant effect                                                                                                                                                                                                                                                                                                                                            | ANCOVA                                                               | not significant<br>→ no evidence                                                                                                                                                                                                                                    | not significant<br>→ no evidence                                     | 199 (very large)              | 4                    |
| (Figl and Laue 2015)           | model characteristics: modularity/structuredness            | cut-vertex (measured for each comprehension task) | cut vertex: presence of a single arc in the BPM separates the BPM into two disjointed parts                                                                                                               | no significant effect                                                                                                                                                                                                                                                                                                                                            | ANCOVA                                                               | not significant<br>→ no evidence                                                                                                                                                                                                                                    | not significant<br>→ no evidence                                     | 155 (very large)              | 4                    |
| (Sánchez-González et al. 2010) | model characteristics: modularity/structuredness            | sequentiality                                     | degree to which the model is constructed out of pure sequences of task                                                                                                                                    | the higher the degree of sequentially, the higher the comprehension accuracy                                                                                                                                                                                                                                                                                     | correlation and regression analysis                                  | no numbers<br>→ weak                                                                                                                                                                                                                                                | -                                                                    | 71 (large)                    | 15                   |
| (Döhring et al. 2014)          | model characteristics: gateway interplay/control structures | simple and complex model                          | <ul style="list-style-type: none"> <li>complex: name registration for a child</li> <li>simple: travel booking</li> <li>(no further details on the kind of “complexity” are given in the paper)</li> </ul> | <ul style="list-style-type: none"> <li>There was no significant effect on task success—comprehension accuracy and modeling tasks are analyzed in combination—or easiness of tasks or task confidence.</li> <li>However, there was an effect on time taken: time taken was lower for lower-complexity models than it was for higher-complexity models.</li> </ul> | Mann-Whitney U-test, Wilcoxon rank-sum test, t-tests (paired), ANOVA | <ul style="list-style-type: none"> <li>[processing time: ANOVA: <math>F_{1,12}=29.97</math>, <math>p&lt;0.001</math>]</li> <li>task success—comprehension accuracy and modeling tasks are analyzed in combination—<br/>not significant<br/>→ no evidence</li> </ul> | easiness of tasks, task confidence: not significant<br>→ no evidence | 14 (small)                    | 2 (1 per complexity) |
| (Reijers and Mendling 2011)    | model characteristics: gateway interplay/control structures | gateway mismatch                                  | sum of gateway pairs that do not match each other                                                                                                                                                         | no significant correlation                                                                                                                                                                                                                                                                                                                                       | correlation analysis (Pearson)                                       | not significant<br>→ no evidence                                                                                                                                                                                                                                    | -                                                                    | 73 (large)                    | 12                   |
| (Sánchez-González et al. 2010) | model characteristics: gateway interplay/control structures | gateway mismatch                                  | sum of gateway pairs that do not match each other                                                                                                                                                         | The higher the gateway mismatch is, the lower comprehension accuracy.                                                                                                                                                                                                                                                                                            | correlation and regression analysis                                  | no numbers<br>→ weak                                                                                                                                                                                                                                                | -                                                                    | 71 (large)                    | 15                   |
| (Sánchez-González et al. 2012) | model characteristics: gateway                              | gateway mismatch                                  | sum of gateway pairs that do not match each other                                                                                                                                                         | easy $\leq 6 \leq$ moderately difficult $\leq 15 \leq$ difficult $\leq 20 \leq$ fairly difficult                                                                                                                                                                                                                                                                 | ANOVA tests (significant) between models                             | no numbers<br>→ weak                                                                                                                                                                                                                                                | -                                                                    | 28 for obtaining thresh-olds, | 10                   |

| Source Reference               | Category                                                    | Independent Variable             | Measurement of Independent Variable                                  | Results                                                                                                                              | Analysis Method                                                                                       | Statistical Significance and Level of Evidence of Effect on Comprehension                                                 |            | # of Participants                                              | # of Models |
|--------------------------------|-------------------------------------------------------------|----------------------------------|----------------------------------------------------------------------|--------------------------------------------------------------------------------------------------------------------------------------|-------------------------------------------------------------------------------------------------------|---------------------------------------------------------------------------------------------------------------------------|------------|----------------------------------------------------------------|-------------|
|                                |                                                             |                                  |                                                                      |                                                                                                                                      |                                                                                                       | Objective                                                                                                                 | Subjective |                                                                |             |
|                                | interplay/control structures                                |                                  |                                                                      |                                                                                                                                      | were used to identify “thresholds” between different models.                                          |                                                                                                                           |            | 23 for cross-validation (medium)                               |             |
| (Sánchez-González et al. 2012) | model characteristics: gateway interplay/control structures | control-flow complexity (CFC)    | complexity of split gateways                                         | fairly easy $\leq 13 \leq$ easy $\leq 22 \leq$ moderately difficult $\leq 37 \leq$ difficult $\leq 51 \leq$ fairly difficult         | ANOVA tests (significant) between models were used to identify “thresholds” between different models. | no numbers $\rightarrow$ weak                                                                                             | -          | 28 for obtaining thresh-olds, 23 for cross-validation (medium) | 10          |
| (Sánchez-González et al. 2010) | model characteristics: gateway interplay/control structures | gateway heterogeneity            | frequency with which different types of gateways are used in a model | Higher gateway heterogeneity lowered comprehension accuracy.                                                                         | correlation and regression analysis                                                                   | $r=-0.62$ , $p=0.014$ $\rightarrow$ strong                                                                                | -          | 71 (large)                                                     | 15          |
| (Sánchez-González et al. 2012) | model characteristics: gateway interplay/control structures | gateway heterogeneity            | frequency with which different types of gateways are used in a model | fairly easy $\leq 0.62 \leq$ easy $\leq 0.79 \leq$ moderately difficult $\leq 0.92 \leq$ difficult $\leq 0.94 \leq$ fairly difficult | ANOVA tests (significant) between models were used to identify “thresholds” between different models. | no numbers $\rightarrow$ weak                                                                                             | -          | 28 for obtaining thresh-olds, 23 for cross-validation (medium) | 10          |
| (Mendling and Strembeck 2008)  | model characteristics: gateway interplay/control structures | gateway heterogeneity            | frequency with which different types of gateways are used in a model | no significant correlation (but negative)                                                                                            | correlation analysis (Spearman)                                                                       | not significant $\rightarrow$ no evidence                                                                                 | -          | 42 (small)                                                     | 6           |
| (Reijers and Mendling 2011)    | model characteristics: gateway interplay/control structures | gateway heterogeneity            | frequency with which different types of gateways are used in a model | no significant correlation                                                                                                           | correlation analysis (Pearson)                                                                        | not significant $\rightarrow$ no evidence                                                                                 | -          | 73 (large)                                                     | 12          |
| (Aguilar et al. 2008)          | model characteristics: gateway interplay/control structures | number of looping sequence flows | number of looping sequence flows                                     | correlation with comprehension efficiency (score/time ratio); direction unclear                                                      | correlation analysis (Spearman)                                                                       | reached significance on a 0.05 level in at least two of five sub-samples $\rightarrow$ weak (direction of effect unclear) | -          | 110 participants in 5 samples (large)                          | 10          |
| (Mendling and                  | model characteristics: gateway                              | concurrency                      | sums up all concurrent threads that can be activated                 | correlation not significant (but negative)                                                                                           | correlation analysis (Spearman)                                                                       | not significant $\rightarrow$ no evidence                                                                                 | -          | 42 (small)                                                     | 6           |

| Source Reference         | Category                                                    | Independent Variable                                                          | Measurement of Independent Variable                                                                                                                                                                                     | Results                                                                                                                                                                                                                                                                                                                                                                             | Analysis Method                                                                                                                                                                              | Statistical Significance and Level of Evidence of Effect on Comprehension                                                                                                                                                                                                                |                                                                      | # of Participants                          | # of Models |
|--------------------------|-------------------------------------------------------------|-------------------------------------------------------------------------------|-------------------------------------------------------------------------------------------------------------------------------------------------------------------------------------------------------------------------|-------------------------------------------------------------------------------------------------------------------------------------------------------------------------------------------------------------------------------------------------------------------------------------------------------------------------------------------------------------------------------------|----------------------------------------------------------------------------------------------------------------------------------------------------------------------------------------------|------------------------------------------------------------------------------------------------------------------------------------------------------------------------------------------------------------------------------------------------------------------------------------------|----------------------------------------------------------------------|--------------------------------------------|-------------|
|                          |                                                             |                                                                               |                                                                                                                                                                                                                         |                                                                                                                                                                                                                                                                                                                                                                                     |                                                                                                                                                                                              | Objective                                                                                                                                                                                                                                                                                | Subjective                                                           |                                            |             |
| Strembeck 2008)          | interplay/control structures                                |                                                                               | by AND-splits and OR-splits ("token split")                                                                                                                                                                             |                                                                                                                                                                                                                                                                                                                                                                                     |                                                                                                                                                                                              |                                                                                                                                                                                                                                                                                          |                                                                      |                                            |             |
| Melcher and Seese 2008)  | model characteristics: gateway interplay/control structures | order, repetition, concurrency, exclusiveness (wording of comprehension task) | <ul style="list-style-type: none"> <li>group A: questions about order and repetition</li> <li>group B: questions about concurrency and exclusiveness</li> </ul>                                                         | Order ( $\mu=0.48$ , $SD=0.24$ ) had lower comprehension accuracy than repetition ( $\mu=0.93$ , $SD=0.10$ ), concurrency ( $\mu=0.88$ , $SD=0.23$ ), or exclusiveness ( $\mu=0.90$ , $SD=0.20$ ).                                                                                                                                                                                  | Wilcoxon rank-sum test for independent values and for paired values                                                                                                                          | $p<0.05$<br>→ strong for order versus repetition/concurrency/exclusiveness<br>→ no evidence for other comparisons                                                                                                                                                                        | -                                                                    | 18 (small)                                 | 1           |
| (Melcher et al. 2010)    | model characteristics: gateway interplay/control structures | order, repetition, concurrency, exclusiveness (wording of comprehension task) | between-subject design, each group got thirty-three (different) comprehension tasks on one aspect only (276 different questions and some dummy questions)                                                               | Order (estimated $\mu=0.58$ , $SD=0.16$ ) had lowest comprehension accuracy, repetition (estimated $\mu=0.95$ , $SD=0.15$ ) and exclusiveness (estimated $\mu=0.93$ , $SD=0.11$ ) were easiest, and concurrency (estimated $\mu=0.86$ , $SD=0.14$ ) was in the middle.<br><br>(Order was the only normal distributed variable.)                                                     | Wilcoxon-rank-sum test for independent variables ("virtual subjects procedure"; subjects with similar personal partial process comprehension accuracy are combined to a new virtual subject) | significant difference for all pair comparisons on the $\alpha=0.05$ level, with the exception of repetition and exclusiveness<br>→ moderate                                                                                                                                             | -                                                                    | 178 participants in 9 samples (very large) | 1           |
| (Figl and Laue 2011)     | model characteristics: gateway interplay/control structures | order, repetition, concurrency, exclusiveness (wording of comprehension task) | two item wordings per type of comprehension question (concurrency, exclusiveness, order, repetition) on pairs of activities, which are either close (1 activity between them) or distant ( $> 1$ activity between them) | <ul style="list-style-type: none"> <li>Order was the easiest relationship (80% correct answers) with the lowest subjective difficulty (3.08), followed by concurrency (83%, 3.20).</li> <li>Exclusiveness was the most difficult relationship concerning comprehension accuracy (70%, 3.19), and repetition was rated as the most difficult by participants (71%, 3.58).</li> </ul> | ANCOVA                                                                                                                                                                                       | comprehension accuracy: only trend ( $F_{3,55} = 2.65$ , $p = 0.058$ )<br>→ weak                                                                                                                                                                                                         | perceived difficulty ( $F_{3,55} = 4.20$ , $p = 0.010$ )<br>→ strong | 199 (very large)                           | 4           |
| (Laue and Gadatsch 2011) | model characteristics: gateway interplay/control structures | order, concurrency, exclusiveness (wording of comprehension task)             | construction of comprehension tasks (wordings of order 1 and order 2 differ)                                                                                                                                            | Comprehension accuracy (percentage of correct answers) was given, but there was no information on statistical difference between types of question.                                                                                                                                                                                                                                 | descriptive statistics only                                                                                                                                                                  | <ul style="list-style-type: none"> <li>order (style 1: 90%, style 2: 39%)</li> <li>exclusiveness (style 1: 79%, style 2: 80%)</li> <li>concurrency (style 1: 72%, style 2: 59%)</li> <li>forward dependency/response: 75%,</li> <li>backward dependency/precedence: 85%</li> </ul> →weak | -                                                                    | 22 (small)                                 | 1           |
| (Weitlaner et al. 2013)  | model characteristics: gateway interplay/control structures | order, repetition, concurrency (wording of comprehension task)                | construction of comprehension tasks (24 points per category, 72 points total)                                                                                                                                           | Comprehension accuracy was higher for order and repetition than it was for concurrency.                                                                                                                                                                                                                                                                                             | descriptive statistics only                                                                                                                                                                  | no numbers<br>→ weak                                                                                                                                                                                                                                                                     | -                                                                    | 77 (large)                                 | 4           |

| Source Reference               | Category                                                    | Independent Variable                                                                                                                               | Measurement of Independent Variable                                                                                                                             | Results                                                                                                                                                                                                                                                                                                                                                                                                                                                                                                                                                                                                                                                             | Analysis Method                                                                                       | Statistical Significance and Level of Evidence of Effect on Comprehension |                                                                              | # of Participants                                              | # of Models |
|--------------------------------|-------------------------------------------------------------|----------------------------------------------------------------------------------------------------------------------------------------------------|-----------------------------------------------------------------------------------------------------------------------------------------------------------------|---------------------------------------------------------------------------------------------------------------------------------------------------------------------------------------------------------------------------------------------------------------------------------------------------------------------------------------------------------------------------------------------------------------------------------------------------------------------------------------------------------------------------------------------------------------------------------------------------------------------------------------------------------------------|-------------------------------------------------------------------------------------------------------|---------------------------------------------------------------------------|------------------------------------------------------------------------------|----------------------------------------------------------------|-------------|
|                                |                                                             |                                                                                                                                                    |                                                                                                                                                                 |                                                                                                                                                                                                                                                                                                                                                                                                                                                                                                                                                                                                                                                                     |                                                                                                       | Objective                                                                 | Subjective                                                                   |                                                                |             |
| (Sarshar and Loos 2005)        | model characteristics: gateway interplay/control structures | questions for AND, XOR, OR, and multilevel AND/XOR situations (wording of comprehension task)                                                      | construction of comprehension tasks (details missing)                                                                                                           | <ul style="list-style-type: none"> <li>EPC multi-level AND/XOR-gateways had similar comprehension accuracy as AND-gateways and XOR-gateways.</li> <li>OR-gateways had lower comprehension accuracy than AND-gateways and XOR-gateways.</li> </ul>                                                                                                                                                                                                                                                                                                                                                                                                                   | information missing                                                                                   | no numbers<br>→weak                                                       | no numbers<br>→weak                                                          | 50 (medium)                                                    | 1           |
| (Figl and Laue 2015)           | model characteristics: gateway interplay/control structures | control-flow pattern (order/sequence, concurrency/AND, exclusiveness/XOR, repetition/loop, compound)<br><br>(measured for each comprehension task) | based on a consensus-building rating approach, the authors determined which control-flow patterns had to be considered to perform each deductive-reasoning task | <ul style="list-style-type: none"> <li>There was a significant impact of different control-flow patterns on comprehension accuracy. (Tasks were most difficult if they demanded the reader understand repetition, followed by compound control-flow patterns (a combination of at least two patterns other than order), concurrency, and exclusiveness. Tasks for which only the control-flow pattern order had to be understood had the highest comprehension accuracy.</li> <li>Trend-wise effect on subjective difficulty: Compound patterns were more difficult than order, concurrency, or exclusiveness. Repetition was more difficult than order.</li> </ul> | ANCOVA                                                                                                | comprehension accuracy ( $F_{1,53}=3.19$ , $p=0.02$ )<br>→ strong         | subjective comprehension difficulty ( $F_{1,53}=1.99$ , $p=0.11$ )<br>→ weak | 155 (very large)                                               | 4           |
| (Reijers and Mendling 2011)    | model characteristics: connection                           | average gateway degree                                                                                                                             | the average of the number of both incoming and outgoing arcs of the gateway nodes (Reijers and Mendling 2011)                                                   | The effect on comprehension accuracy was negative.                                                                                                                                                                                                                                                                                                                                                                                                                                                                                                                                                                                                                  | correlation analysis (Pearson)                                                                        | $r=-0.67$ , $p=0.02$<br>→ strong                                          | -                                                                            | 73 (large)                                                     | 12          |
| (Sánchez-González et al. 2012) | model characteristics: connection                           | average gateway degree                                                                                                                             | the average of the number of both incoming and outgoing arcs of the gateway nodes (Reijers and Mendling 2011)                                                   | fairly easy $\leq 3.67 \leq$ easy $\leq 3.83 \leq$ moderately difficult $\leq 4.06 \leq$ difficult $\leq 4.18 \leq$ fairly difficult                                                                                                                                                                                                                                                                                                                                                                                                                                                                                                                                | ANOVA tests (significant) between models were used to identify “thresholds” between different models. | no numbers<br>→ weak                                                      | -                                                                            | 28 for obtaining thresh-olds, 23 for cross-validation (medium) | 10          |
| (Sánchez-González et al. 2012) | model characteristics: connection                           | maximum gateway degree                                                                                                                             | maximum number of incoming and outgoing arcs of a decision node                                                                                                 | fairly easy $\leq 4 \leq$ easy $\leq 5 \leq$ moderately difficult $\leq 7 \leq$ difficult $\leq 9 \leq$ fairly difficult                                                                                                                                                                                                                                                                                                                                                                                                                                                                                                                                            | ANOVA tests between models were used to identify “thresholds” between different models.               | significant, but no numbers<br>→ weak                                     | -                                                                            | 28 for obtaining thresh-olds, 23 for cross-validation (medium) | 10          |
| (Reijers and Mendling 2011)    | model characteristics: connection                           | extent to which all the nodes in a model are connected to each other                                                                               | the extent to which all the nodes in a model are connected to each other (Reijers and Mendling 2011) [“cross-connectivity”]                                     | no significant correlation                                                                                                                                                                                                                                                                                                                                                                                                                                                                                                                                                                                                                                          | correlation analysis (Pearson)                                                                        | not significant<br>→ no evidence                                          | -                                                                            | 73 (large)                                                     | 12          |



| Source Reference               | Category                            | Independent Variable                                                        | Measurement of Independent Variable                                                                                                                                                            | Results                                                                                                                                                                                                                                             | Analysis Method                               | Statistical Significance and Level of Evidence of Effect on Comprehension                                                                                          |                                  | # of Participants | # of Models |
|--------------------------------|-------------------------------------|-----------------------------------------------------------------------------|------------------------------------------------------------------------------------------------------------------------------------------------------------------------------------------------|-----------------------------------------------------------------------------------------------------------------------------------------------------------------------------------------------------------------------------------------------------|-----------------------------------------------|--------------------------------------------------------------------------------------------------------------------------------------------------------------------|----------------------------------|-------------------|-------------|
|                                |                                     |                                                                             |                                                                                                                                                                                                |                                                                                                                                                                                                                                                     |                                               | Objective                                                                                                                                                          | Subjective                       |                   |             |
| (Sánchez-González et al. 2010) | model characteristics: connection   | ratio of arcs to nodes                                                      | ratio of the total number of arcs in a process model to its total number of nodes ["coefficient of connectivity"]                                                                              | A higher coefficient of connectivity is negatively related to model comprehension.                                                                                                                                                                  | correlation and regression analysis           | no numbers<br>→ weak (direction of effect unclear)                                                                                                                 | -                                | 71 (large)        | 15          |
| (Reijers and Mendling 2011)    | model characteristics: connection   | ratio of arcs to theoretically maximum number of arcs                       | "ratio of the total number of arcs in a process model to the theoretically maximum number of arcs (i.e., when all nodes are directly connected)" (Reijers and Mendling 2011, p. 5) ["density"] | Higher density is negatively related to model comprehension.                                                                                                                                                                                        | correlation analysis (Pearson)                | r=-0.62, p=0.03<br>→ strong                                                                                                                                        | -                                | 73 (large)        | 12          |
| (Mendling and Strembeck 2008)  | model characteristics: syntax rules | soundness                                                                   | soundness criteria based on (Mendling and van der Aalst 2006); for instance, soundness can be violated by the incorrect insertion of OR-joins                                                  | Correlation is not significant (but positive).                                                                                                                                                                                                      | correlation analysis (Spearman)               | not significant<br>→ no evidence                                                                                                                                   | -                                | 42 (small)        | 6           |
| (Heggset et al. 2015)          | model characteristics: syntax rules | models before and after revising syntactic quality according to a guideline | syntactic quality according to a guideline (e.g., naming conventions, allowed symbols)                                                                                                         | <ul style="list-style-type: none"> <li>no significant difference in the first model which included only a few improvements</li> <li>significant difference in the second model: higher comprehension accuracy for improved model version</li> </ul> | descriptive statistics only                   | <ul style="list-style-type: none"> <li>students: 69% (old) versus 90% (improved model)</li> <li>employees: 55% (old) versus 85% (improved model)</li> </ul> → weak | -                                | 18 (small)        | 1           |
| <b>User</b>                    |                                     |                                                                             |                                                                                                                                                                                                |                                                                                                                                                                                                                                                     |                                               |                                                                                                                                                                    |                                  |                   |             |
| (Recker and Dreiling 2007)     | user: domain knowledge              | domain knowledge                                                            | perceived knowledge of domain (no further details found)                                                                                                                                       | There was no significant effect on comprehension accuracy, perceived ease of use scale, or time taken.                                                                                                                                              | ANCOVA                                        | not significant<br>→ no evidence                                                                                                                                   | not significant<br>→ no evidence | 69 (medium)       | 2           |
| (Bera 2012)                    | user: domain knowledge              | domain knowledge                                                            | two items (experience in the last 2 years, extent of knowledge), 7-point scale                                                                                                                 | no significant effect                                                                                                                                                                                                                               | ANCOVA                                        | not significant<br>→ no evidence                                                                                                                                   | -                                | 51 (medium)       | 2           |
| (Recker et al. 2014)           | user: domain knowledge              | domain knowledge                                                            | adapted from Burton-Jones and Meso (2008), median-split groups (high-low)                                                                                                                      | no significant effect                                                                                                                                                                                                                               | ANCOVA/<br>regression analysis (hierarchical) | not significant<br>→ no evidence                                                                                                                                   | -                                | 92 (large)        | 2           |
| (Turetken et al. 2016)         | user: domain knowledge              | domain knowledge                                                            | self-rated familiarity with process and domain (26 of 60 participants were domain experts who had taken part in the execution of the process)                                                  | no significant effect                                                                                                                                                                                                                               | unknown                                       | not significant<br>→ no evidence                                                                                                                                   | not significant<br>→ no evidence | 60 (medium)       | 2           |
| (Stitzlein et al. 2013)        | user: domain knowledge              | professionals of different domains                                          | healthcare or engineering professionals                                                                                                                                                        | <ul style="list-style-type: none"> <li>There was no overall significant effect on comprehension accuracy or on complex items.</li> <li>However, for simple items, healthcare workers understood both models (BPMN, health process)</li> </ul>       | ANOVA                                         | <ul style="list-style-type: none"> <li>simple tasks: interaction effect of notation and professional background <math>F_{1,12}=6.37, p=0.03</math></li> </ul>      | -                                | 16 (small)        | 2           |

| Source Reference            | Category                                       | Independent Variable                                            | Measurement of Independent Variable                                                                                                                                   | Results                                                                                                                                                                                                                                                                                                                                                                                                                                                                               | Analysis Method                                                                      | Statistical Significance and Level of Evidence of Effect on Comprehension                                                                                                                                                                                                                                                                                                                                                                                                                                    |                                                                                                                                                                                       | # of Participants | # of Models |
|-----------------------------|------------------------------------------------|-----------------------------------------------------------------|-----------------------------------------------------------------------------------------------------------------------------------------------------------------------|---------------------------------------------------------------------------------------------------------------------------------------------------------------------------------------------------------------------------------------------------------------------------------------------------------------------------------------------------------------------------------------------------------------------------------------------------------------------------------------|--------------------------------------------------------------------------------------|--------------------------------------------------------------------------------------------------------------------------------------------------------------------------------------------------------------------------------------------------------------------------------------------------------------------------------------------------------------------------------------------------------------------------------------------------------------------------------------------------------------|---------------------------------------------------------------------------------------------------------------------------------------------------------------------------------------|-------------------|-------------|
|                             |                                                |                                                                 |                                                                                                                                                                       |                                                                                                                                                                                                                                                                                                                                                                                                                                                                                       |                                                                                      | Objective                                                                                                                                                                                                                                                                                                                                                                                                                                                                                                    | Subjective                                                                                                                                                                            |                   |             |
|                             |                                                |                                                                 |                                                                                                                                                                       | notation (HPN)) equally well, while engineers understood BPMN better than HPN.                                                                                                                                                                                                                                                                                                                                                                                                        |                                                                                      | <ul style="list-style-type: none"> <li>comprehension accuracy: overall effect not significant</li> </ul> → no evidence                                                                                                                                                                                                                                                                                                                                                                                       |                                                                                                                                                                                       |                   |             |
| (Ottensooser et al. 2012)   | user: experience and familiarity with modeling | frequency of use of flow charts                                 | 5-point scale                                                                                                                                                         | Participants who work with flowcharts more often perform better.                                                                                                                                                                                                                                                                                                                                                                                                                      | regression analysis (OLS, t-values above 1.96 are significant for a two-tailed test) | <ul style="list-style-type: none"> <li>participants at the higher end of the scale (coefficient: 0.27, standard error=0.16, t=2.31)</li> <li>participants at the lower end of the scale (coefficient: -0.09, standard error=0.14, t=-0.64)</li> </ul> → moderate                                                                                                                                                                                                                                             | -                                                                                                                                                                                     | 196 (very large)  | 6           |
| (Mendling et al. 2012b)     | user: experience and familiarity with modeling | modeling expertise                                              | how long they have been involved with the process, measured on four levels: less than one month, less than a year, less than three years, and longer than three years | <ul style="list-style-type: none"> <li>Inverse u-shaped curve: Participants with medium experience (less than three years) seem to have better comprehension accuracy than participants with low experience (less than a month) and those with high experience (longer than 3 years).</li> <li>There was no significant effect on time taken.</li> </ul>                                                                                                                              | Kruskal-Wallis test                                                                  | <ul style="list-style-type: none"> <li>comprehension accuracy: <math>X^2=24.48</math>, <math>p=0.00</math></li> </ul> → moderate                                                                                                                                                                                                                                                                                                                                                                             | -                                                                                                                                                                                     | 113 (very large)  | 6           |
| (Figl et al. 2013a)         | user: experience and familiarity with modeling | training on modeling basics                                     | training on modeling basics at a university or school (Yes/No)                                                                                                        | There was a significant influence of modeling basics training on comprehension accuracy and subjective cognitive load.                                                                                                                                                                                                                                                                                                                                                                | ANCOVA                                                                               | <ul style="list-style-type: none"> <li>small model: <math>F= 3.98</math>, <math>p= 0.05</math></li> <li>large model: <math>F=4.34</math>, <math>p= 0.04</math></li> </ul> → strong                                                                                                                                                                                                                                                                                                                           | subjective cognitive load: <ul style="list-style-type: none"> <li>small model (<math>F=4.24</math>, <math>p= 0.04</math>)</li> <li>large model: not significant</li> </ul> → moderate | 136 (very large)  | 3           |
| (Reijers and Mendling 2011) | user: experience and familiarity with modeling | educational background                                          | undergraduate versus graduate students with greater knowledge (and more hours spent on modeling) on workflow concepts (e.g., model soundness)                         | Eindhoven students had higher comprehension accuracy than students of Vienna and Madeira did.                                                                                                                                                                                                                                                                                                                                                                                         | Kruskal-Wallis test                                                                  | no numbers<br>→ moderate                                                                                                                                                                                                                                                                                                                                                                                                                                                                                     | -                                                                                                                                                                                     | 73 (large)        | 12          |
| (Recker and Dreiling 2011)  | user: experience and familiarity with modeling | modeling experience with EPC (number of models created or read) | median-split groups (high-low) based on the number of process models created or read                                                                                  | <p>Modeling experience has a positive effect on</p> <ul style="list-style-type: none"> <li>inferential transfer ability test scores (deep understanding; but not on model-based answers) and time taken (retention ability test, partial effect on claims handling task).</li> </ul> <p>There was no significant effect on:</p> <ul style="list-style-type: none"> <li>comprehension scores (retention test scores) or</li> <li>time taken (transfer ability test scores).</li> </ul> | MANCOVA                                                                              | <p>comprehension scores (retention test scores): not significant [inferential transfer ability test scores:</p> <ul style="list-style-type: none"> <li>goods receipt task: <math>F_{2,11}=3.23</math>, <math>p=0.05</math></li> <li>claims handling task: <math>F_{2,11}=3.25</math>, <math>p=0.05</math>]</li> </ul> <p>retention ability task completion times:</p> <ul style="list-style-type: none"> <li>claims handling task: <math>F_{2,11}=3.16</math>, <math>p=0.05</math>]</li> </ul> → no evidence | -                                                                                                                                                                                     | 69 (medium)       | 2           |

| Source Reference              | Category                                       | Independent Variable                                                            | Measurement of Independent Variable                                                                     | Results                                                                                                                                                                                                                                                                                                                                                                                            | Analysis Method                         | Statistical Significance and Level of Evidence of Effect on Comprehension                                                                                                                                                                                                                                                                                                                                                                                                |                                  | # of Participants | # of Models |
|-------------------------------|------------------------------------------------|---------------------------------------------------------------------------------|---------------------------------------------------------------------------------------------------------|----------------------------------------------------------------------------------------------------------------------------------------------------------------------------------------------------------------------------------------------------------------------------------------------------------------------------------------------------------------------------------------------------|-----------------------------------------|--------------------------------------------------------------------------------------------------------------------------------------------------------------------------------------------------------------------------------------------------------------------------------------------------------------------------------------------------------------------------------------------------------------------------------------------------------------------------|----------------------------------|-------------------|-------------|
|                               |                                                |                                                                                 |                                                                                                         |                                                                                                                                                                                                                                                                                                                                                                                                    |                                         | Objective                                                                                                                                                                                                                                                                                                                                                                                                                                                                | Subjective                       |                   |             |
| (Mendling and Strembeck 2008) | user: experience and familiarity with modeling | duration of involvement with business process modeling                          | four levels: less than one month, less than a year, less than three years, and longer than three years  | no significant correlation (but positive)                                                                                                                                                                                                                                                                                                                                                          | correlation analysis (Pearson)          | not significant<br>→ no evidence                                                                                                                                                                                                                                                                                                                                                                                                                                         | -                                | 42 (small)        | 6           |
| (Mendling and Strembeck 2008) | user: experience and familiarity with modeling | intensity of work with process models (how often they work with process models) | four levels: daily, monthly, less frequent than monthly, never                                          | no significant correlation (but positive)                                                                                                                                                                                                                                                                                                                                                          | correlation analysis (Pearson)          | not significant<br>→ no evidence                                                                                                                                                                                                                                                                                                                                                                                                                                         | -                                | 42 (small)        | 6           |
| (Mendling et al. 2012b)       | user: experience and familiarity with modeling | modeling intensity                                                              | how often they work with process models: four options—daily, monthly, less frequent than monthly, never | <ul style="list-style-type: none"> <li>Inverse u-shaped curve: Participants with medium modeling intensity (monthly) seem to achieve better comprehension accuracy than do participants with low modeling intensity (never, less than monthly) and those with high modeling intensity (daily).</li> <li>Users with higher modeling intensity took less time.</li> </ul>                            | Kruskal-Wallis test                     | <ul style="list-style-type: none"> <li>comprehension accuracy: not significant</li> <li>[time taken: <math>X^2=9.09</math>, <math>p=0.03</math>]<br/>→ no evidence</li> </ul>                                                                                                                                                                                                                                                                                            | -                                | 113 (very large)  | 6           |
| (Reijers and Mendling 2011)   | user: experience and familiarity with modeling | modeling experience                                                             | self-assessment of process modeling experience on a 4-point ordinal scale                               | no significant effect                                                                                                                                                                                                                                                                                                                                                                              | Kruskal-Wallis test                     | not significant<br>→ no evidence                                                                                                                                                                                                                                                                                                                                                                                                                                         | -                                | 73 (large)        | 12          |
| (Tureken et al. 2016)         | user: experience and familiarity with modeling | experience and knowledge in process modeling and BPMN                           | self-rated experience and knowledge in process modeling and BPMN                                        | no significant effect                                                                                                                                                                                                                                                                                                                                                                              | unknown                                 | not significant<br>→ no evidence                                                                                                                                                                                                                                                                                                                                                                                                                                         | not significant<br>→ no evidence | 60 (medium)       | 2           |
| (Recker and Dreiling 2011)    | user: experience and familiarity with modeling | working experience with business process modeling                               | yes/no                                                                                                  | <p>Work experience has a positive effect on:</p> <ul style="list-style-type: none"> <li>inferential transfer ability test scores</li> <li>time taken (for retention ability test)</li> </ul> <p>There was no significant effect on:</p> <ul style="list-style-type: none"> <li>comprehension scores (model-based retention test scores)</li> <li>time taken (for transfer ability test)</li> </ul> | MANCOVA                                 | <p>comprehension scores (model-based retention test scores): not significant</p> <p>[transfer ability test scores:</p> <ul style="list-style-type: none"> <li>goods receipt task: <math>F_{2,11}=3.75</math>, <math>p=0.03</math>, retention ability task completion times:</li> <li>goods receipt task: <math>F_{2,11}=6.80</math>, <math>p=0.00</math></li> <li>claims handling task: <math>F_{2,11}=8.47</math>, <math>p=0.00</math>]</li> </ul> <p>→ no evidence</p> | -                                | 69 (medium)       | 2           |
| (Recker 2013)                 | user: experience and familiarity               | self-reported familiarity of the BPMN grammar                                   | validated three-item grammar familiarity scale from (Recker 2010)                                       | no significant effect                                                                                                                                                                                                                                                                                                                                                                              | t-test (based on median-split variable) | not significant<br>→ no evidence                                                                                                                                                                                                                                                                                                                                                                                                                                         | -                                | 98 (large)        | 2*3 models  |

| Source Reference            | Category                                       | Independent Variable                                    | Measurement of Independent Variable                                                                                                                                                                              | Results                                                                                                                                             | Analysis Method                                                                      | Statistical Significance and Level of Evidence of Effect on Comprehension |                                                                                                                                                 | # of Participants | # of Models |
|-----------------------------|------------------------------------------------|---------------------------------------------------------|------------------------------------------------------------------------------------------------------------------------------------------------------------------------------------------------------------------|-----------------------------------------------------------------------------------------------------------------------------------------------------|--------------------------------------------------------------------------------------|---------------------------------------------------------------------------|-------------------------------------------------------------------------------------------------------------------------------------------------|-------------------|-------------|
|                             |                                                |                                                         |                                                                                                                                                                                                                  |                                                                                                                                                     |                                                                                      | Objective                                                                 | Subjective                                                                                                                                      |                   |             |
|                             | with modeling                                  |                                                         |                                                                                                                                                                                                                  |                                                                                                                                                     |                                                                                      |                                                                           |                                                                                                                                                 |                   |             |
| (Kummer et al. 2016)        | user: experience and familiarity with modeling | self-reported familiarity of the BPMN grammar           | validated three-item grammar familiarity scale from (Recker 2010)                                                                                                                                                | There was no significant effect on either comprehension accuracy or perceived difficulty.                                                           | MANCOVA                                                                              | no numbers → no evidence                                                  | no numbers → no evidence                                                                                                                        | 127 (very large)  | 2           |
| (Ottensooser et al. 2012)   | user: experience and familiarity with modeling | comfort with flowcharts                                 | 5-point scale for each notation                                                                                                                                                                                  | no significant effect                                                                                                                               | regression analysis (OLS, t-values above 1.96 are significant for a two-tailed test) | not significant → no evidence                                             | -                                                                                                                                               | 196 (very large)  | 6           |
| (Recker and Dreiling 2007)  | user: experience and familiarity with modeling | level of EPC competency                                 | familiarity, confidence and competence with EPC                                                                                                                                                                  | no significant effect                                                                                                                               | ANCOVA                                                                               | not significant → no evidence                                             | -                                                                                                                                               | 69 (medium)       | 2           |
| (Johannsen et al. 2014a)    | user: experience and familiarity with modeling | personal factors                                        | questions on modeling expertise, theoretical knowledge concerning modeling with process models, domain knowledge (questions were aggregated because many of the questions had no explanatory power on their own) | no significant effect                                                                                                                               | regression analysis                                                                  | not significant → no evidence                                             | -                                                                                                                                               | 51-53 (medium)    | 1           |
| (Weitlaner et al. 2013)     | user: experience and familiarity with modeling | self-assessed previous knowledge on BPM                 | participants' theoretical and practical elementary knowledge on BPM on a subjective basis, measured on a 5-point Likert scale                                                                                    | no significant correlation                                                                                                                          | correlation analysis (Pearson)                                                       | not significant → no evidence                                             | -                                                                                                                                               | 77 (large)        | 4           |
| (Reijers and Mendling 2011) | user: experience and familiarity with modeling | self-assessed theoretical knowledge on process modeling | self-assessment on a 5-point ordinal scale                                                                                                                                                                       | no significant effect                                                                                                                               | Kruskal-Wallis test                                                                  | not significant → no evidence                                             | -                                                                                                                                               | 73 (large)        | 12          |
| (Figl et al. 2013a)         | user: modeling knowledge                       | process modeling test knowledge                         | process modeling test scores (based on Mendling et al. 2012b)                                                                                                                                                    | For selected tasks prior knowledge about process modeling had significant influence on subjective cognitive load but not on comprehension accuracy. | ANCOVA                                                                               | not significant → no evidence                                             | subjective cognitive load: <ul style="list-style-type: none"> <li>large model: F=3.65, p= 0.06</li> <li>small model: not significant</li> </ul> | 136 (very large)  | 3           |

| Source Reference              | Category                 | Independent Variable                        | Measurement of Independent Variable                                                                                                                                              | Results                                                                                                                                                                                                                                  | Analysis Method                            | Statistical Significance and Level of Evidence of Effect on Comprehension                                                                                              |                                                                                                                                                                                                                 | # of Participants | # of Models |
|-------------------------------|--------------------------|---------------------------------------------|----------------------------------------------------------------------------------------------------------------------------------------------------------------------------------|------------------------------------------------------------------------------------------------------------------------------------------------------------------------------------------------------------------------------------------|--------------------------------------------|------------------------------------------------------------------------------------------------------------------------------------------------------------------------|-----------------------------------------------------------------------------------------------------------------------------------------------------------------------------------------------------------------|-------------------|-------------|
|                               |                          |                                             |                                                                                                                                                                                  |                                                                                                                                                                                                                                          |                                            | Objective                                                                                                                                                              | Subjective                                                                                                                                                                                                      |                   |             |
|                               |                          |                                             |                                                                                                                                                                                  |                                                                                                                                                                                                                                          |                                            |                                                                                                                                                                        | <ul style="list-style-type: none"> <li>text-model comparison: not significant → moderate</li> </ul>                                                                                                             |                   |             |
| (Recker et al. 2014)          | user: modeling knowledge | process modeling test knowledge             | adapted from Mendling et al. (2012b), median-split groups (high-low)                                                                                                             | no significant effect                                                                                                                                                                                                                    | ANCOVA/ regression analysis (hierarchical) | not significant → no evidence                                                                                                                                          | -                                                                                                                                                                                                               | 92 (large)        | 2           |
| (Figl et al. 2013b)           | user: modeling knowledge | process modeling test knowledge             | process modeling test scores (based on Mendling et al. 2012b)                                                                                                                    | Process modeling knowledge improves comprehension accuracy, subjective cognitive load, and subjective difficulty of control-flow comprehension.                                                                                          | regression analysis                        | $\beta=0.14, p\leq 0.001$ → strong                                                                                                                                     | <ul style="list-style-type: none"> <li>perceived cognitive load (<math>\beta=0.14, p\leq 0.001</math>)</li> <li>perceived control flow comprehension (<math>\beta=0.14, p\leq 0.001</math>)</li> </ul> → strong | 154 (very large)  | 4           |
| (Kummer et al. 2016)          | user: modeling knowledge | process modeling test knowledge             | process modeling test scores (based on Mendling et al. 2012b)                                                                                                                    | <ul style="list-style-type: none"> <li>There was a significant effect on model comprehension in the first model and a trendwise effect in the second model.</li> <li>There was no significant effect on perceived difficulty.</li> </ul> | MANCOVA                                    | <ul style="list-style-type: none"> <li>Model 1: <math>F_{1,115}=12.11, p&lt;0.001</math></li> <li>Model 2: <math>F_{1,115}=3.17, p&lt;0.1</math></li> </ul> → moderate | not significant → no evidence                                                                                                                                                                                   | 127 (very large)  | 2           |
| (Figl and Laue 2015)          | user: modeling knowledge | process modeling test knowledge (low, high) | process modeling test scores (based on Mendling et al. 2012b), median-split groups (low, high)                                                                                   | Participants with lower modeling knowledge had lower comprehension accuracy and rated tasks as more difficult than did participants with higher process-modeling knowledge.                                                              | ANCOVA                                     | $F_{1,53}=8.05, p=0.006$ → strong                                                                                                                                      | subjective difficulty ( $F_{1,53}=22.58, p<0.001$ ) → strong                                                                                                                                                    | 156 (very large)  | 4           |
| (Recker 2013)                 | user: modeling knowledge | process modeling test knowledge             | ten true/false questions on control flow logic (reachability, deadlocks, liveness, and option to complete), (based on Mendling et al. 2012b) (“knowledge of control flow logic”) | Control flow knowledge was a significant covariate for explaining comprehension accuracy but not for explaining time taken.                                                                                                              | ANCOVA (repeated measures)                 | $F=9.12, p=0.00, \eta^2=0.09$ → strong                                                                                                                                 | -                                                                                                                                                                                                               | 98 (large)        | 2*3 models  |
| (Figl and Strembeck 2015)     | user: modeling knowledge | process modeling test knowledge             | process modeling test scores (based on Mendling et al. 2012b)                                                                                                                    | There was a positive effect on comprehension accuracy, but no significant effect on either perceived ease of use or time taken                                                                                                           | ANCOVA                                     | $F_{1,36}=27.64, p<0.001$ → strong                                                                                                                                     | not significant → no evidence                                                                                                                                                                                   | 44 (medium)       | 2           |
| (Mendling and Strembeck 2008) | user: modeling knowledge | process modeling test knowledge             | six yes/no questions on questions on, for example, choices, concurrency, loops, and deadlocks; prior version of process modeling test (based on Mendling et al. 2012b)           | There was a positive relationship with comprehension accuracy.                                                                                                                                                                           | correlation analysis (Pearson)             | $r=0.49, p=0.01$ → strong                                                                                                                                              | -                                                                                                                                                                                                               | 42 (small)        | 6           |
| (Dumas et al., 2012)          | user: modeling knowledge | theoretical knowledge on process modeling   | no details found in the paper                                                                                                                                                    | There was no overall significant effect, but there was a positive effect on comprehension accuracy for four out of eight models.                                                                                                         | ANOVA                                      | effect size = 0.355-0.454, $p = 0.005-0.045$ → moderate                                                                                                                | -                                                                                                                                                                                                               | 55 (medium)       | 8           |

| Source Reference           | Category                   | Independent Variable                                        | Measurement of Independent Variable                                                                                                                                 | Results                                                                                                                                                                                                                                                                                                                                                                                                                                                                                                                           | Analysis Method                                                      | Statistical Significance and Level of Evidence of Effect on Comprehension                                                                                                                                                                                                                                                                                                                                                                                                                                                                                          |                                                                                                                                                                             | # of Participants                                      | # of Models |
|----------------------------|----------------------------|-------------------------------------------------------------|---------------------------------------------------------------------------------------------------------------------------------------------------------------------|-----------------------------------------------------------------------------------------------------------------------------------------------------------------------------------------------------------------------------------------------------------------------------------------------------------------------------------------------------------------------------------------------------------------------------------------------------------------------------------------------------------------------------------|----------------------------------------------------------------------|--------------------------------------------------------------------------------------------------------------------------------------------------------------------------------------------------------------------------------------------------------------------------------------------------------------------------------------------------------------------------------------------------------------------------------------------------------------------------------------------------------------------------------------------------------------------|-----------------------------------------------------------------------------------------------------------------------------------------------------------------------------|--------------------------------------------------------|-------------|
|                            |                            |                                                             |                                                                                                                                                                     |                                                                                                                                                                                                                                                                                                                                                                                                                                                                                                                                   |                                                                      | Objective                                                                                                                                                                                                                                                                                                                                                                                                                                                                                                                                                          | Subjective                                                                                                                                                                  |                                                        |             |
| (Figl and Recker 2016)     | user: modeling knowledge   | conceptual modeling knowledge                               | conceptual modeling test (recognizing different notations test)                                                                                                     | Knowledge on conceptual modeling heightens the preference for process model representation for comprehension tasks (more specifically, for diagrams over structured text, although there was no statistically significant effect for diagrams over text).                                                                                                                                                                                                                                                                         | multiple regression analysis                                         | [empirical article on subjective comprehension and user preferences]                                                                                                                                                                                                                                                                                                                                                                                                                                                                                               | diagrams over structured text: $B=4.86, \beta=0.21$ ( $p \leq 0.05$ )<br>diagrams over text: not significant<br>→ moderate                                                  | 120 (very large)                                       | 1           |
| (Weitlaner et al. 2013)    | user: education            | level of education                                          | three levels of education: <ul style="list-style-type: none"> <li>• apprenticeship</li> <li>• graduates/high-school</li> <li>• graduates/academics</li> </ul>       | Academics and high-school graduates performed better (higher comprehension accuracy) than apprenticeship graduates did.                                                                                                                                                                                                                                                                                                                                                                                                           | ANOVA (one-way), Tukey post-hoc tests                                | $F_{2,74}=4.47, p=0.015$ (across all processes)<br>→ strong                                                                                                                                                                                                                                                                                                                                                                                                                                                                                                        | -                                                                                                                                                                           | 77 (large)                                             | 4           |
| (Döhring et al. 2014)      | user: education            | professional level                                          | professional level: <ul style="list-style-type: none"> <li>• senior-level: post-docs and industry employees</li> <li>• student level: students up to PhD</li> </ul> | There was no significant effect on comprehension accuracy, perhaps because of a relatively coarse-granular level of measurement, nor on easiness or time taken.                                                                                                                                                                                                                                                                                                                                                                   | Mann-Whitney U-test, Wilcoxon rank-sum test, t-tests (paired), ANOVA | not significant<br>→ no evidence                                                                                                                                                                                                                                                                                                                                                                                                                                                                                                                                   | not significant<br>→ no evidence                                                                                                                                            | 14 (small)                                             | 2           |
| (Recker and Dreiling 2011) | user: user characteristics | English as a second language (ESL)                          | English as a second language (ESL): native English speakers and European and Asian English speakers                                                                 | Native speakers performed better on: <ul style="list-style-type: none"> <li>• model-based transfer ability test scores and</li> <li>• time taken (retention ability test).</li> </ul> (Interpretation: textual semantics are difficult to understand for ESL speakers.)<br><br>There was no significant effect on: <ul style="list-style-type: none"> <li>• comprehension scores (inferential transfer ability test scores, retention test scores) or</li> <li>• task completion times (transfer ability test scores).</li> </ul> | MANCOVA                                                              | comprehension scores (inferential transfer ability test scores): not significant<br><br>[model-based transfer ability test scores:<br><ul style="list-style-type: none"> <li>• goods receipt task <math>F_{2,11}=8.68, p&lt;0.001</math></li> <li>• claims handling task <math>F_{2,11}=10.74, p&lt;0.01</math></li> </ul> retention ability task completion times:<br><ul style="list-style-type: none"> <li>• goods receipt task <math>F_{2,11}=4.30, p=0.02</math></li> <li>• claims handling task <math>F_{2,11}=8.12, p=0.001</math></li> </ul> → no evidence | -                                                                                                                                                                           | 69 (21 native speakers versus 47 non-natives) (medium) | 2           |
| (Kummer et al. 2016)       | user: user characteristics | culture (Germanic – Germany and Austria; Confucian – China) | experiment was conducted in China, Germany, and Austria; country of origin                                                                                          | <ul style="list-style-type: none"> <li>• Process models were perceived to be more difficult in the Germanic culture than they are in the Confucian culture.</li> <li>• There was no difference in comprehension accuracy.</li> </ul>                                                                                                                                                                                                                                                                                              | MANCOVA                                                              | not significant<br>→ no evidence                                                                                                                                                                                                                                                                                                                                                                                                                                                                                                                                   | <ul style="list-style-type: none"> <li>• Model 1: <math>F_{1,115}=49.61, p&lt;0.001</math></li> <li>• Model 2: <math>F_{1,115}=12.44, p&lt;0.001</math></li> </ul> → strong | 127 (very large)                                       | 2           |
| (Recker et al. 2014)       | user: user characteristics | users' deep learning motive and strategy                    | revised learning process questionnaire (R-LPQ-2F) from Kember et al. (2004)                                                                                         | no significant effect                                                                                                                                                                                                                                                                                                                                                                                                                                                                                                             | regression analysis (hierarchical)                                   | not significant<br>→ no evidence                                                                                                                                                                                                                                                                                                                                                                                                                                                                                                                                   | -                                                                                                                                                                           | 92 (large)                                             | 2           |

| Source Reference       | Category                   | Independent Variable                                                  | Measurement of Independent Variable                                                             | Results                                                                                                                                                                                                                                                                                                                                                                                                                    | Analysis Method                               | Statistical Significance and Level of Evidence of Effect on Comprehension                                                                                                                                                                                                                                                                                                                                              |                                                                                                                                                                                                                                                                                                                                                                                                                                                                                                                                                                                                    | # of Participants | # of Models |
|------------------------|----------------------------|-----------------------------------------------------------------------|-------------------------------------------------------------------------------------------------|----------------------------------------------------------------------------------------------------------------------------------------------------------------------------------------------------------------------------------------------------------------------------------------------------------------------------------------------------------------------------------------------------------------------------|-----------------------------------------------|------------------------------------------------------------------------------------------------------------------------------------------------------------------------------------------------------------------------------------------------------------------------------------------------------------------------------------------------------------------------------------------------------------------------|----------------------------------------------------------------------------------------------------------------------------------------------------------------------------------------------------------------------------------------------------------------------------------------------------------------------------------------------------------------------------------------------------------------------------------------------------------------------------------------------------------------------------------------------------------------------------------------------------|-------------------|-------------|
|                        |                            |                                                                       |                                                                                                 |                                                                                                                                                                                                                                                                                                                                                                                                                            |                                               | Objective                                                                                                                                                                                                                                                                                                                                                                                                              | Subjective                                                                                                                                                                                                                                                                                                                                                                                                                                                                                                                                                                                         |                   |             |
| (Recker et al. 2014)   | user: user characteristics | users' surface learning motive and strategy                           | revised learning process questionnaire (R-LPQ-2F) from Kember et al. (2004)                     | A surface learning motive (indicating extrinsic instead of intrinsic motivation or low learning intensity) was negatively associated with comprehension accuracy, while surface learning strategy (indicating simple learning for memorization) was positively associated with comprehension accuracy.                                                                                                                     | regression analysis (hierarchical)            | surface motive: <ul style="list-style-type: none"> <li>Model 1: <math>\beta = -0.34</math>, <math>p &lt; 0.05</math></li> <li>Model 2: <math>\beta = -0.28</math>, <math>p &lt; 0.05</math></li> </ul> surface strategy: <ul style="list-style-type: none"> <li>Model 1: <math>\beta = 0.29</math>, <math>p &lt; 0.05</math></li> <li>Model 2: <math>\beta = 0.32</math>, <math>p &lt; 0.01</math></li> </ul> → strong | -                                                                                                                                                                                                                                                                                                                                                                                                                                                                                                                                                                                                  | 92 (large)        | 2           |
| (Recker et al. 2014)   | user: user characteristics | sensing versus intuitive learning style                               | sensing versus intuitive learning scale from Felder and Spurlin (2005); two median-split groups | Users with a sensing learning style achieve higher process model comprehension accuracy.                                                                                                                                                                                                                                                                                                                                   | ANCOVA                                        | no numbers<br>→ moderate                                                                                                                                                                                                                                                                                                                                                                                               | -                                                                                                                                                                                                                                                                                                                                                                                                                                                                                                                                                                                                  | 92 (large)        | 2           |
| (Recker et al. 2014)   | user: user characteristics | selection ability                                                     | “choosing a path” test (Ekstrom et al 1976)                                                     | There was a positive association with comprehension accuracy.                                                                                                                                                                                                                                                                                                                                                              | regression analysis (hierarchical)            | <ul style="list-style-type: none"> <li>Model 1: <math>\beta = -0.25</math>, <math>p &lt; 0.05</math></li> <li>Model 2: <math>\beta = -0.32</math>, <math>p &lt; 0.05</math></li> </ul> → strong                                                                                                                                                                                                                        | -                                                                                                                                                                                                                                                                                                                                                                                                                                                                                                                                                                                                  | 92 (large)        | 2           |
| (Recker et al. 2014)   | user: user characteristics | self-efficacy                                                         | adapted from Phillips and Gully (1997); median-split groups (high-low)                          | no significant effect                                                                                                                                                                                                                                                                                                                                                                                                      | ANCOVA/<br>regression analysis (hierarchical) | not significant<br>→ no evidence                                                                                                                                                                                                                                                                                                                                                                                       | -                                                                                                                                                                                                                                                                                                                                                                                                                                                                                                                                                                                                  | 92 (large)        | 2           |
| (Recker et al. 2014)   | user: user characteristics | abstraction ability                                                   | abstract reasoning: “thinking in figures” test (de Wit and Compaan 2005)                        | There was a negative association with comprehension accuracy.                                                                                                                                                                                                                                                                                                                                                              | regression analysis (hierarchical)            | <ul style="list-style-type: none"> <li>Model 1: <math>\beta = 0.56</math>, <math>p &lt; 0.001</math></li> <li>Model 2: <math>\beta = 0.61</math>, <math>p &lt; 0.001</math></li> </ul> → strong                                                                                                                                                                                                                        | -                                                                                                                                                                                                                                                                                                                                                                                                                                                                                                                                                                                                  | 92 (large)        | 2           |
| (Figl and Recker 2016) | user: user characteristics | Participants' cognitive style (verbal, spatial visual, object visual) | measured with an instrument from (Blazhenkova and Kozhevnikov 2008)                             | There were cognitive style effects on the preference for process model representation for comprehension tasks: <ul style="list-style-type: none"> <li>Spatial style heightens the preference for diagrams over text.</li> <li>Verbal style lowers the preference for diagrams over structured text and heightens the preference for structured text over text.</li> <li>Object style has no significant effect.</li> </ul> | multiple regression analysis                  | [empirical article on subjective comprehension and user preferences]                                                                                                                                                                                                                                                                                                                                                   | <ul style="list-style-type: none"> <li>Spatial style heightens the preference for diagrams over text (<math>B=7.35</math>, <math>\beta=0.27</math>, <math>p \leq 0.05</math>).</li> <li>Verbal style lowers the preference for diagrams over structured text (<math>B=-10.64</math>, <math>\beta=-0.22</math>, <math>p \leq 0.05</math>).</li> <li>Verbal style heightens the preference for structured text over text (<math>B=8.30</math>, <math>\beta=0.17</math>, <math>p \leq 0.05</math>).</li> <li>object style: not significant</li> </ul> → moderate (for spatial style and verbal style) | 120 (very large)  | 1           |

| Source Reference         | Category | Independent Variable                                                              | Measurement of Independent Variable                                                                                                                                                                                                                                                                                                                                                          | Results                                                                                                                                                                                                                                                                         | Analysis Method           | Statistical Significance and Level of Evidence of Effect on Comprehension                                                                                                                    |                                  | # of Participants | # of Models |
|--------------------------|----------|-----------------------------------------------------------------------------------|----------------------------------------------------------------------------------------------------------------------------------------------------------------------------------------------------------------------------------------------------------------------------------------------------------------------------------------------------------------------------------------------|---------------------------------------------------------------------------------------------------------------------------------------------------------------------------------------------------------------------------------------------------------------------------------|---------------------------|----------------------------------------------------------------------------------------------------------------------------------------------------------------------------------------------|----------------------------------|-------------------|-------------|
|                          |          |                                                                                   |                                                                                                                                                                                                                                                                                                                                                                                              |                                                                                                                                                                                                                                                                                 |                           | Objective                                                                                                                                                                                    | Subjective                       |                   |             |
|                          |          |                                                                                   |                                                                                                                                                                                                                                                                                                                                                                                              |                                                                                                                                                                                                                                                                                 |                           |                                                                                                                                                                                              | → no evidence (for object style) |                   |             |
| <b>Task</b>              |          |                                                                                   |                                                                                                                                                                                                                                                                                                                                                                                              |                                                                                                                                                                                                                                                                                 |                           |                                                                                                                                                                                              |                                  |                   |             |
| (Soffer et al. 2015)     | task     | provision of a catalog of routing possibilities or a catalog of workflow patterns | manipulated factor constituting experimental groups                                                                                                                                                                                                                                                                                                                                          | A catalog of routing possibilities increased comprehension accuracy for the three cases that were available only in the catalog and made no significant difference in the other two cases that were part of both catalogs, compared to the catalog of workflow pattern.         | Mann-Whitney test         | p=0.017<br>→ moderate                                                                                                                                                                        | -                                | 54 (medium)       | 5           |
| (Pichler et al. 2012)    | task     | sequential and circumstantial tasks                                               | sequential tasks (how input conditions lead to a certain outcome; e.g., "Activity X must be directly preceded by activity Y") and four circumstantial tasks (what (combination of) circumstances will cause/lead to/follow from a particular outcome: "If activity X or Y has been executed, is it possible to terminate a process instance by executing at least one additional activity?") | There was better comprehension accuracy and lower time taken for sequential than for circumstantial tasks.                                                                                                                                                                      | Sheirer-Ray-Hare test     | <ul style="list-style-type: none"> <li>comprehension accuracy: p=0.02 (for imperative models)</li> <li>[time taken: p=0.01 (both for imperative and declarative models)]</li> </ul> → strong | -                                | 27 (small)        | 4           |
| (Laue and Gadatsch 2011) | task     | question wording (style 1 and style 2 questions)                                  | manipulated factor constituting experimental groups                                                                                                                                                                                                                                                                                                                                          | exact wording of items for concurrency, exclusivity, and order influence comprehension accuracy                                                                                                                                                                                 | Pearson's Chi-Square test | level of significance 0.001<br>→ strong                                                                                                                                                      | -                                | 22 (small)        | 1           |
| (Figl and Laue 2015)     | task     | validity of conclusion (valid, wrong)                                             | manipulated factor constituting experimental groups                                                                                                                                                                                                                                                                                                                                          | <ul style="list-style-type: none"> <li>Valid reasoning tasks were more difficult to answer than invalid/wrong tasks.</li> <li>Concerning subjective difficulty, descriptive results pointed in the same unanticipated direction, although they were not significant.</li> </ul> | ANCOVA                    | comprehension accuracy<br>F <sub>1,53</sub> =7.53, p=0.008<br>→ strong                                                                                                                       | not significant<br>→ no evidence | 155 (very large)  | 4           |



## Appendix D: “Theoretical” Discussions versus Empirical Studies

**Table 6** Comparison of influence factors for process model comprehension in theoretical discussions and empirical studies

| Category of Independent Variables |                                  | Theoretical Discussions                                                                                                                                                                                                                                                                                         | Empirical Studies (measuring only subjective comprehension [s] or only preferences/perceived usefulness [p] or measuring objective comprehension [o])                                                                                                                                                                                                                                                                                                                                                                                                                                                                                                                                                                                                                      |
|-----------------------------------|----------------------------------|-----------------------------------------------------------------------------------------------------------------------------------------------------------------------------------------------------------------------------------------------------------------------------------------------------------------|----------------------------------------------------------------------------------------------------------------------------------------------------------------------------------------------------------------------------------------------------------------------------------------------------------------------------------------------------------------------------------------------------------------------------------------------------------------------------------------------------------------------------------------------------------------------------------------------------------------------------------------------------------------------------------------------------------------------------------------------------------------------------|
| <b>Presentation Medium</b>        |                                  |                                                                                                                                                                                                                                                                                                                 |                                                                                                                                                                                                                                                                                                                                                                                                                                                                                                                                                                                                                                                                                                                                                                            |
|                                   |                                  |                                                                                                                                                                                                                                                                                                                 | <ul style="list-style-type: none"> <li>paper versus online questionnaire (Mendling et al. 2012b; Recker et al. 2014) [o]</li> <li>paper versus interactive web-based visualizations (Turetken et al. 2016) [o]</li> </ul>                                                                                                                                                                                                                                                                                                                                                                                                                                                                                                                                                  |
| <b>Notation</b>                   |                                  |                                                                                                                                                                                                                                                                                                                 |                                                                                                                                                                                                                                                                                                                                                                                                                                                                                                                                                                                                                                                                                                                                                                            |
| representation paradigm           | representation and cognitive fit | <ul style="list-style-type: none"> <li>text versus model (graphical notation) (Rosa et al. 2011)</li> <li>cognitive fit (e.g., different dialects, representational media) (Genon et al. 2010)</li> </ul>                                                                                                       | <ul style="list-style-type: none"> <li>BPMN notation (graphical) versus written use cases (textual) (Ottensooser et al. 2012) [o]</li> <li>BPMN versus textual process description modeling notation (Rodrigues et al. 2015) [o]</li> <li>process model representation (text, structured text, diagram (BPMN)) (Figl and Recker 2016) [p]</li> </ul>                                                                                                                                                                                                                                                                                                                                                                                                                       |
|                                   | declarative versus imperative    | <ul style="list-style-type: none"> <li>declarative process models versus imperative process models (better comprehension of sequential information in imperative models; better comprehension of circumstantial information in declarative models) (Fahland et al. 2009)</li> </ul>                             | <ul style="list-style-type: none"> <li>declarative versus imperative models (Pichler et al. 2012) [o]</li> </ul>                                                                                                                                                                                                                                                                                                                                                                                                                                                                                                                                                                                                                                                           |
|                                   | icons                            | <ul style="list-style-type: none"> <li>assigning pictorial elements (e.g., icons, images) to modeling elements (La Rosa et al. 2011)</li> <li>domain semantic-oriented icons added to labels (Mendling and Recker 2008; Mendling et al. 2010a)</li> </ul>                                                       | <ul style="list-style-type: none"> <li>use of icons (with/without icons) (Figl and Recker 2016) [p]</li> </ul>                                                                                                                                                                                                                                                                                                                                                                                                                                                                                                                                                                                                                                                             |
|                                   | animation                        | <ul style="list-style-type: none"> <li>animation and visualization techniques for 2D and 3D models (embedding perspectives, animating control flow, animation scenarios based on event logs) (Aysolmaz and Reijers 2016)</li> <li>use of narration for process animation (Aysolmaz and Reijers 2016)</li> </ul> | <ul style="list-style-type: none"> <li>new visualizations (bubble visualization, BPMN3D, network visualization concepts, thin line concept) (Hipp et al. 2014) [s]</li> </ul>                                                                                                                                                                                                                                                                                                                                                                                                                                                                                                                                                                                              |
| primary notation                  |                                  | <ul style="list-style-type: none"> <li>BPMN, UML AD, BPMN, YAWL, EPCs, Petri nets (Figl et al. 2009)</li> <li>BPMN (Genon et al. 2010), (Leopold et al. 2016)</li> <li>routing symbol design (BPMN, UML AD, BPMN, YAWL, EPCs) (Figl et al. 2010)</li> </ul>                                                     | <ul style="list-style-type: none"> <li>C-YAWL and vBPMN (Döhring et al. 2014) [o]</li> <li>EPC versus Petrinet notation (Sarshar and Loos 2005) [o]</li> <li>configurable EPCs (C-EPCs) versus EPC (Recker et al. 2005) [p]</li> <li>EPC versus BPMN (Recker and Dreiling 2007, 2011) [o]</li> <li>UML, BPMN, EPC, SBD (storyboard design) (Weitlaner et al. 2013) [o]</li> <li>flow diagrams, eEPC, UML AD, BPMN (Sandkuhl and Wiebring 2015) [o]</li> <li>BPMN, deontic BPMN (Natschläger 2011)[o]</li> <li>BPMN, UML AD, EPC (Jošt et al. 2016) [o]</li> <li>BPMN, health process notation (HPN) (Stitzlein et al. 2013) [o]</li> <li>high communication-flow orientation versus low communication-flow orientation (Kock et al. 2008; Kock et al. 2009) [s]</li> </ul> |
| notational characteristics        | semiotic clarity                 | <ul style="list-style-type: none"> <li>semiotic clarity (Figl et al. 2009; Genon et al. 2010; Figl et al. 2010)</li> <li>avoidance of implicit splits and joins (without gateway constructs) (Leopold et al. 2016)</li> </ul>                                                                                   | <ul style="list-style-type: none"> <li>semiotic clarity deficiencies (Figl et al. 2013a) [o]</li> </ul>                                                                                                                                                                                                                                                                                                                                                                                                                                                                                                                                                                                                                                                                    |
|                                   | perceptual discriminability      | <ul style="list-style-type: none"> <li>perceptual discriminability (Figl et al. 2009; Genon et al. 2010; Figl et al. 2010)</li> </ul>                                                                                                                                                                           | <ul style="list-style-type: none"> <li>perceptual discriminability (Figl et al. 2013a; Figl et al. 2013b) [o]</li> <li>with/without BPMN gateway constructs, perceptual discriminability effect through use of gateways (Recker, 2013) [o]</li> </ul>                                                                                                                                                                                                                                                                                                                                                                                                                                                                                                                      |
|                                   | semantic transparency            | <ul style="list-style-type: none"> <li>semantic transparency (Figl et al. 2009; Genon et al. 2010; Figl et al. 2010)</li> <li>low semantic transparency of throwing message events (Leopold et al. 2016)</li> </ul>                                                                                             | <ul style="list-style-type: none"> <li>semantic transparency (Figl et al. 2013b) [o]</li> </ul>                                                                                                                                                                                                                                                                                                                                                                                                                                                                                                                                                                                                                                                                            |

| Category of Independent Variables |                                     | Theoretical Discussions                                                                                                                                                                                                                                                                                                                                                                                                                                                                                                                                                                                                                                                                                                                                                                                                                                                                                                                                                                                                                                                                                                                                                                                                                                                                                                                            | Empirical Studies (measuring only subjective comprehension [s] or only preferences/perceived usefulness [p] or measuring objective comprehension [o])                                                                                                                                                                    |
|-----------------------------------|-------------------------------------|----------------------------------------------------------------------------------------------------------------------------------------------------------------------------------------------------------------------------------------------------------------------------------------------------------------------------------------------------------------------------------------------------------------------------------------------------------------------------------------------------------------------------------------------------------------------------------------------------------------------------------------------------------------------------------------------------------------------------------------------------------------------------------------------------------------------------------------------------------------------------------------------------------------------------------------------------------------------------------------------------------------------------------------------------------------------------------------------------------------------------------------------------------------------------------------------------------------------------------------------------------------------------------------------------------------------------------------------------|--------------------------------------------------------------------------------------------------------------------------------------------------------------------------------------------------------------------------------------------------------------------------------------------------------------------------|
|                                   | visual expressiveness               | <ul style="list-style-type: none"> <li>visual expressiveness (Figl et al. 2009; Genon et al. 2010; Figl et al. 2010)</li> </ul>                                                                                                                                                                                                                                                                                                                                                                                                                                                                                                                                                                                                                                                                                                                                                                                                                                                                                                                                                                                                                                                                                                                                                                                                                    | <ul style="list-style-type: none"> <li>perceptual pop-out of symbols (Figl et al. 2013b) [o]</li> <li>symbol aesthetics (Figl et al. 2013b) [o]</li> </ul>                                                                                                                                                               |
|                                   | graphic economy                     | <ul style="list-style-type: none"> <li>restricting the syntax and semantics of a notation (creating a notation subset, e.g., for novices) (Rosa et al. 2011)</li> <li>graphic economy (Figl et al. 2009; Genon et al. 2010; Figl et al. 2010)</li> <li>extension of the syntax and semantics of a notation (e.g., to fit a domain-specific audience) (Rosa et al. 2011)</li> </ul>                                                                                                                                                                                                                                                                                                                                                                                                                                                                                                                                                                                                                                                                                                                                                                                                                                                                                                                                                                 |                                                                                                                                                                                                                                                                                                                          |
|                                   |                                     |                                                                                                                                                                                                                                                                                                                                                                                                                                                                                                                                                                                                                                                                                                                                                                                                                                                                                                                                                                                                                                                                                                                                                                                                                                                                                                                                                    | <ul style="list-style-type: none"> <li>ease of generating the models in a notation (Kock et al. 2009) [s]</li> </ul>                                                                                                                                                                                                     |
| <b>Secondary Notation</b>         |                                     |                                                                                                                                                                                                                                                                                                                                                                                                                                                                                                                                                                                                                                                                                                                                                                                                                                                                                                                                                                                                                                                                                                                                                                                                                                                                                                                                                    |                                                                                                                                                                                                                                                                                                                          |
| decomposition                     | use of decomposition/modularization | <ul style="list-style-type: none"> <li>complexity management (modularization, hierarchic structuring) (Genon et al. 2010)</li> <li>decomposition in general (Becker et al. 1995; La Rosa et al. 2011)</li> <li>decomposition/modularity (Storch et al. 2013)</li> <li>“decompose a model with more than 50 elements” (Mendling et al. 2010b, p. 131)</li> <li>“decompose a model with more than 31 nodes” (Mendling et al. 2012a, p. 1195)</li> <li>modularity (e.g., fan-in/fan-out metrics “can indicate poor modularization”) (Azim et al. 2008; Gruhn and Laue 2006b)</li> </ul>                                                                                                                                                                                                                                                                                                                                                                                                                                                                                                                                                                                                                                                                                                                                                               | <ul style="list-style-type: none"> <li>modularization (model with sub-processes, flattened model without sub-processes) (Reijers et al. 2011b; Turetken et al. 2016) [o]</li> </ul>                                                                                                                                      |
|                                   | decomposition heuristics            | <ul style="list-style-type: none"> <li>decomposition heuristics (breakpoint heuristic: decompose processes at breakpoints (e.g., sub-goals achieved, different themes); data objects heuristic: do not split activities that share objects; role heuristic (decomposition based on who is performing the activity); shared processes heuristic (redundant process fragments are modeled in one sub-process and called upon); repetition heuristic (based on frequency of process); structuredness heuristic (use single entry-single exit fragments to identify candidates for sub-processes)) (Milani et al. 2016)</li> <li>decomposition heuristics (minimality, determinism, freedom of losslessness, minimum coupling, strong cohesion violated) (Johannsen et al. 2014b)</li> <li>vertical (hierarchical, hiding in sub-processes), horizontal (partitioning in peer processes), and orthogonal (along crosscutting concerns) modularization (La Rosa et al. 2011)</li> <li>decomposition/modularity (trade-off between abstraction, which heightens comprehension, and split-attention effect, which lowers comprehension) (Zugal et al. 2012)</li> <li>constructing a consolidated model from disjointed models or merging similar process models (a family of process models) into a single process model (La Rosa et al. 2011)</li> </ul> | <ul style="list-style-type: none"> <li>decomposition: full compliance versus moderate violation (minimality, determinism, losslessness violated) versus strong violation (minimality, determinism, losslessness, minimum coupling, strong cohesion violated) (Johannsen et al. 2014a) [o]</li> </ul>                     |
| Gestalt theory                    |                                     | <ul style="list-style-type: none"> <li>change/use of a visual variable (e.g., line thickness, color) to highlight elements with a shared property (e.g. all functions in green) (La Rosa et al. 2011)</li> <li>dual coding (alignment of symbols and text) (Genon et al. 2010)</li> <li>textual annotations (in free-form text) (La Rosa et al. 2011)</li> <li>close placement of related elements (La Rosa et al. 2011)</li> <li>visual enclosure to highlight elements with a shared property (e.g., those that need revision) (La Rosa et al. 2011)</li> </ul>                                                                                                                                                                                                                                                                                                                                                                                                                                                                                                                                                                                                                                                                                                                                                                                  | <ul style="list-style-type: none"> <li>syntax highlighting with color (Reijers et al. 2011a) [o]</li> <li>color for different symbols (Kummer et al. 2016) [o]</li> <li>task-specific color highlighting (Petrusel et al. 2016) [o]</li> <li>with/without swim lanes (Bera 2012; Jeyaraj and Sauter 2014) [o]</li> </ul> |
| layout                            | edges                               | <ul style="list-style-type: none"> <li>edges (length, broken/simple/curved edges, crossing edges, placement of text on edges, ending points, angles) (Bernstein and Soffer 2015b)</li> <li>angles between edges (Bernstein and Soffer 2015a)</li> <li>control flow and message flow arcs should be consistent (Leopold et al. 2016)</li> <li>avoidance of crossing edges (La Rosa et al. 2011)</li> <li>avoidance of overlapping edges and nodes (Leopold et al. 2016)</li> <li>line crossings (Schrepfer et al. 2009)</li> </ul>                                                                                                                                                                                                                                                                                                                                                                                                                                                                                                                                                                                                                                                                                                                                                                                                                  |                                                                                                                                                                                                                                                                                                                          |
|                                   | direction                           | <ul style="list-style-type: none"> <li>flow direction (e.g., left-to-right, top-to-bottom) (La Rosa et al. 2011)</li> </ul>                                                                                                                                                                                                                                                                                                                                                                                                                                                                                                                                                                                                                                                                                                                                                                                                                                                                                                                                                                                                                                                                                                                                                                                                                        | <ul style="list-style-type: none"> <li>flow direction (Figl and Strembeck 2015) [o]</li> </ul>                                                                                                                                                                                                                           |

| Category of Independent Variables |                                   | Theoretical Discussions                                                                                                                                                                                                                                                                                                                                                                                                                                                                                                                                            | Empirical Studies (measuring only subjective comprehension [s] or only preferences/perceived usefulness [p] or measuring objective comprehension [o])                                                                                                                                                                                  |
|-----------------------------------|-----------------------------------|--------------------------------------------------------------------------------------------------------------------------------------------------------------------------------------------------------------------------------------------------------------------------------------------------------------------------------------------------------------------------------------------------------------------------------------------------------------------------------------------------------------------------------------------------------------------|----------------------------------------------------------------------------------------------------------------------------------------------------------------------------------------------------------------------------------------------------------------------------------------------------------------------------------------|
|                                   |                                   | <ul style="list-style-type: none"> <li>left-to-right orientation is superior to other flow directions (Figl and Strembeck 2014)</li> <li>model's direction (general direction, placement of ending events, branching off, change in direction) (Bernstein and Soffer 2015b)</li> <li>modeling direction (consistent left-to-right orientation) (Leopold et al. 2016)</li> </ul>                                                                                                                                                                                    |                                                                                                                                                                                                                                                                                                                                        |
|                                   | shape and size                    | <ul style="list-style-type: none"> <li>model's structure (shape "e.g., horizontally or vertically, rectangular, square" and size) (Bernstein and Soffer 2015b, 2015a)</li> <li>excessive diagram size (should fit on an A3 page) (Leopold et al. 2016)</li> </ul>                                                                                                                                                                                                                                                                                                  |                                                                                                                                                                                                                                                                                                                                        |
|                                   | symmetry                          | <ul style="list-style-type: none"> <li>symmetry in blocks (Bernstein and Soffer 2015b)</li> <li>symmetry (Schrepfer et al. 2009)</li> <li>"neat and tidy" layout instead of "chaotic and cluttered" (La Rosa et al. 2011)</li> <li>placing incoming and outgoing edges on opposite sides (La Rosa et al. 2011)</li> </ul>                                                                                                                                                                                                                                          |                                                                                                                                                                                                                                                                                                                                        |
|                                   | alignment of elements and spacing | <ul style="list-style-type: none"> <li>alignment of elements in the model (Bernstein and Soffer 2015b)</li> <li>alignment of elements to visualize their characteristics (e.g., tasks with higher frequency on the left) (Becker et al. 1995)</li> <li>inappropriate spacing (distance between connected elements should be at least 50% of the element size) (Leopold et al. 2016)</li> <li>use of locality (close placement of related elements) (Schrepfer et al. 2009)</li> <li>elements' orientation, alignment, and spacing (La Rosa et al. 2011)</li> </ul> | <ul style="list-style-type: none"> <li>task-specific layout (size of elements and alignment) (Petrusel et al. 2016) [o]</li> </ul>                                                                                                                                                                                                     |
|                                   | ending points                     | <ul style="list-style-type: none"> <li>number of ending points (Bernstein and Soffer 2015a)</li> </ul>                                                                                                                                                                                                                                                                                                                                                                                                                                                             |                                                                                                                                                                                                                                                                                                                                        |
| <b>Label</b>                      |                                   |                                                                                                                                                                                                                                                                                                                                                                                                                                                                                                                                                                    |                                                                                                                                                                                                                                                                                                                                        |
|                                   | label design                      | <ul style="list-style-type: none"> <li>label design (e.g., "lowercase usage of letters, sans-serif, non-bold fonts," optimal average length hypothesized as five to eight letters per word; constant symbol size, symbol form, and font size; left-alignment; "usage of high levels of contrast for font/background colors"; spatially close placement of labels to corresponding symbols; linguistic-based segmentation of words) (Koschmider et al. 2015a)</li> <li>label quality (label style and length) (Fettke et al. 2012)</li> </ul>                       | <ul style="list-style-type: none"> <li>string length of all textual activity labels (Mendling and Strembeck 2008) [o]</li> </ul>                                                                                                                                                                                                       |
| naming conventions                | syntactic naming conventions      | <ul style="list-style-type: none"> <li>syntactic naming conventions (e.g., use of a verb-object label style) (Fettke et al. 2012; La Rosa et al. 2011; Mendling 2013; Mendling et al. 2010a)</li> <li>inconsistent labels (violations of labeling conventions) (Overhage et al. 2012)</li> <li>naming conventions, grammatical structure (Fettke et al. 2012)</li> <li>consistent labeling (object-participle-question style for gateways, verb-object style for activities, object-participle style for events) (Leopold et al. 2016)</li> </ul>                  | <ul style="list-style-type: none"> <li>label styles (Mendling et al. 2010c) [p]</li> </ul>                                                                                                                                                                                                                                             |
|                                   | semantic naming conventions       | <ul style="list-style-type: none"> <li>semantic naming conventions (e.g., using a domain-specific vocabulary) (La Rosa et al. 2011)</li> <li>non-normalized labels (e.g., synonymous labels in one process model) (Overhage et al. 2012)</li> <li>naming conventions (consistency of terms, centralized terminology, e.g., based on glossary) (Fettke et al. 2012)</li> <li>avoidance of synonyms and homonyms (Mendling 2013)</li> <li>inconsistencies in activity label names and styles (Weber et al. 2011)</li> </ul>                                          | <ul style="list-style-type: none"> <li>abstract versus concrete labels (Mendling and Strembeck 2008) [o]; (Mendling et al. 2012b) [o]; (Figl and Strembeck 2015) [o]</li> <li>perceived ambiguity of labels (Mendling et al. 2010c) [p]</li> <li>revised labels from a linguistic perspective (Koschmider et al. 2015b) [s]</li> </ul> |
| <b>Model Characteristics</b>      |                                   |                                                                                                                                                                                                                                                                                                                                                                                                                                                                                                                                                                    |                                                                                                                                                                                                                                                                                                                                        |

| Category of Independent Variables    | Theoretical Discussions                                                                                                                                                                                                                                                                                                                                                                                                                                                                                                                                                                                                                                                                                                                                                                                                                                                                                                                                                                                                                                                                                                                                                                         | Empirical Studies (measuring only subjective comprehension [s] or only preferences/perceived usefulness [p] or measuring objective comprehension [o])                                                                                                                                                                                                                                                                                                                                                                                                                                                                                                                                                                                                                                                                      |
|--------------------------------------|-------------------------------------------------------------------------------------------------------------------------------------------------------------------------------------------------------------------------------------------------------------------------------------------------------------------------------------------------------------------------------------------------------------------------------------------------------------------------------------------------------------------------------------------------------------------------------------------------------------------------------------------------------------------------------------------------------------------------------------------------------------------------------------------------------------------------------------------------------------------------------------------------------------------------------------------------------------------------------------------------------------------------------------------------------------------------------------------------------------------------------------------------------------------------------------------------|----------------------------------------------------------------------------------------------------------------------------------------------------------------------------------------------------------------------------------------------------------------------------------------------------------------------------------------------------------------------------------------------------------------------------------------------------------------------------------------------------------------------------------------------------------------------------------------------------------------------------------------------------------------------------------------------------------------------------------------------------------------------------------------------------------------------------|
| size measures                        | <ul style="list-style-type: none"> <li>size (Becker et al. 1995; Rosa et al. 2011; Storch et al. 2013)</li> <li>“use as few elements in the model as possible” (Mendling et al. 2010b, p. 131)</li> <li>“do not use more than 31 [nodes]” (Mendling et al. 2012a, p. 1195)</li> <li>number of activities (Azim et al. 2008; Gruhn and Laue 2006b)</li> <li>omitting elements or collapsing elements into one to decrease size (Rosa et al. 2011)</li> <li>“use one start and one end event” (Mendling et al. 2010b, p. 131)</li> <li>“use no more than 2 start and end events” (Mendling et al. 2012a, p. 1195)</li> </ul>                                                                                                                                                                                                                                                                                                                                                                                                                                                                                                                                                                      | <ul style="list-style-type: none"> <li>size (based on arcs and nodes) (Recker, 2013) [o]</li> <li>diameter (Mendling and Strembeck 2008; Sánchez-González et al. 2010) [o]</li> <li>number of nodes (Sánchez-González et al. 2010) [o]</li> <li>number of events in the model (Aguilar et al. 2008) [o]</li> <li>number of end message events (Aguilar et al. 2008) [o]</li> <li>number of intermediate events in the model (Aguilar et al. 2008) [o]</li> <li>number of intermediate message events (Aguilar et al. 2008) [o]</li> <li>number of sequence flows from events (Aguilar et al. 2008) [o]</li> <li>number of exclusive data-based decisions (Aguilar et al., 2008) [o]</li> <li>number of gateways (Sánchez-González et al. 2012) [o]</li> <li>number of OR joins (Reijers and Mendling 2011) [o]</li> </ul>  |
| modularity/structuredness            | <ul style="list-style-type: none"> <li>block structuredness (corresponding split and join elements; sometimes duplication of repeating model elements is necessary to achieve this goal) (La Rosa et al. 2011; Storch et al. 2013)</li> <li>“model as structured as possible” (Mendling et al. 2010b, p. 131; Mendling et al. 2012a)</li> <li>follow patterns in which unstructured modeling enhances comprehension instead of reducing it (e.g., interruption of a sequence of activities or structured modeling would lead to deep nesting of the control flow; e.g., after a parallel execution, one task has to be repeated or structured modeling would lead to repetition of elements) (Gruhn and Laue 2007)</li> <li>model structure (e.g., nesting depth) (Azim et al. 2008)</li> <li>model structure (e.g., nesting depth, jump outs of a control structure) (Gruhn and Laue 2006b)</li> <li>nesting depth (Gruhn and Laue 2006a; Storch et al. 2013)</li> </ul>                                                                                                                                                                                                                       | <ul style="list-style-type: none"> <li>separability (Mendling and Strembeck 2008) [o]</li> <li>structuredness (Dumas et al. 2012) [o]</li> <li>structuredness of the process graph (Mendling and Strembeck 2008) [o]</li> <li>maximum nesting depth (Sánchez-González et al. 2010) [o]</li> <li>element interactivity (of the activities included in a comprehension task), measured by the PST distance (Figl and Laue 2015) [o]</li> <li>sequentiality (Sánchez-González et al. 2010) [o]</li> </ul>                                                                                                                                                                                                                                                                                                                     |
| refactoring                          | <ul style="list-style-type: none"> <li>pattern to reduce cognitive load (e.g., removing unnecessary OR gateways, e.g., as a loop entry is used for optional execution; moving redundant elements outside a control block) (Gruhn and Laue 2009)</li> <li>“unnecessarily complex control-flow structures, which could be simplified without changing the models’ behavior” (Weber et al. 2011)</li> </ul>                                                                                                                                                                                                                                                                                                                                                                                                                                                                                                                                                                                                                                                                                                                                                                                        |                                                                                                                                                                                                                                                                                                                                                                                                                                                                                                                                                                                                                                                                                                                                                                                                                            |
| redundant elements                   | <ul style="list-style-type: none"> <li>removing redundant or superfluous elements (Rosa et al. 2011)</li> <li>rules for dealing with redundancies of process tasks (Becker et al. 1995)</li> <li>redundant process fragments (Weber et al. 2011)</li> </ul>                                                                                                                                                                                                                                                                                                                                                                                                                                                                                                                                                                                                                                                                                                                                                                                                                                                                                                                                     |                                                                                                                                                                                                                                                                                                                                                                                                                                                                                                                                                                                                                                                                                                                                                                                                                            |
| gateway interplay/control structures | <ul style="list-style-type: none"> <li>cognitive weights for different control structures (Gruhn and Laue 2006a): 1(lowest): sequence, cancel activity; 2: cancel case, composite task, XOR-split with corresponding XOR-join; 3: “XOR-split (exactly one of <math>\geq 3</math> branches is chosen) with corresponding XOR-join”; 4: parallel split and synchronization; 6: multiple instances patterns; 7: multiple choice and synchronizing merge</li> <li>control flow complexity (metrics based on McCabe’s cyclomatic number, based on Halstead or on McCabe) (Azim et al. 2008)</li> <li>control flow complexity (control flow complexity (CFC) metric based on McCabe’s cyclomatic number) (Gruhn and Laue 2006b)</li> <li>“minimize the heterogeneity of gateway types” (Mendling 2013)</li> <li>“use design patterns to avoid mismatch” (Mendling 2013)</li> <li>avoid cycles (Storch et al. 2013)</li> <li>“avoid OR routing elements” (Mendling et al. 2010b, p. 131; Mendling et al. 2012a)</li> <li>“minimize the level of concurrency” (Mendling 2013)</li> <li>avoid anti-patterns (e.g., implicit termination without an explicit end state) (Gruhn and Laue 2006b)</li> </ul> | <ul style="list-style-type: none"> <li>simple and complex model (Döhring et al. 2014) [o]</li> <li>gateway heterogeneity (Mendling and Strembeck 2008; Reijers and Mendling 2011; Sánchez-González et al. 2010; Sánchez-González et al. 2012) [o]</li> <li>gateway mismatch (Reijers and Mendling 2011; Sánchez-González et al. 2010; Sánchez-González et al. 2012) [o]</li> <li>control-flow complexity (Sánchez-González et al. 2012) [o]</li> <li>number of sequence flows looping (Aguilar et al. 2008) [o]</li> <li>concurrency (Mendling and Strembeck 2008) [o]</li> <li>control flow structures (sequence versus loops versus concurrency (AND), XOR) (Figl and Laue 2011, 2015; Laue and Gadatsch 2011; Melcher et al. 2010; Melcher and Seese 2008; Sarshar and Loos 2005; Weitlaner et al. 2013) [o]</li> </ul> |

| Category of Independent Variables        | Theoretical Discussions                                                                                                                                                                                                                                                                                                                                                                                                                                                                                                                                                                                                                                                                                                                                                                                                                                                                                                                                                                                                                                                                                                                                                  | Empirical Studies (measuring only subjective comprehension [s] or only preferences/perceived usefulness [p] or measuring objective comprehension [o])                                                                                                                                                                                                                                                                                                                                                                                                                                                                                                                                                                                                                                                                                                                                                                                  |
|------------------------------------------|--------------------------------------------------------------------------------------------------------------------------------------------------------------------------------------------------------------------------------------------------------------------------------------------------------------------------------------------------------------------------------------------------------------------------------------------------------------------------------------------------------------------------------------------------------------------------------------------------------------------------------------------------------------------------------------------------------------------------------------------------------------------------------------------------------------------------------------------------------------------------------------------------------------------------------------------------------------------------------------------------------------------------------------------------------------------------------------------------------------------------------------------------------------------------|----------------------------------------------------------------------------------------------------------------------------------------------------------------------------------------------------------------------------------------------------------------------------------------------------------------------------------------------------------------------------------------------------------------------------------------------------------------------------------------------------------------------------------------------------------------------------------------------------------------------------------------------------------------------------------------------------------------------------------------------------------------------------------------------------------------------------------------------------------------------------------------------------------------------------------------|
| connection                               | <ul style="list-style-type: none"> <li>“minimize the routing paths per element” (Mendling et al. 2010b, p. 131)</li> <li>“no more than 3 inputs or outputs per gateway” (Mendling et al. 2012a, p. 1195)</li> </ul>                                                                                                                                                                                                                                                                                                                                                                                                                                                                                                                                                                                                                                                                                                                                                                                                                                                                                                                                                      | <ul style="list-style-type: none"> <li>average gateway degree (Reijers and Mendling 2011; Sánchez-González et al. 2012) [o]</li> <li>maximum gateway degree (Sánchez-González et al. 2012) [o]</li> <li>ratio of arcs to nodes (Sánchez-González et al. 2010) [o]</li> <li>ratio of arcs to theoretically maximum number of arcs (Reijers and Mendling 2011) [o]</li> <li>extent to which all the nodes in a model are connected (Reijers and Mendling 2011) [o]</li> </ul>                                                                                                                                                                                                                                                                                                                                                                                                                                                            |
| syntax rules                             | <ul style="list-style-type: none"> <li>syntactically correct use of model elements (activities, gateways, events, flow gateways; e.g., attaching message flows to incorrect nodes) and avoidance of structural inconsistencies (e.g., presence of multi-merges and deadlocks, both of which may be caused by implicit splits and joins; inconsistent connections between main process and sub-process (e.g., different roles)) (Leopold et al. 2016)</li> </ul>                                                                                                                                                                                                                                                                                                                                                                                                                                                                                                                                                                                                                                                                                                          | <ul style="list-style-type: none"> <li>models before and after revising syntactic quality according to a guideline (Heggsset et al. 2015) [o]</li> <li>soundness – can, for instance, be violated by the incorrect insertion of OR-joins (Mendling and Strembeck 2008) [o]</li> </ul>                                                                                                                                                                                                                                                                                                                                                                                                                                                                                                                                                                                                                                                  |
| <b>Task</b>                              |                                                                                                                                                                                                                                                                                                                                                                                                                                                                                                                                                                                                                                                                                                                                                                                                                                                                                                                                                                                                                                                                                                                                                                          |                                                                                                                                                                                                                                                                                                                                                                                                                                                                                                                                                                                                                                                                                                                                                                                                                                                                                                                                        |
|                                          | -                                                                                                                                                                                                                                                                                                                                                                                                                                                                                                                                                                                                                                                                                                                                                                                                                                                                                                                                                                                                                                                                                                                                                                        | <ul style="list-style-type: none"> <li>question wording of tasks (Laue and Gadatsch 2011) [o]</li> <li>validity of statements (Figl and Laue 2015) [o]</li> <li>sequential tasks (how input conditions lead to a certain outcome) versus circumstantial tasks (what combination of circumstances will lead to a particular outcome) (Pichler et al. 2012) [o]</li> <li>provision of a catalog of routing possibilities (Soffer et al. 2015) [o]</li> </ul>                                                                                                                                                                                                                                                                                                                                                                                                                                                                             |
| <b>User</b>                              |                                                                                                                                                                                                                                                                                                                                                                                                                                                                                                                                                                                                                                                                                                                                                                                                                                                                                                                                                                                                                                                                                                                                                                          |                                                                                                                                                                                                                                                                                                                                                                                                                                                                                                                                                                                                                                                                                                                                                                                                                                                                                                                                        |
| tailoring for personal factors           | <ul style="list-style-type: none"> <li>tailoring of process models for personal factors (Aysolmaz and Reijers 2016)</li> </ul>                                                                                                                                                                                                                                                                                                                                                                                                                                                                                                                                                                                                                                                                                                                                                                                                                                                                                                                                                                                                                                           |                                                                                                                                                                                                                                                                                                                                                                                                                                                                                                                                                                                                                                                                                                                                                                                                                                                                                                                                        |
| domain knowledge                         | <ul style="list-style-type: none"> <li>domain knowledge (Schrepfer et al. 2009)</li> </ul>                                                                                                                                                                                                                                                                                                                                                                                                                                                                                                                                                                                                                                                                                                                                                                                                                                                                                                                                                                                                                                                                               | <ul style="list-style-type: none"> <li>domain knowledge (Bera 2012; Turetken et al. 2016; Recker and Dreiling 2007; Recker et al. 2014) [o]</li> </ul>                                                                                                                                                                                                                                                                                                                                                                                                                                                                                                                                                                                                                                                                                                                                                                                 |
| experience and familiarity with modeling | <ul style="list-style-type: none"> <li>expert-novice differences (Genon et al. 2010)</li> <li>modeler expertise (skills, knowledge, experience) (Schrepfer et al. 2009)</li> <li>training and competence (Schrepfer et al. 2009)</li> <li>modeling language expertise and familiarity (Schrepfer et al. 2009)</li> <li>practical experience (Schrepfer et al. 2009)</li> <li>students versus practitioners (Schrepfer et al. 2009)</li> <li>time and intensity of being involved with process modeling (Schrepfer et al. 2009)</li> <li>years of work experience at process consultancy (Schrepfer et al. 2009)</li> <li>number of years of experience and deliberate practice (Schrepfer et al. 2009)</li> <li>years of field experience in process consulting (Schrepfer et al. 2009)</li> <li>estimated number of modeled processes (Schrepfer et al. 2009)</li> <li>estimated average size of modeled processes (Schrepfer et al. 2009)</li> <li>exceptional performance (training, experience, and talent) (Schrepfer et al. 2009)</li> <li>expert performance (amount and complexity of knowledge and task-specific experience) (Schrepfer et al. 2009)</li> </ul> | <ul style="list-style-type: none"> <li>duration of involvement with business process modeling (Mendling and Strembeck 2008) [o]</li> <li>self-assessment of process modeling experience (Reijers and Mendling 2011) [o]</li> <li>intensity of work with process models (Mendling and Strembeck 2008) [o]</li> <li>frequency of use of “flow charts” (Ottensooser et al. 2012) [o]</li> <li>work experience with process models (Recker and Dreiling 2011) [o]</li> <li>modeling intensity and duration of modeling involvement (Mendling et al. 2012b) [o]</li> <li>modeling familiarity (Ottensooser et al. 2012; Recker and Dreiling 2007) [o]</li> <li>training in modeling at a university (Figl et al. 2013a; Reijers and Mendling 2011) [o]</li> <li>self-assessment of previous modeling knowledge (Johannsen et al. 2014a; Turetken et al. 2016; Reijers and Mendling 2011; Weitlaner et al. 2013; Recker 2013) [o]</li> </ul> |
| modeling knowledge                       | <ul style="list-style-type: none"> <li>theoretical knowledge (Schrepfer et al. 2009)</li> </ul>                                                                                                                                                                                                                                                                                                                                                                                                                                                                                                                                                                                                                                                                                                                                                                                                                                                                                                                                                                                                                                                                          | <ul style="list-style-type: none"> <li>process-modeling knowledge test (Figl and Laue 2015; Figl et al. 2013a; Figl et al. 2013b; Figl and Strembeck 2015; Kummer et al. 2016; Mendling and Strembeck 2008; Recker 2013; Recker et al. 2014) [o]</li> <li>conceptual modeling test (Figl and Recker 2016) [p]</li> </ul>                                                                                                                                                                                                                                                                                                                                                                                                                                                                                                                                                                                                               |
| education                                | <ul style="list-style-type: none"> <li>highest educational degree (Schrepfer et al. 2009)</li> </ul>                                                                                                                                                                                                                                                                                                                                                                                                                                                                                                                                                                                                                                                                                                                                                                                                                                                                                                                                                                                                                                                                     | <ul style="list-style-type: none"> <li>higher education in general (Weitlaner et al. 2013) [o]</li> </ul>                                                                                                                                                                                                                                                                                                                                                                                                                                                                                                                                                                                                                                                                                                                                                                                                                              |
| user characteristics                     | <ul style="list-style-type: none"> <li>perceptual expertise (Schrepfer et al. 2009)</li> <li>ability to recognize patterns (Schrepfer et al. 2009)</li> </ul>                                                                                                                                                                                                                                                                                                                                                                                                                                                                                                                                                                                                                                                                                                                                                                                                                                                                                                                                                                                                            | <ul style="list-style-type: none"> <li>participants’ cognitive style (Figl and Recker 2016) [p]</li> <li>users’ surface learning motive and strategy (Recker et al. 2014) [o]</li> </ul>                                                                                                                                                                                                                                                                                                                                                                                                                                                                                                                                                                                                                                                                                                                                               |

| Category of Independent Variables | Theoretical Discussions                                                                                                                                                                                        | Empirical Studies (measuring only subjective comprehension [s] or only preferences/perceived usefulness [p] or measuring objective comprehension [o])                                |
|-----------------------------------|----------------------------------------------------------------------------------------------------------------------------------------------------------------------------------------------------------------|--------------------------------------------------------------------------------------------------------------------------------------------------------------------------------------|
|                                   | <ul style="list-style-type: none"> <li>traits, beliefs, perceived behavioral control, attitude, subjective norm, positive/negative anticipated emotion, self-efficacy, skills (Reijers et al. 2010)</li> </ul> | <ul style="list-style-type: none"> <li>sensing versus intuitive learning style (Recker et al. 2014) [o]</li> <li>native-language of labels (Recker and Dreiling 2011) [o]</li> </ul> |

**Table 7** Framework of relevant influence factors based on articles with references (condensed version of Table 6)

|                       | Influence Factors for Process Model Comprehension (Independent Variables)                                                                                                                                                                                                                         | Theoretical and Empirical Contributions                                                                                                                                                                                                                                                                                                                                                                               |
|-----------------------|---------------------------------------------------------------------------------------------------------------------------------------------------------------------------------------------------------------------------------------------------------------------------------------------------|-----------------------------------------------------------------------------------------------------------------------------------------------------------------------------------------------------------------------------------------------------------------------------------------------------------------------------------------------------------------------------------------------------------------------|
| Presentation Medium   | <u>Presentation medium</u> (paper versus computer)                                                                                                                                                                                                                                                | <b>Empirical Studies:</b> (Mendling et al. 2012b), (Recker et al. 2014), (Turetken et al. 2016)                                                                                                                                                                                                                                                                                                                       |
| Notation              | <u>Representation paradigm</u> (e.g., text versus model, differing dialects and cognitive fit, declarative versus imperative process models, assigning domain semantic-oriented pictorial elements like icons and images to modeling elements, animation, narration and visualization techniques) | <b>Theoretical Discussions:</b> (Rosa et al. 2011), (Genon et al. 2010), Fahland et al. 2009), (Mendling and Recker 2008; Mendling et al. 2010a), (Aysolmaz and Reijers 2016)<br><b>Empirical Studies:</b> (Ottenssooser et al. 2012), (Rodrigues et al. 2015), (Figl and Recker 2016), (Pichler et al. 2012), (Hipp et al. 2014), (Figl and Recker 2016)                                                             |
|                       | <u>Primary notation</u> (e.g., BPMN, UML AD, BPMN, vBPMN, YAWL, C-YAWL, EPCs, configurable EPCs, SBD)                                                                                                                                                                                             | <b>Theoretical Discussions:</b> (Figl et al. 2009), (Genon et al. 2010), (Figl et al. 2010)<br><b>Empirical Studies:</b> (Döhning et al. 2014), (Sarshar and Loos 2005), (Recker et al. 2005), (Recker and Dreiling 2007), (Recker and Dreiling 2011), (Weitlaner et al. 2013), (Sandkuhl and Wiebring 2015), (Natschläger 2011), (Jošt et al. 2016), (Stützlein et al. 2013), (Kock et al. 2009), (Kock et al. 2008) |
|                       | <u>Notational characteristics</u> (e.g., semiotic clarity, perceptual discriminability, semantic transparency, visual expressiveness, graphic economy)                                                                                                                                            | <b>Theoretical Discussions:</b> (Figl et al. 2009; Genon et al. 2010; Figl et al. 2010), (Genon et al. 2010), (Rosa et al. 2011)<br><b>Empirical Studies:</b> (Figl et al. 2013a), (Recker, 2013)                                                                                                                                                                                                                     |
| Secondary Notation    | <u>Decomposition</u> (use of decomposition/modularization, decomposition heuristics)                                                                                                                                                                                                              | <b>Theoretical Discussions:</b> (Genon et al. 2010), (Rosa et al. 2011), (Storch et al. 2013), (Mendling et al. 2010b), (Mendling et al. 2012a), (Azim et al. 2008), (Gruhn and Laue 2006b), (Milani et al. 2016), (Johannsen et al. 2014b), (La Rosa et al. 2011), (Zugal et al. 2012), (Becker et al. 1995)<br><b>Empirical Studies:</b> (Reijers et al. 2011b), (Johannsen et al. 2014a), (Turetken et al. 2016)   |
|                       | <u>Gestalt theory</u> (dual coding, highlighting, like using colors for control blocks)                                                                                                                                                                                                           | <b>Theoretical Discussions:</b> (Genon et al. 2010), (La Rosa et al. 2011)<br><b>Empirical Studies:</b> (Bera 2012), (Jeyaraj and Sauter 2014), (Reijers et al. 2011a), (Kummer et al. 2016), (Petrusel et al. 2016)                                                                                                                                                                                                  |
|                       | <u>Layout</u> (edges like crossing edges, direction, shape and size, symmetry, alignment of elements and spacing, ending points)                                                                                                                                                                  | <b>Theoretical Discussions:</b> (Bernstein and Soffer 2015a), (Bernstein and Soffer 2015b), (Leopold et al. 2016), (La Rosa et al. 2011), (Schrepfer et al. 2009), (Becker et al. 1995)<br><b>Empirical Studies:</b> (Figl and Strembeck 2015), (Petrusel et al. 2016)                                                                                                                                                |
| Label                 | <u>Label design</u>                                                                                                                                                                                                                                                                               | <b>Theoretical Discussions:</b> (Koschmider et al. 2015a), (Fettke et al. 2012)<br><b>Empirical Studies:</b> (Mendling and Strembeck 2008)                                                                                                                                                                                                                                                                            |
|                       | <u>Naming conventions</u> (syntactic like using a verb-object label style for activities, semantic like using a domain-specific vocabulary, avoidance of synonyms and homonyms)                                                                                                                   | <b>Theoretical Discussions:</b> (La Rosa et al. 2011), (Mendling et al. 2010b), (Fettke et al. 2012), (Mendling 2013), (Overhage et al. 2012), (Fettke et al. 2012), (Weber et al. 2011)<br><b>Empirical Studies:</b> (Mendling and Strembeck 2008), (Mendling et al. 2012b), (Figl and Strembeck 2015), (Mendling et al. 2010c), (Koschmider et al. 2015b)                                                           |
| Model Characteristics | <u>Size measures</u> (amount of activities, events, gateways, diameter)                                                                                                                                                                                                                           | <b>Theoretical Discussions:</b> (Rosa et al. 2011), (Storch et al. 2013), (Mendling et al. 2010b), (Mendling et al. 2012a), (Azim et al. 2008), (Gruhn and Laue 2006b), (Rosa et al. 2011), (Becker et al. 1995), (Mendling et al. 2010b), (Mendling et al. 2012a)<br><b>Empirical Studies:</b> (Recker, 2013), (Mendling and Strembeck 2008), (Sánchez-González et al. 2010), (Aguilar et al. 2008)                  |
|                       | <u>Modularity and block structuredness</u> (corresponding split and join elements) and related metrics (separability, maximum nesting depth)                                                                                                                                                      | <b>Theoretical Discussions:</b> (Rosa et al. 2011), (Storch et al. 2013), (Mendling et al. 2010b), (Mendling et al. 2012a) (Gruhn and Laue 2007), (Azim et al. 2008), (Gruhn and Laue 2006b)                                                                                                                                                                                                                          |

|      |                                                                                                                                                                                      |                                                                                                                                                                                                                                                                                                                                                                                                                                                                                                                                                                                                          |
|------|--------------------------------------------------------------------------------------------------------------------------------------------------------------------------------------|----------------------------------------------------------------------------------------------------------------------------------------------------------------------------------------------------------------------------------------------------------------------------------------------------------------------------------------------------------------------------------------------------------------------------------------------------------------------------------------------------------------------------------------------------------------------------------------------------------|
|      |                                                                                                                                                                                      | <b>Empirical Studies:</b> (Dumas et al. 2012), (Mendling and Strembeck 2008), (Sánchez-González et al. 2010), (Sánchez-González et al. 2012), (Figl and Laue 2015)                                                                                                                                                                                                                                                                                                                                                                                                                                       |
|      | <u>Refactoring</u> (simplification without changing the process's behavior)                                                                                                          | <b>Theoretical Discussions:</b> (Gruhn and Laue 2009), (Weber et al. 2011)                                                                                                                                                                                                                                                                                                                                                                                                                                                                                                                               |
|      | <u>Removing redundant elements</u>                                                                                                                                                   | <b>Theoretical Discussions:</b> (Rosa et al. 2011), (Weber et al. 2011), (Becker et al. 1995)                                                                                                                                                                                                                                                                                                                                                                                                                                                                                                            |
|      | <u>Gateway interplay/control structures</u> (XOR, cycles, OR, AND, concurrency) and related metrics (control flow complexity, sequentiality, cycles, heterogeneity of gateway types) | <b>Theoretical Discussions:</b> (Gruhn and Laue 2006a), (Azim et al. 2008), (Gruhn and Laue 2006b), (Mendling et al. 2010b), (Mendling et al. 2012a), (Storch et al. 2013), (Mendling 2013), (Reijers and Mendling 2011),<br><b>Empirical Studies:</b> (Aguilar et al. 2008), (Sánchez-González et al. 2012), (Reijers and Mendling 2011), (Döhring et al. 2014), (Sánchez-González et al. 2010), (Mendling and Strembeck 2008), (Figl and Laue 2011), (Figl and Laue 2015), (Laue and Gadatsch 2011), (Melcher et al. 2010), (Melcher and Seese 2008), (Weitlaner et al. 2013), (Sarshar and Loos 2005) |
|      | <u>Connection</u>                                                                                                                                                                    | <b>Theoretical Discussions:</b> (Mendling et al. 2010b), (Mendling et al. 2012a)<br><b>Empirical Studies:</b> (Reijers and Mendling 2011), (Sánchez-González et al. 2010), (Sánchez-González et al. 2012)                                                                                                                                                                                                                                                                                                                                                                                                |
|      | <u>Syntax rules</u>                                                                                                                                                                  | <b>Theoretical Discussions:</b> (Leopold et al. 2016)<br><b>Empirical Studies:</b> (Heggset et al. 2015), (Mendling and Strembeck 2008)                                                                                                                                                                                                                                                                                                                                                                                                                                                                  |
| Task | Task                                                                                                                                                                                 | <b>Empirical Studies:</b> (Laue and Gadatsch 2011), (Figl and Laue 2015), (Pichler et al. 2012), (Soffer et al. 2015)                                                                                                                                                                                                                                                                                                                                                                                                                                                                                    |
| User | <u>Tailoring of process models for personal factors</u>                                                                                                                              | <b>Theoretical Discussions:</b> (Aysolmaz and Reijers 2016)                                                                                                                                                                                                                                                                                                                                                                                                                                                                                                                                              |
|      | <u>Domain knowledge</u>                                                                                                                                                              | <b>Theoretical Discussions:</b> (Schrepfer et al. 2009)<br><b>Empirical Studies:</b> (Bera 2012), (Recker and Dreiling 2007), (Recker et al. 2014), (Turetken et al. 2016)                                                                                                                                                                                                                                                                                                                                                                                                                               |
|      | <u>Experience and familiarity with modeling</u>                                                                                                                                      | <b>Theoretical Discussions:</b> (Genon et al. 2010), (Schrepfer et al. 2009)<br><b>Empirical Studies:</b> (Mendling and Strembeck 2008), (Ottenssooser et al. 2012), (Recker and Dreiling 2011), (Mendling et al. 2012b), (Recker and Dreiling 2007), (Figl et al. 2013a), (Reijers and Mendling 2011), (Johannsen et al. 2014a), (Weitlaner et al. 2013), (Recker 2013), (Turetken et al. 2016)                                                                                                                                                                                                         |
|      | <u>Modeling knowledge</u>                                                                                                                                                            | <b>Theoretical Discussions:</b> (Schrepfer et al. 2009)<br><b>Empirical Studies:</b> (Figl et al. 2013a), (Figl et al. 2013b), (Figl and Laue 2015), (Figl and Strembeck 2015), (Figl and Recker 2016), (Kummer et al. 2016), (Mendling and Strembeck 2008), (Recker 2013), (Recker et al. 2014)                                                                                                                                                                                                                                                                                                         |
|      | <u>Education</u>                                                                                                                                                                     | <b>Theoretical Discussions:</b> (Schrepfer et al. 2009)<br><b>Empirical Studies:</b> (Weitlaner et al. 2013)                                                                                                                                                                                                                                                                                                                                                                                                                                                                                             |
|      | <u>User characteristics</u>                                                                                                                                                          | <b>Theoretical Discussions:</b> (Schrepfer et al. 2009), (Reijers et al. 2010)<br><b>Empirical Studies:</b> (Figl and Recker 2016), (Recker et al. 2014), (Recker and Dreiling 2011)                                                                                                                                                                                                                                                                                                                                                                                                                     |

## References

- Aguilar ER, García F, Ruiz F, Piattini M, Visaggio CA, Canfora G (2008) Evaluation of BPMN models quality-a family of experiments. In: 3rd International conference on evaluation of novel approaches to software engineering, Funchal, pp 56–63
- Aysolmaz B, Reijers HA (2016) Towards an integrated framework for invigorating process models: a research agenda. In: Reichert M, Reijers HA (eds) Business process management workshops 2015, LNBP 256, Innsbruck, Austria. Springer International Publishing, pp 552–558. doi:10.1007/978-3-319-42887-1\_44
- Azim A, Ghani A, Koh Tieng WG, Muketha M, Wen WP (2008) Complexity metrics for measuring the understandability and maintainability of business process models using goal-question-metric. *Int J Comput Sci Netw Secur* 8(5):219–225
- Becker J, Rosemann M, Schütte R (1995) Grundsätze ordnungsmäßiger Modellierung. *WIRTSCHAFTSINFORMATIK* 37(5):435–445
- Bera P (2012) Does cognitive overload matter in understanding BPMN models? *J Comput Inf Syst* 52(4):59–69
- Bernstein V, Soffer P (2015a) How does it look? exploring meaningful layout features of process models. In: Advanced Information Systems Engineering Workshops. Springer, Heidelberg, pp 81–86
- Bernstein V, Soffer P (2015b) Identifying and quantifying visual layout features of business process models. In: Enterprise, business-process and information systems modeling. Springer, Heidelberg, pp 200–213
- Blazhenkova O, Kozhevnikov M (2008) The new object-spatial-verbal cognitive style model: theory and measurement. *Appl Cognit Psychol* 23(5):638–663. doi:10.1002/acp.1473
- Burton-Jones A, Meso P (2008) The effects of decomposition quality and multiple forms of information on novices understanding of a domain from a conceptual model. *J Assoc Inf Syst* 9(12):784–802
- Döhring M, Reijers HA, Smirnov S (2014) Configuration vs. adaptation for business process variant maintenance: an empirical study. *Inf Syst* 39:108–133. doi:10.1016/j.is.2013.06.002
- Dumas M, La Rosa M, Mendling J, Mäesalu R, Reijers H, Semenenko N (2012) Understanding business process models: the costs and benefits of structuredness. In: Ralyté J, Franch X, Brinkkemper S, Wrycza S (eds) Advanced information systems engineering, LNCS, vol 7328. Springer, Heidelberg, pp 31–46. doi:10.1007/978-3-642-31095-9\_3
- Fahland D, Lübke D, Mendling J, Reijers HA, Weber B, Weidlich M, Zugal S (2009) Declarative versus imperative process modeling languages: the issue of understandability. In: Halpin T, Krogstie J, Nurcan S et al (eds) Enterprise, business-process and information systems modeling. Proceedings of the 10th international workshop BPMDS 2009 and 14th international conference EMMSAD, pp 353–366
- Felder RM, Spurlin J (2005) Applications, reliability and validity of the index of learning styles. *Int J Eng Educ* 21(1):103–112
- Fettke P, Vella AL, Loos P (2012) From measuring the quality of labels in process models to a discourse on process model quality: a case study. In: 45th Hawaii international conference on system sciences (HICSS), pp 197–206. doi:10.1109/HICSS.2012.290
- Figl K, Laue R (2011) Cognitive complexity in business process modeling. In: Mouratidis H, Rolland C (eds) Advanced information systems engineering, LNCS, vol 6741. Springer, Heidelberg, pp 452–466. doi:10.1007/978-3-642-21640-4\_34
- Figl K, Laue R (2015) Influence factors for local comprehensibility of process models. *Int J Hum Comput Stud* 82:96–110. doi:10.1016/j.ijhcs.2015.05.007
- Figl K, Mendling J, Strembeck M (2009) Towards a usability assessment of process modeling languages. In: 8th GI-Workshop Geschäftsprozessmanagement mit Ereignisgesteuerten Prozessketten (EPK), CEUR-WS, vol 554. Berlin, pp 138–156
- Figl K, Mendling J, Strembeck M (2013a) The influence of notational deficiencies on process model comprehension. *J Assoc Inf Syst* 14(6):312–338
- Figl K, Mendling J, Strembeck M, Recker J (2010) On the cognitive effectiveness of routing symbols in process modeling languages. In: 13th international conference on business information systems (BIS), Berlin
- Figl K, Recker J (2016) Exploring cognitive style and task-specific preferences for process representations. *Requir Eng* 21(1):63–85. doi:10.1007/s00766-014-0210-2
- Figl K, Recker J, Mendling J (2013b) A study on the effects of routing symbol design on process model comprehension. *Decis Support Syst* 54(2):1104–1118. doi:10.1016/j.dss.2012.10.037
- Figl K, Strembeck M (2014) On the importance of flow direction in business process models. In: 9th International conference on software engineering and applications (ICSOFT-EA). SCITEPRESS, Vienna



- Figl K, Strembeck M (2015) Findings from an experiment on flow direction of business process models. In: International workshop on enterprise modelling and information systems architectures (EMISA), Innsbruck
- Genon N, Heymans P, Amyot D (2010) Analysing the cognitive effectiveness of the BPMN 2.0 visual syntax. In: Software language engineering, LNCS. Springer, Heidelberg, pp 377–396
- Gruhn V, Laue R (2006) Adopting the cognitive complexity measure for business process models. In: 5th IEEE International conference on cognitive informatics, pp 236–241. doi:10.1109/COGINF.2006.365702
- Gruhn V, Laue R (2006b) Complexity metrics for business process Models. In: 9th International conference on business information. Springer, Heidelberg, pp 1-12
- Gruhn V, Laue R (2007) Good and bad excuses for unstructured business process models. In: 12th European conference on pattern languages of programs (EuroPLoP)
- Gruhn V, Laue R (2009) Reducing the cognitive complexity of business process models. In: 8th IEEE International conference on cognitive informatics (ICCI'09), pp 339-345
- Heggset M, Krogstie J, Wesenberg H (2015) The influence of syntactic quality of enterprise process models on model comprehension. CAiSE forum. CEUR, Stockholm
- Hipp M, Strauss A, Michelberger B, Mutschler B, Reichert M (2014) Enabling a user-friendly visualization of business process models. Business process management workshops, LNBIP. Springer, Heidelberg, pp 395–407
- Jeyaraj A, Sauter VL (2014) Validation of business process models using swimlane diagrams. *J Inf Technol Manag* 25(4):27
- Johannsen F, Leist S, Braunnagel D (2014) Testing the impact of wand and weber's decomposition model on process model understandability. In: International conference on information systems, Auckland
- Johannsen F, Leist S, Tausch R (2014b) Wand and Weber's good decomposition conditions for BPMN. *Bus Process Manag J* 20(5):693
- Jošt G, Huber J, Heričko M, Polančič G (2016) An empirical investigation of intuitive understandability of process diagrams. *Comput Stand Interfac* 48:90–111. doi:10.1016/j.csi.2016.04.006
- Kember D, Biggs J, Leung DY (2004) Examining the multidimensionality of approaches to learning through the development of a revised version of the Learning Process Questionnaire. *Br J Educ Psychol* 74(2):261-279
- Kock N, Danesh A, Komiak P (2008) A discussion and test of a communication flow optimization approach for business process redesign. *Knowl Process Manag* 15(1):72
- Kock N, Verville J, Danesh-pajou A, Deluca D (2009) Communication flow orientation in business process modeling and its effect on redesign success: results from a field study. *Decis Support Syst* 46(2):562–575. doi:10.1016/j.dss.2008.10.002
- Koschmider A, Figl K, Schoknecht A (2015a) A comprehensive overview of visual design of process model element labels. In: Business process management workshops, Innsbruck
- Koschmider A, Ullrich M, Heine A, Oberweis A (2015b) Revising the vocabulary of business process element labels. In: Zdravkovic J, Kirikova M, Johannesson P (eds) *Advanced information systems engineering*, LNCS, vol 9097. Springer, Heidelberg, pp 69–83. doi:10.1007/978-3-319-19069-3\_5
- Kummer T-F, Recker J, Mendling J (2016) Enhancing understandability of process models through cultural-dependent color adjustments. *Decis Support Syst* 87:1–12. doi:10.1016/j.dss.2016.04.004
- La Rosa M, ter Hofstede AHM, Wohed P, Reijers HA, Mendling J, van der Aalst WMP (2011) Managing process model complexity via concrete syntax modifications. *IEEE Trans Ind Inform* 7(2):255–265
- Laue R, Gadatsch A (2011) Measuring the understandability of business process models—are we asking the right questions? In: Business process management workshops, LNBIP, vol 66. Springer, Heidelberg, pp 37–48
- Leopold H, Mendling J, Günther O (2016) Learning from quality issues of BPMN models from industry. *IEEE Softw* 33(4):26–33. doi:10.1109/MS.2015.81
- Maes A, Poels G (2007) Evaluating quality of conceptual modelling scripts based on user perceptions. *Data & Knowledge Engineering* 63(3):701-724
- Melcher J, Seese D (2008) Towards validating prediction systems for process understandability: measuring process understandability. In: 10th International symposium on symbolic and numeric algorithms for scientific computing (SYNASC'08), pp 564–571

- Melcher J, Mendling J, Reijers HA, Seese D (2010) On measuring the understandability of process models. In: Business process management workshops, LNBIP, vol 43. Springer, Heidelberg, pp 465–476
- Mendling J (2013) Managing structural and textual quality of business process models. Data-driven process discovery and analysis. Springer, Heidelberg, pp 100–111
- Mendling J, Recker J (2008) Towards systematic usage of labels and icons in business process models. In: Halpin T, Proper HA, Krogstie J (eds) 12th International workshop on exploring modeling methods in systems analysis and design, pp 1-13
- Mendling J, Recker J, Reijers HA (2010a) On the usage of labels and icons in business process modeling. *Int J Inf Syst Model Des* 1(2):40-58
- Mendling J, Reijers H, van der Aalst WMP (2010b) Seven process modeling guidelines (7PMG). *Inf Softw Technol* 52(2):127–136
- Mendling J, Reijers HA, Cardoso J (2007) What makes process models understandable. In: International conference on business process management, LNCS, Springer, Heidelberg, pp 48-63
- Mendling J, Reijers HA, Recker J (2010c) Activity labeling in process modeling: empirical insights and recommendations. *Inf Syst* 35(4):467–482
- Mendling J, Sánchez-González L, García F, La Rosa M (2012a) Thresholds for error probability measures of business process models. *J Syst Softw* 85(5):1188–1197. doi:10.1016/j.jss.2012.01.017
- Mendling J, Strembeck M (2008) Influence factors of understanding business process models. In: Abramowicz W, Fensel D (eds) Business information systems (BIS), vol 7. Springer, Heidelberg, pp 142–153
- Mendling J, Strembeck M, Recker J (2012b) Factors of process model comprehension—findings from a series of experiments. *Decis Support Syst* 53(1):195–206
- Mendling J, van der Aalst WM (2006) Towards EPC semantics based on state and context. In: 5th GI-Workshop Geschäftsprozessmanagement mit Ereignisgesteuerten Prozessketten (EPK), pp 25-48
- Milani F, Dumas M, Matulevičius R, Ahmed N, Kasela S (2016) Criteria and heuristics for business process model decomposition. *Bus Inf Syst Eng* 58(1):7–17
- Natschläger C (2011) Deontic BPMN. In: Hameurlain A, Liddle S, Schewe K-D, Zhou X (eds) Database and expert systems applications, LNCS, vol 6861. Springer, Heidelberg, pp 264–278. doi:10.1007/978-3-642-23091-2\_23
- Ottensooser A, Fekete A, Reijers HA, Mendling J, Menictas C (2012) Making sense of business process descriptions: an experimental comparison of graphical and textual notations. *J Syst Softw* 85(3):596–606
- Overhage S, Birkmeier DQ, Schlauderer S (2012) Quality marks, metrics, and measurement procedures for business process models. *Bus Inf Syst Eng* 54(5):217–235. doi:10.1007/s11576-012-0335-1
- Petrusel R, Mendling J, Reijers HA (2016) Task-specific visual cues for improving process model understanding. *Inf Softw Technol* 79:63–78
- Pichler P, Weber B, Zugal S, Pinggera J, Mendling J, Reijers HA (2012) Imperative versus declarative process modeling languages: an empirical investigation. In: Business process management workshops, LNBIP, vol 99, pp 383–394
- Recker J (2010) Continued use of process modeling grammars: the impact of individual difference factors. *Europ J Inf Syst* 19(1):76-92
- Recker J (2013) Empirical investigation of the usefulness of gateway constructs in process models. *Eur J Inf Syst* 22(6):673–689
- Recker J, Dreiling A (2007) Does it matter which process modelling language we teach or use? An experimental study on understanding process modelling languages without formal education. In: Toleman M, Cater-Steel A, Roberts D (eds) Australasian conference on information systems. The University of Southern Queensland, pp 356–366
- Recker J, Dreiling A (2011) The effects of content presentation format and user characteristics on novice developers' understanding of process models. *Commun Assoc Inf Syst* 28 (1), Article 6, pp. 65-84
- Recker J, Reijers HA, van de Wouw SG (2014) Process model comprehension: the effects of cognitive abilities, learning style and strategy. *Commun Assoc Inf Syst* 34(9):199–222
- Recker J, Rosemann M, van der Aalst WMP (2005) On the user perception of configurable reference process models—initial insights. In: 16th Australasian Conference on Information Systems, Paper 66
- Reijers HA, Freytag T, Mendling J, Eckleder A (2011a) Syntax highlighting in business process models. *Decis Support Syst* 51:339–349

- Reijers HA, Mendling J (2011) A study into the factors that influence the understandability of business process models. *IEEE Trans Sys Man Cybern Part A* 41(3):449–462
- Reijers HA, Mendling J, Dijkman RM (2011b) Human and automatic modularizations of process models to enhance their comprehension. *Inf Syst* 36(5):881–897
- Reijers HA, Recker JC, van de Wouw SG (2010) An integrative framework of the factors affecting process model understanding: a learning perspective. In: 16th Americas conference on information systems: sustainable IT collaboration around the globe. Association for Information Systems, Paper 184
- Rodrigues RDA, Barros MDO, Revoredo K, Azevedo LG, Leopold H (2015) An experiment on process model understandability using textual work instructions and BPMN models. In: 29th Brazilian symposium on software engineering (SBES), pp 41–50. doi:10.1109/SBES.2015.12
- Rosa ML, Wohed P, Mendling J, ter Hofstede AHM, Reijers HA, van der Aalst WMP (2011) Managing process model complexity via abstract syntax modifications. *IEEE Trans Ind Inform* 7(4):614–629. doi:10.1109/TII.2011.2166795
- Sánchez-González L, García F, Mendling J, Ruiz F (2010) Quality assessment of business process models based on thresholds. In: Meersman R, Dillon T, Herrero P (eds) *On the move to meaningful internet systems: OTM 2010, LNCS*, vol 6426. Springer, Heidelberg, pp 78–95. doi:10.1007/978-3-642-16934-2\_9
- Sánchez-González L, García F, Ruiz F, Mendling J (2012) Quality indicators for business process models from a gateway complexity perspective. *Inf Softw Technol* 54(11):1159–1174. doi:10.1016/j.infsof.2012.05.001
- Sandkuhl K, Wiebring J (2015) Experiences from selecting a BPM notation for an enterprise. *Business information systems workshops*. Springer, Heidelberg, pp 126–138
- Sarshar K, Loos P (2005) Comparing the control-flow of epc and petri net from the end-user perspective. In: *International conference on business process management*. Springer, Heidelberg, pp 434–439
- Schrepfer M, Wolf J, Mendling J, Reijers HA (2009) The impact of secondary notation on process model understanding. In: *The practice of enterprise modeling, 2nd IFIP WG8.1 working conference (PoEM 2009)*, Stockholm, Sweden
- Soffer P, Wand Y, Kaner M (2015) Conceptualizing routing decisions in business processes: theoretical analysis and empirical testing. *J Assoc Inf Syst* 16(5):2
- Stitzlein C, Sanderson P, Indulska M (2013) Understanding healthcare processes. An evaluation of two process model notations. In: *Human factors and ergonomics society annual meeting*, vol 1. Sage, New York, pp 240–244
- Storch A, Laue R, Gruhn V (2013) Measuring and visualising the quality of models. In: *IEEE 1st International workshop on communicating business process and software models quality, understandability, and maintainability (CPSM)*, pp 1–8. doi:10.1109/CPSM.2013.6703084
- Turetken O, Rompen T, Vanderfeesten I, Dikici A, van Moll J (2016) The effect of modularity representation and presentation medium on the understandability of business process models in BPMN. In: *International conference on business process management*. LNCS, Springer, Heidelberg, pp 289–307
- Weber B, Reichert M, Mendling J, Reijers HA (2011) Refactoring large process model repositories. *Comput Ind* 62(5):467
- Weitlaner D, Guettinger A, Kohlbacher M (2013) Intuitive comprehensibility of process models. In: Fischer H, Schneeberger J (eds) *S-BPM ONE—running processes*, vol 360. *Communications in computer and information science*. Springer, Heidelberg, pp 52–71. doi:10.1007/978-3-642-36754-0\_4
- Wiebring J, Sandkuhl K (2015) Selecting the “right” notation for business process modeling: experiences from an industrial case. In: Matulevičius R, Dumas M (eds) *Perspectives in business informatics research, LNBIP*, vol 229. Springer, Heidelberg, pp 129–144. doi:10.1007/978-3-319-21915-8\_9
- Zugal S, Pinggera J, Weber B, Mendling J, Reijers HA (2012) Assessing the impact of hierarchy on model understandability—a cognitive perspective. In: Kienzle J (ed) *Models in software engineering: workshops and symposia at MODELS 2011*, Wellington, New Zealand, Reports and revised selected papers. Springer, Heidelberg, pp 123–133. doi:10.1007/978-3-642-29645-1\_14
